# Supplementary material for: Holocene onshore/offshore tephra correlation of Mt. Etna, Sicily
Source: Springer Nature journal article supplement (doi:10.1007/s00445-024-01785-x), 2024-12-06
Supplement: MOESM1 [file 445_2024_1785_MOESM1_ESM.xlsx]

## Sheet: Supplementary Table A
Supplementary Table A: Single glass shard geochemical composition of the terrestrial marker beds analysed by electron microprobe
Sample	Na2O	K2O	FeOt	SiO2	TiO2	MgO	CaO	MnO	Al2O3	P2O5	Total	# Glass shards identified in EMP	Na2O	K2O	FeOt	SiO2	TiO2	MgO	CaO	MnO	Al2O3	P2O5	Total
	[wt%]	[wt%]	[wt%]	[wt%]	[wt%]	[wt%]	[wt%]	[wt%]	[wt%]	[wt%]	[wt%]		[wt%]	[wt%]	[wt%]	[wt%]	[wt%]	[wt%]	[wt%]	[wt%]	[wt%]	[wt%]	[wt%]
1669	4	2.76	11.19	49.77	2.28	3.99	8.61	0.2745	15.82	0.8779	98.6945	20	4.05291	2.79651	11.338	50.4283	2.31016	4.04278	8.72389	0.278131	16.0293	0.889513	100
	4.19	2.55	11.17	49.97	2.23	3.99	8.69	0.2224	16.14	0.7852	99.1524		4.22582	2.5718	11.2655	50.3972	2.24906	4.02411	8.76429	0.224301	16.278	0.791912	100
	4.05	2.61	11.04	49.78	2.23	4.07	8.46	0.189	15.89	0.8926	98.319		4.11924	2.65462	11.2288	50.6311	2.26813	4.13959	8.60464	0.192231	16.1617	0.907861	100
	3.64	2.68	11.8	49.74	2.31	3.59	8.57	0.1296	16.07	0.7785	98.5296		3.69432	2.71999	11.9761	50.4823	2.34447	3.64358	8.69789	0.131534	16.3098	0.790118	100
	4.05	2.59	11.45	49.77	2.28	3.91	8.67	0.3708	15.9	0.8717	98.9908		4.09129	2.6164	11.5667	50.2774	2.30324	3.94986	8.75839	0.37458	16.0621	0.880587	100
	3.56	2.65	11.25	49.06	2.21	3.97	8.43	0.1822	15.86	0.844	97.1722		3.6636	2.72712	11.5774	50.4877	2.27431	4.08553	8.67532	0.187502	16.3215	0.868561	100
	3.88	2.4	10.77	49.65	2.14	4.13	8.7	0.3064	16.07	0.8614	98.0464		3.95731	2.44782	10.9846	50.6393	2.18264	4.21229	8.87335	0.312505	16.3902	0.878564	100
	3.56	2.67	11.57	49.58	2.18	3.99	8.55	0.2502	15.92	0.8772	98.2702		3.62266	2.717	11.7737	50.4527	2.21837	4.06023	8.7005	0.254604	16.2002	0.892641	100
	3.82	2.67	11.59	50.16	2.28	4.01	8.53	0.2066	15.74	0.8989	99.0066		3.85833	2.69679	11.7063	50.6633	2.30288	4.05024	8.61559	0.208673	15.8979	0.907919	100
	3.72	2.59	11.51	50.17	2.2	3.85	8.46	0.2536	16.07	0.8168	98.8236		3.76428	2.62083	11.647	50.7672	2.22619	3.89583	8.56071	0.256619	16.2613	0.826523	100
	3.5	2.57	11.11	50.28	2.24	4.01	8.7	0.2801	15.88	0.9113	98.5701		3.55077	2.60728	11.2712	51.0094	2.27249	4.06817	8.82621	0.284163	16.1104	0.92452	100
	3.79	2.66	11.44	50.14	2.17	3.93	8.51	0.1936	16.3	0.8472	99.1336		3.82312	2.68325	11.54	50.5782	2.18897	3.96435	8.58438	0.195292	16.4425	0.854604	100
	4.06	2.55	11.19	49.71	2.1	3.93	8.42	0.307	16.19	0.8816	98.457		4.12363	2.58996	11.3654	50.489	2.13291	3.99159	8.55196	0.311811	16.4437	0.895416	100
	3.96	2.57	11.99	49.43	2.24	4.13	8.56	0.2999	15.99	0.7881	99.1699		3.99315	2.59151	12.0904	49.8438	2.25875	4.16457	8.63165	0.30241	16.1238	0.794697	100
	4.04	2.84	11.18	50.26	2.16	3.73	8.33	0.2543	15.88	0.8788	98.6743		4.09428	2.87816	11.3302	50.9352	2.18902	3.78011	8.44191	0.257717	16.0933	0.890607	100
	3.62	2.67	10.86	49.55	2.14	4	8.49	0.1881	16.01	0.7654	97.5281		3.71175	2.73767	11.1353	50.8059	2.19424	4.10138	8.70518	0.192867	16.4158	0.784799	100
	3.54	2.47	11.76	49.57	2.22	3.95	8.71	0.316	15.99	0.8909	98.526		3.59296	2.50695	11.9359	50.3116	2.25321	4.00909	8.84031	0.320728	16.2292	0.904228	100
	4.38	2.74	10.69	50.26	2.26	3.84	8.26	0.2204	15.76	0.8928	98.4104		4.45075	2.78426	10.8627	51.0718	2.29651	3.90203	8.39342	0.22396	16.0146	0.907221	100
	4.29	2.65	10.88	49.9	2.14	3.91	8.43	0.3	16.15	0.839	98.65		4.34871	2.68626	11.0289	50.5829	2.16929	3.96351	8.54536	0.304105	16.371	0.850482	100
	3.82	2.44	11.03	50.08	2.15	3.9	8.34	0.1219	15.06	0.7549	97.6969		3.91005	2.49752	11.29	51.2606	2.20068	3.99194	8.53661	0.124774	15.415	0.772696	100
	3.79	2.4	10.55	50	2.21	3.97	8.37	0.2915	15.43	0.7201	97.7317		3.87796	2.4557	10.7949	51.1605	2.26129	4.06214	8.56426	0.298266	15.7881	0.736813	100
	4.26	2.43	11.51	49.92	2.19	3.85	8.47	0.1459	15.29	0.8697	98.9356		4.30583	2.45614	11.6338	50.4571	2.21356	3.89142	8.56112	0.14747	15.4545	0.879057	100
	3.98	2.48	11.24	49.98	2.2	3.93	8.34	0.2392	15.61	0.8052	98.8044		4.02816	2.51001	11.376	50.5848	2.22662	3.97756	8.44092	0.242094	15.7989	0.814943	100
	3.72	2.46	10.85	50.58	2.15	3.91	8.53	0.2865	15.24	0.8469	98.5735		3.77383	2.4956	11.007	51.312	2.18111	3.96658	8.65344	0.290646	15.4605	0.859156	100
	3.54	2.43	10.9	49.42	2.23	3.97	8.38	0.2482	14.94	0.7571	96.8154		3.65644	2.50993	11.2585	51.0456	2.30335	4.10059	8.65565	0.256364	15.4314	0.782004	100
	3.73	2.29	10.63	50.87	2.14	3.73	8.42	0.1574	16.11	0.8449	98.9224		3.77063	2.31495	10.7458	51.4241	2.16331	3.77063	8.51172	0.159115	16.2855	0.854104	100
	3.65	2.31	10.43	49.46	2.11	4.35	9.4	0.253	15.3	0.7547	98.0178		3.72381	2.35671	10.6409	50.4602	2.15267	4.43797	9.59009	0.258116	15.6094	0.769962	100
	3.82	2.54	10.79	49.9	2.12	3.95	8.26	0.3169	15.86	0.8245	98.3815		3.88284	2.58179	10.9675	50.7209	2.15488	4.01498	8.39589	0.322113	16.1209	0.838064	100
	4.13	2.62	11.47	50.13	2.27	3.86	8.41	0.2745	15.93	0.8069	99.0945		4.16774	2.64394	11.5748	50.5881	2.29074	3.89527	8.48685	0.277008	16.0756	0.814273	100
FV	4.94	2.43	10.58	50.79	2.05	3.78	7.72	0.2016	15.7	0.7527	98.1916	37	5.03098	2.47475	10.7749	51.7254	2.08775	3.84962	7.86218	0.205313	15.9891	0.766563	100
	5.49	2.96	10.49	50.89	2.12	3.49	7.44	0.15	15.64	0.9063	98.67		5.564	2.9999	10.6314	51.576	2.14858	3.53704	7.54029	0.152022	15.8508	0.918516	100
	5.44	2.77	10.77	50.89	2.11	3.57	7.32	0.2233	15.65	0.9357	98.7433		5.50923	2.80525	10.9071	51.5377	2.13685	3.61544	7.41316	0.226142	15.8492	0.947609	100
	5.15	2.89	10.63	51.09	2.02	3.4	7.07	0.1226	15.77	0.8735	98.1426		5.24747	2.94469	10.8312	52.0569	2.05823	3.46435	7.2038	0.12492	16.0685	0.890031	100
	5.1	2.67	11.13	51.27	2.07	3.61	7.61	0.2022	15.49	0.8679	99.1522		5.14361	2.69283	11.2252	51.7084	2.0877	3.64087	7.67507	0.203929	15.6224	0.875321	100
	5.19	2.46	10.43	50.53	2.02	3.92	7.7	0.2601	15.78	0.8421	98.2901		5.28029	2.5028	10.6114	51.409	2.05514	3.98819	7.83395	0.264625	16.0545	0.85675	100
	5.33	2.54	10.12	50.7	1.88	3.73	7.69	0.1697	16.34	0.8173	98.4997		5.41118	2.57869	10.2741	51.4722	1.90864	3.78681	7.80713	0.172285	16.5889	0.829749	100
	5.88	3.35	9.38	51.48	2.03	3.06	6.47	0.2117	15.79	1.0959	97.6517		6.0214	3.43056	9.60557	52.718	2.07882	3.13359	6.62559	0.216791	16.1697	1.12225	100
	4.89	2.59	11.21	51.2	2.02	3.66	7.78	0.2491	15.54	0.8451	99.1391		4.93246	2.61249	11.3073	51.6446	2.03754	3.69178	7.84756	0.251263	15.6749	0.852439	100
	4.97	2.39	10.22	51.18	1.96	3.7	7.75	0.327	16.31	0.7938	98.807		5.03001	2.41886	10.3434	51.7979	1.98367	3.74467	7.84357	0.330948	16.5069	0.803384	100
	5.39	3.24	9.71	52.39	1.95	3	6.37	0.1388	15.81	1.1629	97.9988		5.50007	3.30616	9.90828	53.4598	1.98982	3.06126	6.50008	0.141634	16.1329	1.18665	100
	4.59	2.73	10.68	51.18	2.03	3.58	7.38	0.2518	15.5	0.8345	97.9218		4.68741	2.78794	10.9067	52.2662	2.07308	3.65598	7.53663	0.257144	15.829	0.852211	100
	5.5	2.71	10.45	50.54	2.06	3.48	7.24	0.2766	15.6	0.9139	97.8566		5.62047	2.76936	10.6789	51.647	2.10512	3.55622	7.39858	0.282659	15.9417	0.933918	100
	4.81	2.61	10.88	51.21	2.15	3.62	7.55	0.2577	15.56	0.9424	98.6477		4.87594	2.64578	11.0291	51.912	2.17947	3.66962	7.6535	0.261233	15.7733	0.955319	100
	5.14	2.45	9.71	51.24	1.83	3.8	7.75	0.271	16.72	0.8012	98.911		5.19659	2.47697	9.81691	51.8041	1.85015	3.84184	7.83533	0.273984	16.9041	0.810021	100
	4.43	2.99	9.99	51.69	2.2	3.29	6.66	0.1962	15.63	1.0918	97.0762		4.56343	3.08005	10.2909	53.2468	2.26626	3.38909	6.86059	0.202109	16.1008	1.12468	100
	4.62	2.67	10.13	50.88	2.04	3.54	7.6	0.2837	15.56	0.8315	97.3237		4.74705	2.74342	10.4086	52.2791	2.0961	3.63735	7.80899	0.291501	15.9879	0.854365	100
	5.92	3.51	9.65	52.4	2.01	2.72	6.04	0.2147	15.59	1.2146	98.0547		6.03745	3.57963	9.84145	53.4396	2.04988	2.77396	6.15983	0.218959	15.8993	1.2387	100
	5.1	2.75	9.97	50.22	2.04	3.51	7.46	0.2539	15.5	0.9114	96.8039		5.26838	2.84079	10.2992	51.8781	2.10735	3.62589	7.7063	0.262283	16.0118	0.941491	100
	4.52	2.08	10.08	51.15	1.84	3.92	8.16	0.289	16.46	0.8172	98.499		4.58888	2.1117	10.2336	51.9295	1.86804	3.97974	8.28435	0.293404	16.7108	0.829653	100
	5.68	2.29	10.43	50.58	1.81	3.83	7.81	0.1542	16.53	0.8511	99.9653		5.68197	2.29079	10.4336	50.5976	1.81063	3.83133	7.81271	0.154254	16.5357	0.851395	100
	5	2.16	9.96	51.12	1.89	3.8	7.98	0.2163	16.28	0.7185	99.1248		5.04415	2.17907	10.0479	51.5714	1.90669	3.83355	8.05046	0.21821	16.4237	0.724844	100
	4.77	2.12	9.88	51.52	1.91	3.65	7.98	0.2187	16.95	0.7488	99.7475		4.78207	2.12537	9.90501	51.6504	1.91483	3.65924	8.0002	0.219254	16.9929	0.750696	100
	4.98	2	9.78	50.92	1.88	3.7	8.16	0.1516	16.42	0.7126	98.7042		5.04538	2.02626	9.90839	51.5885	1.90468	3.74857	8.26713	0.15359	16.6356	0.721955	100
	5.29	2.2	10.53	50.58	1.91	4.03	8.18	0.2371	15.85	0.7003	99.5074		5.31619	2.21089	10.5821	50.8304	1.91946	4.04995	8.22049	0.238274	15.9285	0.703767	100
	5.16	2.49	9.51	51.64	1.82	3.54	7.5	0.1166	16.44	0.7569	98.9735		5.21352	2.51582	9.60863	52.1756	1.83888	3.57671	7.57779	0.117809	16.6105	0.76475	100
	4.95	2.48	9.61	51.02	1.8	3.84	7.8	0.2389	16.43	0.7689	98.9378		5.00314	2.50663	9.71317	51.5678	1.81932	3.88123	7.88374	0.241465	16.6064	0.777155	100
	5.24	2.27	10.55	50.48	1.78	3.87	7.91	0.2595	16.42	0.7167	99.4962		5.26653	2.28149	10.6034	50.7356	1.78901	3.8896	7.95005	0.260814	16.5031	0.720329	100
	5.06	2.26	9.56	51	1.84	3.89	7.91	0.2027	16.22	0.6682	98.6109		5.13128	2.29184	9.69467	51.7184	1.86592	3.9448	8.02143	0.205555	16.4485	0.677613	100
	5.01	2.11	9.88	50.68	1.91	3.82	7.97	0.1166	16.62	0.7764	98.893		5.06608	2.13362	9.9906	51.2473	1.93138	3.86276	8.05922	0.117905	16.806	0.785091	100
	4.93	2.12	9.84	50.64	1.77	3.68	8.1	0.2252	16.6	0.6869	98.5921		5.0004	2.15027	9.98052	51.3631	1.79528	3.73255	8.21567	0.228416	16.837	0.696709	100
	4.97	2.07	9.93	50.3	1.83	3.88	8.03	0.2156	16.49	0.8175	98.5331		5.04399	2.10082	10.0778	51.0488	1.85724	3.93776	8.14955	0.21881	16.7355	0.82967	100
	5.13	2.44	10.4	50.65	1.85	3.9	7.77	0.2246	16.31	0.8365	99.5111		5.1552	2.45199	10.4511	50.8988	1.85909	3.91916	7.80817	0.225703	16.3901	0.84061	100
	5.32	2.49	9.74	50.73	1.82	3.7	7.56	0.3359	16.37	0.7673	98.8332		5.38281	2.5194	9.85499	51.3289	1.84149	3.74368	7.64925	0.339866	16.5633	0.776359	100
	5.03	2.36	10.2	50.31	1.82	3.82	7.78	0.17	16.12	0.6546	98.2646		5.11883	2.40168	10.3801	51.1985	1.85214	3.88746	7.9174	0.173002	16.4047	0.666161	100
	5.39	2.27	10.02	50.41	1.81	3.82	7.99	0.2628	16.26	0.7939	99.0267		5.44298	2.29231	10.1185	50.9055	1.82779	3.85755	8.06853	0.265383	16.4198	0.801703	100
	4.7	2.12	10.29	50.59	1.82	3.72	8.08	0.2358	16.55	0.7407	98.8465		4.75485	2.14474	10.4101	51.1804	1.84124	3.76341	8.17429	0.238552	16.7431	0.749344	100
FF	5.63	3.16	9.76	51.65	2.11	3.34	6.95	0.2125	15.59	0.8871	98.4025	44	5.7214	3.2113	9.91845	52.4885	2.14425	3.39422	7.06283	0.21595	15.8431	0.901501	100
	5.67	2.75	10.55	51.03	2.04	3.63	7.41	0.2062	15.77	0.946	99.0562		5.72402	2.7762	10.6505	51.5162	2.05944	3.66459	7.4806	0.208165	15.9203	0.955013	100
	5.18	3.64	10.46	51.64	2.08	3.37	6.91	0.2198	16	0.9231	99.4998		5.20604	3.6583	10.5126	51.8996	2.09046	3.38694	6.94474	0.220905	16.0804	0.927741	100
	6.08	3.17	9.86	51.52	2.12	3.36	6.79	0.2283	15.85	1.1133	98.9783		6.14276	3.20272	9.96178	52.0518	2.14188	3.39468	6.86009	0.230657	16.0136	1.12479	100
	5.27	3.16	10.71	51.6	2.2	3.32	6.92	0.2834	15.61	1.0333	99.0734		5.31929	3.18955	10.8102	52.0826	2.22058	3.35105	6.98472	0.286051	15.756	1.04296	100
	4.86	2.95	10.78	51.74	2.16	3.55	7.39	0.2223	15.46	0.9123	99.1123		4.90353	2.97642	10.8766	52.2034	2.17935	3.5818	7.45619	0.224291	15.5985	0.920471	100
	5.85	3.28	10.46	51.42	2.15	3.44	6.68	0.139	15.86	0.9883	99.279		5.89248	3.30382	10.536	51.7934	2.16561	3.46498	6.72851	0.140009	15.9752	0.995477	100
	5.4	3.24	10.12	51.16	2.23	3.75	7.06	0.3203	15.32	1.0404	98.6003		5.47666	3.28599	10.2637	51.8863	2.26166	3.80323	7.16022	0.324847	15.5375	1.05517	100
	6.07	2.81	10.12	51.27	2.1	3.45	7.26	0.2334	15.31	0.9801	98.6234		6.15473	2.84922	10.2613	51.9856	2.12931	3.49816	7.36134	0.236658	15.5237	0.99378	100
	5.5	3.18	11.18	51.51	2.11	3.46	6.87	0.2581	15.13	1.2082	99.1981		5.54446	3.20571	11.2704	51.9264	2.12706	3.48797	6.92554	0.260186	15.2523	1.21797	100
	5.59	2.72	10.73	50.98	2.09	3.66	7.39	0.2129	15.74	0.9164	99.1129		5.64003	2.74435	10.826	51.4363	2.10871	3.69276	7.45614	0.214806	15.8809	0.924602	100
	4.97	2.89	10.44	51.88	2.09	3.51	7.33	0.2252	15.69	1.0943	99.0252		5.01892	2.91845	10.5428	52.3907	2.11057	3.54455	7.40216	0.227417	15.8445	1.10507	100
	5.2	2.9	10.77	50.83	2.15	3.55	7.08	0.2745	15.28	0.9779	98.0345		5.30426	2.95814	10.9859	51.8491	2.19311	3.62117	7.22195	0.280003	15.5863	0.997506	100
	5.62	2.83	10.16	51.21	2.13	3.42	7.27	0.1437	15.6	0.9798	98.3837		5.71233	2.87649	10.3269	52.0513	2.16499	3.47619	7.38944	0.146061	15.8563	0.995897	100
	5.49	4.3	10.61	51.68	2.14	3.27	6.1	0.1661	15.76	0.9672	99.5161		5.5167	4.32091	10.6616	51.9313	2.15041	3.2859	6.12966	0.166908	15.8366	0.971903	100
	4.95	2.93	10.74	51.58	2.13	3.3	7.14	0.2175	15.46	0.9654	98.4475		5.02806	2.97621	10.9094	52.3934	2.16359	3.35204	7.2526	0.22093	15.7038	0.980624	100
	5.62	2.83	10.58	50.97	2.13	3.51	7.18	0.1697	15.66	0.9578	98.6497		5.69693	2.86874	10.7248	51.6677	2.15916	3.55804	7.27828	0.172023	15.8744	0.97091	100
	5.09	2.88	10.27	51.31	2.17	3.57	7.42	0.2713	15.61	0.9545	98.5913		5.16273	2.92115	10.4167	52.0431	2.20101	3.62101	7.52602	0.275176	15.833	0.968138	100
	4.7	2.87	10.79	51.69	2.21	3.36	7.14	0.3652	15.36	1.0014	98.4852		4.77229	2.91414	10.956	52.485	2.24399	3.41168	7.24982	0.370817	15.5963	1.0168	100
	5.1	2.75	10.61	51.23	2.06	3.56	7.34	0.1907	15.59	1.0084	98.4307		5.18131	2.79384	10.7792	52.0468	2.09284	3.61676	7.45702	0.19374	15.8386	1.02448	100
	4.94	3.49	10	51.37	2.1	3.11	6.96	0.1483	15.46	0.9559	98.5343		5.01348	3.54191	10.1488	52.1341	2.13124	3.15626	7.06353	0.150506	15.69	0.970119	100
	5.19	2.85	10.04	51.07	2.01	3.4	7.09	0.2236	15.22	0.9071	98.0008		5.29588	2.90814	10.2448	52.1118	2.051	3.46936	7.23463	0.228161	15.5305	0.925605	100
	2.9	3.85	10.05	51.72	2.02	3.42	7.23	0.2104	15.16	1.0457	97.6062		2.97112	3.94442	10.2965	52.9884	2.06954	3.50388	7.40732	0.21556	15.5318	1.07135	100
	3.01	3.8	10.74	51.66	1.99	3.74	6.73	0.2911	15.38	1.0113	98.3524		3.06042	3.86366	10.9199	52.5254	2.02334	3.80265	6.84274	0.295977	15.6376	1.02824	100
	5.17	2.34	9.77	50.88	1.84	3.9	7.86	0.1523	16.09	0.74	98.7424		5.23585	2.3698	9.89443	51.528	1.86343	3.94967	7.96011	0.15424	16.2949	0.749425	100
	4.91	2.93	10.7	51.67	2.02	3.31	6.79	0.333	15.22	0.8996	98.7826		4.97051	2.96611	10.8319	52.3068	2.04489	3.35079	6.87368	0.337104	15.4076	0.910687	100
	4.78	2.77	10.06	50.33	2.05	3.32	6.81	0.1056	14.69	0.9497	95.8654		4.98616	2.88947	10.4939	52.5007	2.13841	3.46319	7.10371	0.110154	15.3236	0.99066	100
	5.2	2.79	9.71	50.74	1.99	3.55	7.19	0.2724	14.86	0.9756	97.2781		5.3455	2.86807	9.98169	52.1597	2.04568	3.64933	7.39118	0.280022	15.2758	1.0029	100
	5.1	2.41	9.67	50.49	1.86	3.92	7.54	0.0902	15.5	0.8362	97.4165		5.23525	2.47391	9.92645	51.829	1.90933	4.02396	7.73996	0.0925921	15.9111	0.858376	100
	4.99	2.42	9.43	51.09	1.83	3.96	7.56	0.238	15.93	0.7882	98.2363		5.07959	2.46345	9.5993	52.0073	1.86286	4.0311	7.69573	0.242273	16.216	0.802351	100
	4.72	2.7	10.11	51.35	1.99	3.41	7.15	0.2924	15.25	0.953	97.9255		4.81999	2.7572	10.3242	52.4378	2.03216	3.48224	7.30147	0.298594	15.5731	0.973189	100
	4.77	2.75	10.13	50.94	2	3.42	7.05	0.3281	15.4	0.9083	97.6965		4.88247	2.81484	10.3688	52.1411	2.04716	3.50064	7.21623	0.335836	15.7631	0.929716	100
	4.85	2.71	9.49	51.15	1.92	3.14	7.34	0.18	16.09	0.8451	97.7151		4.96341	2.77337	9.71191	52.3461	1.9649	3.21342	7.51163	0.184209	16.4662	0.864861	100
	5.33	2.81	10.06	50.48	2.01	3.55	7.21	0.1971	15.09	0.9849	97.7221		5.45424	2.8755	10.2945	51.6567	2.05685	3.63275	7.37806	0.201694	15.4417	1.00786	100
	5.12	3.02	9.91	51.32	2.05	3.35	6.88	0.2065	15.11	1.0107	97.9772		5.22571	3.08235	10.1146	52.3795	2.09232	3.41916	7.02204	0.210763	15.422	1.03157	100
	5.18	2.72	9.56	51.14	2.05	3.48	7.02	0.1838	15.08	0.9398	97.3537		5.3208	2.79394	9.81986	52.5301	2.10572	3.57459	7.21082	0.188796	15.4899	0.965346	100
	4.75	2.73	9.89	51.25	2.05	3.47	7.05	0.259	15.4	0.9502	97.7993		4.85689	2.79143	10.1125	52.4032	2.09613	3.54808	7.20864	0.264828	15.7465	0.971582	100
	4.83	3.02	10.26	51.8	2	3.36	7.01	0.1889	15.22	0.985	98.674		4.89491	3.06058	10.3979	52.4961	2.02688	3.40515	7.1042	0.191438	15.4245	0.998237	100
	5.7	2.98	10.41	51.06	2.01	3.26	6.76	0.1561	15.31	0.9566	98.6028		5.78077	3.02223	10.5575	51.7835	2.03848	3.30619	6.85579	0.158312	15.5269	0.970155	100
	5.09	2.77	9.45	50.85	1.94	3.39	6.94	0.1545	15.29	0.9534	96.828		5.25674	2.86074	9.75957	52.5158	2.00355	3.50105	7.16735	0.159561	15.7909	0.984633	100
	5.42	2.7	9.84	50.5	1.97	3.57	7.13	0.1244	15.27	0.8974	97.4219		5.56343	2.77145	10.1004	51.8364	2.02213	3.66447	7.31868	0.127692	15.6741	0.921148	100
	5.85	3.31	10	50.72	2.06	3.32	6.72	0.2314	14.98	1.0196	98.2111		5.95656	3.37029	10.1821	51.6439	2.09752	3.38047	6.8424	0.235615	15.2529	1.03817	100
	5.42	2.93	10.05	51.44	2	3.41	5.79	0.3329	15.34	0.9193	97.6323		5.55144	3.00106	10.2937	52.6875	2.0485	3.4927	5.93041	0.340973	15.712	0.941594	100
	4.94	2.76	9.75	50.96	2	3.52	7.26	0.3136	15	0.8048	97.3085		5.07664	2.83634	10.0197	52.3695	2.05532	3.61736	7.46081	0.322274	15.4149	0.82706	100
FG	4.6	2.74	9.16	50.6	1.84	3.62	7.15	0.2225	17.16	0.8761	97.0925	55	4.73775	2.82205	9.4343	52.1153	1.8951	3.7284	7.36411	0.229163	17.6739	0.902335	100
	4.92	2.67	9.4	51.37	1.76	3.56	7.59	0.1745	17.07	0.7416	98.5145		4.99419	2.71026	9.54174	52.1446	1.78654	3.61368	7.70445	0.177131	17.3274	0.752783	100
	5.37	2.93	9.48	50.65	1.77	3.23	7.07	0.1638	17.01	0.9169	97.6738		5.49789	2.99978	9.70578	51.8563	1.81215	3.30693	7.23838	0.167701	17.4151	0.938737	100
	5.43	2.99	9.54	51.95	1.93	3.24	6.54	0.1924	16.52	0.9961	98.3324		5.52209	3.04071	9.70179	52.831	1.96273	3.29495	6.65091	0.195663	16.8002	1.01299	100
	5.04	2.61	9.17	51.25	1.9	3.61	7.29	0.2318	16.91	0.8268	98.0118		5.14224	2.66294	9.35602	52.2896	1.93854	3.68323	7.43788	0.236502	17.253	0.843572	100
	5.46	2.52	9.05	50.2	1.86	3.76	7.36	0.1607	16.69	0.8219	97.0607		5.62535	2.59631	9.32406	51.7202	1.91633	3.87386	7.58288	0.165566	17.1954	0.84679	100
	5.39	2.35	8.71	51.42	1.7	3.44	7.77	0.2364	17.38	0.8159	98.3964		5.47784	2.3883	8.85195	52.258	1.72771	3.49606	7.89663	0.240253	17.6632	0.829197	100
	5.5	2.5	9.23	50.07	1.87	3.69	7.41	0.2588	16.9	0.8923	97.4288		5.64515	2.56598	9.47358	51.3914	1.91935	3.78738	7.60555	0.26563	17.346	0.915848	100
	5.59	2.42	8.7	48.47	1.78	3.57	7.41	0.2137	16.84	0.8911	94.9937		5.8846	2.54754	9.1585	51.0244	1.87381	3.75814	7.80052	0.224962	17.7275	0.938062	100
	4.91	2.42	9.16	51.05	1.78	3.55	7.73	0.2745	17	0.8887	97.8745		5.01663	2.47255	9.35892	52.1586	1.81866	3.62709	7.89787	0.280461	17.3692	0.908	100
	4.9	2.43	9.24	52.21	1.82	3.68	7.63	0.2293	17.12	0.9493	99.2593		4.93657	2.44813	9.30895	52.5996	1.83358	3.70746	7.68694	0.231011	17.2478	0.956384	100
	5.58	2.53	9.39	52.12	1.79	3.56	7.51	0.1372	17.11	0.7751	99.7272		5.59526	2.53692	9.41569	52.2626	1.7949	3.56974	7.53054	0.137575	17.1568	0.77722	100
	5.12	2.53	8.27	51.55	1.71	3.38	7.32	0.2119	16.64	0.8589	96.7319		5.29298	2.61548	8.5494	53.2916	1.76777	3.49419	7.56731	0.219059	17.2022	0.887918	100
	5.07	2.43	9.33	51.74	1.8	3.65	7.68	0.2023	17	0.8044	98.9023		5.12627	2.45697	9.43355	52.3143	1.81998	3.69051	7.76524	0.204545	17.1887	0.813328	100
	5.7	2.31	9.37	50.73	1.78	3.68	7.41	0.2613	16.88	0.8018	98.1213		5.80914	2.35423	9.5494	51.7013	1.81408	3.75046	7.55188	0.266303	17.2032	0.817152	100
	5.76	2.76	8.81	51.95	1.81	3.14	6.64	0.2821	16.71	0.9272	97.8621		5.88583	2.8203	9.00246	53.0849	1.84954	3.2086	6.78506	0.288263	17.075	0.947456	100
	5.15	2.57	9.39	51.71	1.79	3.42	7.36	0.2169	16.93	0.8135	98.5369		5.22647	2.60816	9.52943	52.4778	1.81658	3.47078	7.46928	0.220121	17.1814	0.825579	100
	5.01	2.49	9.34	51.43	1.79	3.64	7.66	0.2297	16.76	0.8463	98.3497		5.09407	2.53178	9.49672	52.293	1.82004	3.70108	7.78853	0.233554	17.0412	0.860501	100
	6.18	3.09	8.29	53.76	1.73	2.76	5.81	0.2333	17.44	0.8492	99.2933		6.22398	3.11199	8.349	54.1426	1.74231	2.77964	5.85135	0.23496	17.5641	0.855244	100
	4.99	2.57	9.66	51.84	1.8	3.63	7.68	0.1757	17.07	0.9068	99.4157		5.01933	2.5851	9.71678	52.1447	1.81058	3.65133	7.72514	0.176733	17.1703	0.91213	100
	6.06	2.96	7.62	53.46	1.69	2.89	5.88	0.2093	17.4	0.8643	98.1693		6.17301	3.0152	7.7621	54.4569	1.72152	2.94389	5.98965	0.213203	17.7245	0.880418	100
	5.53	2.45	9.52	51.39	1.83	3.59	7.59	0.2391	17.03	0.8284	99.1691		5.57633	2.47053	9.59976	51.8206	1.84533	3.62008	7.65359	0.241103	17.1727	0.835341	100
	5.3	2.46	8.95	51.52	1.78	3.56	7.42	0.2407	16.98	0.85	98.2107		5.39656	2.50482	9.11306	52.4586	1.81243	3.62486	7.55518	0.245085	17.2894	0.865486	100
	6.19	3.13	7.26	53.95	1.69	2.47	5.3	0.2181	17.67	0.6123	97.8781		6.32419	3.19786	7.41739	55.1196	1.72664	2.52355	5.4149	0.222828	18.0531	0.625574	100
	5.14	2.36	9.45	51.11	1.81	3.61	7.7	0.1958	16.93	0.8581	98.3058		5.22858	2.40067	9.61286	51.9908	1.84119	3.67221	7.8327	0.199174	17.2218	0.872888	100
	5.17	2.37	9.83	51.41	1.87	3.77	7.71	0.2011	16.8	0.8915	100.023		5.16883	2.36946	9.82778	51.3984	1.86958	3.76915	7.70826	0.201055	16.7962	0.891299	100
	4.52	2.6	9.75	52.57	1.89	3.46	7.05	0.1734	17.01	0.8755	99.8989		4.52457	2.60263	9.75987	52.6232	1.89191	3.4635	7.05713	0.173575	17.0272	0.876386	100
	5.34	2.42	9.24	50.89	1.79	3.33	7.55	0.1586	17.2	0.7647	98.6833		5.41125	2.45229	9.36329	51.569	1.81388	3.37443	7.65074	0.160716	17.4295	0.774903	100
	4.71	2.42	9.48	52.84	1.82	3.28	7.46	0.1702	17.49	0.991	100.661		4.67906	2.4041	9.41773	52.4929	1.80805	3.25846	7.411	0.169082	17.3751	0.984491	100
	4.35	2.35	10.62	51.69	1.84	3.58	7.38	0.1932	17.35	0.8793	100.232		4.33991	2.34455	10.5954	51.5701	1.83573	3.5717	7.36288	0.192752	17.3098	0.87726	100
	4.91	2.47	9.49	52.1	1.79	3.43	7.31	0.2355	17.45	0.8644	100.05		4.90755	2.46877	9.48527	52.074	1.78911	3.42829	7.30635	0.235383	17.4413	0.863969	100
	4.72	1.68	8.43	53.51	1.6656	3.56	7.8	0.1641	18.17	0.8999	100.6		4.69187	1.66999	8.37975	53.1911	1.65567	3.53878	7.75351	0.163122	18.0617	0.894536	100
	5.07	2.3	9.16	51.65	1.81	3.47	7.53	0.2191	17.1	0.8962	99.2053		5.11061	2.31842	9.23338	52.0638	1.8245	3.4978	7.59032	0.220855	17.237	0.903379	100
	4.77	2.7	8.94	53	1.84	3.16	6.51	0.233	17.21	0.8418	99.2048		4.80824	2.72164	9.01166	53.4248	1.85475	3.18533	6.56218	0.234868	17.348	0.848548	100
	5.07	2.53	10.47	51.54	1.92	3.5	7.09	0.1432	16.83	0.9557	100.049		5.06752	2.52876	10.4649	51.5148	1.91906	3.49829	7.08653	0.14313	16.8218	0.955233	100
	5.6	2.58	8.72	52.22	1.77	3.19	7.15	0.1866	17.42	0.9022	99.7388		5.61467	2.58676	8.74284	52.3568	1.77464	3.19835	7.16872	0.187089	17.4656	0.904563	100
	4.62	2.51	10.09	52.68	1.87	3.33	6.81	0.1999	17.32	0.8293	100.259		4.60806	2.50351	10.0639	52.5438	1.86517	3.32139	6.79239	0.199383	17.2752	0.827156	100
	5.26	2.02	8.92	51.78	1.81	2.95	7.73	0.1212	18.58	0.7604	99.9316		5.2636	2.02138	8.92611	51.8154	1.81124	2.95202	7.73529	0.121283	18.5927	0.76092	100
	5.33	2.42	9.12	51.66	1.8	3.48	7.34	0.2717	17.19	0.842	99.4537		5.35928	2.43329	9.1701	51.9438	1.80989	3.49912	7.38032	0.273192	17.2844	0.846625	100
	4.68	1.88	9.25	52.44	1.6598	2.97	8	0.1639	18.61	0.7254	100.379		4.66233	1.8729	9.21507	52.242	1.65353	2.95878	7.96979	0.163281	18.5397	0.72266	100
	5.33	2.08	8.96	52.46	1.8	3.5	7.52	0.2382	17.5	0.9446	100.333		5.31232	2.0731	8.93028	52.286	1.79403	3.48839	7.49506	0.23741	17.442	0.941467	100
	5.19	2.5	9.73	51.41	1.78	3.45	7.3	0.2109	17.14	0.8907	99.6016		5.21076	2.51	9.76892	51.6156	1.78712	3.4638	7.3292	0.211744	17.2086	0.894263	100
	5.27	2.42	9.1	51.86	1.73	3.33	7.23	0.2378	17.1	0.9555	99.2333		5.31072	2.4387	9.17031	52.2607	1.74337	3.35573	7.28586	0.239637	17.2321	0.962882	100
	4.74	2.36	9.35	52.17	1.74	3.44	7.64	0.1566	17.66	0.8227	100.079		4.73624	2.35813	9.34259	52.1287	1.73862	3.43727	7.63395	0.156476	17.646	0.822048	100
	5.06	3	7.79	51.25	1.5921	3.32	6.76	0.2211	16.88	0.8724	96.7457		5.23021	3.10091	8.05204	52.9739	1.64565	3.43168	6.98739	0.228537	17.4478	0.901746	100
	5.24	2.34	8.68	50.3	1.72	3.46	7.45	0.2792	16.71	0.805	96.9842		5.40294	2.41276	8.94991	51.8641	1.77348	3.56759	7.68166	0.287882	17.2296	0.830032	100
	4.95	2.63	8.07	50.07	1.69	3.29	6.68	0.3002	16.27	0.8443	94.7946		5.22182	2.77442	8.51314	52.8195	1.7828	3.47066	7.04681	0.316685	17.1634	0.890663	100
	4.82	2.08	8.13	50.53	1.6384	3.24	7.48	0.0436	16.89	0.8244	95.6765		5.03781	2.17399	8.49738	52.8134	1.71244	3.38641	7.81801	0.0455702	17.6532	0.861654	100
	5	2.34	8.52	48.99	1.7	3.44	7.19	0.2025	16.49	0.8854	94.758		5.2766	2.46945	8.99133	51.7001	1.79404	3.6303	7.58775	0.213702	17.4022	0.93438	100
	4.98	2.64	8.39	50.88	1.7	3.37	7.27	0.2127	17.01	0.8431	97.2959		5.11841	2.71337	8.62318	52.2941	1.74725	3.46366	7.47205	0.218611	17.4828	0.866532	100
	5.1	2.49	8.95	50.16	1.73	3.49	7.3	0.0702	16.35	0.9313	96.5715		5.28106	2.5784	9.26774	51.9408	1.79142	3.6139	7.55917	0.0726923	16.9305	0.964363	100
	4.76	2.63	9.07	50.81	1.71	3.57	7.3	0.2181	16.34	0.8332	97.2414		4.89503	2.70461	9.3273	52.2514	1.75851	3.67128	7.50709	0.224287	16.8035	0.856837	100
	5	2.52	9.23	49.83	1.8	3.61	7.37	0.2116	16.51	0.9109	96.9926		5.15503	2.59814	9.51619	51.3751	1.85581	3.72193	7.59852	0.218161	17.0219	0.939144	100
	5.55	2.36	8.49	49.63	1.69	3.43	7.25	0.3106	16.44	0.8642	96.0149		5.78035	2.45795	8.84238	51.6899	1.76014	3.57236	7.55091	0.323491	17.1223	0.900069	100
	4.39	2.92	8.77	52.17	1.79	3.54	6.84	0.1131	16.84	0.8702	98.2433		4.4685	2.97221	8.92682	53.1029	1.82201	3.6033	6.96231	0.115122	17.1411	0.88576	100
	4.01	1.97	7.62	45.84	1.5423	2.92	6.51	0.1917	14.83	0.6987	86.1328		4.6556	2.28717	8.8468	53.2201	1.79061	3.39011	7.5581	0.222563	17.2176	0.811189	100
	4.83	2.66	8.66	52.08	1.85	3.64	7.18	0.2157	16.87	0.8442	98.83		4.88718	2.69149	8.76252	52.6965	1.8719	3.68309	7.265	0.218254	17.0697	0.854194	100
	4.51	2.6	8.93	51.41	1.81	3.69	7.18	0.214	16.28	0.8277	97.4517		4.62793	2.66799	9.16351	52.7543	1.85733	3.78649	7.36775	0.219596	16.7057	0.849344	100
	4.56	2.77	8.17	52.67	1.71	3.36	6.84	0.1862	16.99	0.8305	98.0868		4.64894	2.82403	8.32936	53.6973	1.74335	3.42554	6.97342	0.189832	17.3214	0.846699	100
	4.61	2.64	9.51	50.99	1.95	3.61	7.02	0.2058	16.74	0.8183	98.0941		4.69957	2.69129	9.69477	51.9807	1.98789	3.68014	7.15639	0.209799	17.0652	0.834199	100
	4.71	1.97	8.1	52.6	1.5951	3.18	7.95	0.237	17.82	0.8488	99.0109		4.75705	1.98968	8.18092	53.1255	1.61103	3.21177	8.02942	0.239368	17.998	0.857279	100
	4.96	2.91	8.98	51.77	1.77	3.55	7.23	0.188	16.61	0.8339	98.802		5.02014	2.94528	9.08888	52.3977	1.79146	3.59304	7.31767	0.19028	16.8114	0.844011	100
	5.72	2.77	8.79	51.88	1.79	3.49	7.04	0.2693	16.48	0.8907	99.1201		5.77078	2.79459	8.86803	52.3405	1.80589	3.52098	7.10249	0.271691	16.6263	0.898607	100
	5.18	2.19	8.58	53.33	1.74	3.31	7.65	0.1253	17.31	0.7762	100.191		5.1701	2.18582	8.56361	53.2281	1.73668	3.30368	7.63539	0.125061	17.2769	0.774717	100
	5.1	2.65	8.81	51.53	1.84	3.5	7.17	0.1488	16.69	0.8063	98.2451		5.1911	2.69734	8.96737	52.4505	1.87287	3.56252	7.29807	0.151458	16.9881	0.820703	100
	5.21	2.88	8.47	52.23	1.81	3.36	7.02	0.2353	17.06	0.8292	99.1045		5.25708	2.90602	8.54653	52.7019	1.82636	3.39036	7.08343	0.237426	17.2142	0.836693	100
	4.95	1.94	9.13	52.56	1.87	3.39	7.63	0.1196	16.82	0.8128	99.2225		4.98879	1.9552	9.20154	52.9719	1.88465	3.41656	7.68979	0.120537	16.9518	0.819169	100
	5.44	2.63	8.43	52.01	1.79	3.66	7.61	0.2598	16.66	0.9647	99.4546		5.46983	2.64442	8.47623	52.2952	1.79982	3.68007	7.65173	0.261225	16.7514	0.96999	100
	5.08	2.78	8.61	51.06	1.76	3.37	6.86	0.2731	16.29	0.7973	96.8805		5.24357	2.86951	8.88724	52.7041	1.81667	3.47851	7.08089	0.281894	16.8145	0.822973	100
	4.56	2.37	8.32	50.58	1.67	3.49	7.1	0.2102	16.7	0.8011	95.8014		4.75985	2.47387	8.68463	52.7967	1.74319	3.64295	7.41117	0.219412	17.4319	0.836209	100
FLmain	5.77	2.32	7.45	53.71	1.6546	2.4	7.47	0.0993	18.04	0.7402	99.6541	0.016	5.79003	2.32805	7.47586	53.8964	1.66034	2.40833	7.49593	0.0996447	18.1026	0.742769	100
	6.46	3.15	6.21	54.94	1.3844	1.87	6.4	0.2327	17.31	0.9638	98.9209		6.53047	3.18436	6.27774	55.5393	1.3995	1.8904	6.46982	0.235238	17.4988	0.974314	100
	5.35	2.41	8.28	52.34	1.75	2.86	7.79	0.1714	17.22	0.9859	99.1573		5.39547	2.43048	8.35037	52.7848	1.76487	2.88431	7.8562	0.172857	17.3663	0.994279	100
	5.41	2.76	9.49	53.49	1.86	2.91	6.53	0.2248	16.32	1.0201	100.015		5.40919	2.75959	9.48859	53.482	1.85972	2.90957	6.52903	0.224767	16.3176	1.01995	100
	6.03	2.86	9.81	52.74	1.86	2.88	6.31	0.1366	16.7	0.8673	100.194		6.01833	2.85447	9.79102	52.6379	1.8564	2.87443	6.29779	0.136336	16.6677	0.865622	100
	5.41	1.78	7.74	52.82	1.3117	3.08	7.76	0.2154	18.5	0.816	99.4331		5.44084	1.79015	7.78413	53.1211	1.31918	3.09756	7.80424	0.216628	18.6055	0.820652	100
	5.42	2.57	7.91	53.71	1.4822	2.8	6.65	0.1488	17.48	0.8544	99.0254		5.47334	2.59529	7.98785	54.2386	1.49679	2.82756	6.71545	0.150264	17.652	0.862809	100
	5.46	3.2	8.23	53.49	1.83	2.77	6.85	0.2601	16.22	1.0378	99.3479		5.49584	3.221	8.28402	53.8411	1.84201	2.78818	6.89496	0.261807	16.3265	1.04461	100
	5.53	2.92	8.41	53.19	1.78	2.8	6.8	0.2179	16.33	0.9018	98.8797		5.59265	2.95308	8.50528	53.7926	1.80017	2.83172	6.87704	0.220369	16.515	0.912017	100
	5.56	2.56	5.97	54.37	1.2477	3.29	8.58	0.1295	16.55	0.9138	99.171		5.60648	2.5814	6.01991	54.8245	1.25813	3.3175	8.65172	0.130583	16.6883	0.921439	100
	5.55	3.19	8.41	52.62	1.82	3.2	6.41	0.2082	16.43	0.9493	98.7875		5.61812	3.22915	8.51322	53.2658	1.84234	3.23928	6.48868	0.210755	16.6317	0.960952	100
	6.12	2.63	6.62	54.07	1.4361	1.99	6.74	0.1913	18.32	0.8531	98.9706		6.18365	2.65735	6.68886	54.6324	1.45104	2.0107	6.8101	0.19329	18.5105	0.861973	100
	6.12	2.31	6.46	53.88	1.5676	1.82	6.94	0.1267	19.05	0.7071	98.9815		6.18297	2.33377	6.52647	54.4344	1.58373	1.83873	7.01141	0.128004	19.246	0.714376	100
	5.79	3.59	6.56	55.44	1.5371	2.02	5.62	0.2262	16.75	0.9695	98.5028		5.87801	3.64457	6.65971	56.2827	1.56046	2.0507	5.70542	0.229638	17.0046	0.984236	100
	5.38	2.63	7.12	53.37	1.58	2.24	6.89	0.1158	18.82	0.7524	98.8983		5.43993	2.6593	7.19931	53.9645	1.5976	2.26495	6.96675	0.11709	19.0296	0.760782	100
	5.61	2.51	8.22	52.33	1.67	3.43	7.49	0.1842	17.26	0.7234	99.4276		5.6423	2.52445	8.26732	52.6313	1.67961	3.44975	7.53312	0.18526	17.3594	0.727565	100
FL	5.03	3.11	9.43	50.96	2.03	3.32	6.9	0.1396	16.53	1.0924	97.4496	12	5.16164	3.19139	9.6768	52.2937	2.08313	3.40689	7.08058	0.143254	16.9626	1.12099	100
marginal	6.42	3.5	8.06	54.58	1.91	2.28	5.13	0.2383	16.29	0.6879	98.4083		6.52384	3.55661	8.19037	55.4628	1.94089	2.31688	5.21297	0.242154	16.5535	0.699026	100
	4.2	2.91	9.69	54.21	2.05	3.33	4.66	0.1114	16.63	0.9759	97.7914		4.29486	2.97572	9.90885	55.4343	2.0963	3.40521	4.76525	0.113916	17.0056	0.997941	100
	6.03	4.42	8.92	54.07	2.07	2.43	4.85	0.2467	15.62	1.0166	98.6567		6.1121	4.48018	9.04145	54.8062	2.09818	2.46309	4.91604	0.250059	15.8327	1.03044	100
	5.42	3.42	9.45	52.48	2.08	3.12	6.41	0.2655	15.91	1.0827	98.5555		5.49944	3.47013	9.58851	53.2492	2.11049	3.16573	6.50395	0.269391	16.1432	1.09857	100
	5.69	3.86	8.69	53.47	1.99	2.84	5.58	0.1314	16.34	0.8309	98.5914		5.77129	3.91515	8.81416	54.2339	2.01843	2.88058	5.65972	0.133277	16.5735	0.842771	100
	5.72	4.31	8.97	54.1	2.01	2.53	5.43	0.2667	15.69	0.8152	99.0267		5.77622	4.35236	9.05816	54.6317	2.02976	2.55487	5.48337	0.269321	15.8442	0.823212	100
	6.01	4.27	8.53	54.2	1.96	2.49	4.96	0.2097	16.05	0.8313	98.6797		6.09041	4.32713	8.64413	54.9252	1.98622	2.52332	5.02636	0.212506	16.2647	0.842423	100
	5.95	3.12	9.12	51.95	1.95	3.24	6.7	0.2422	15.95	0.9154	98.2222		6.05769	3.17647	9.28507	52.8903	1.98529	3.29864	6.82127	0.246584	16.2387	0.931969	100
	6.48	3.77	9.75	51.14	1.87	3.52	5.12	0.1555	16.95	0.7396	98.7555		6.56166	3.81751	9.87287	51.7845	1.89357	3.56436	5.18452	0.15746	17.1636	0.74892	100
	6.22	3.48	8.95	52.66	2.04	2.55	5.7	0.2153	15.5	1.0536	97.3153		6.3916	3.57601	9.19691	54.1128	2.09628	2.62035	5.85725	0.22124	15.9276	1.08267	100
	5.81	3.6	9.9	52.35	2.05	3.13	5.87	0.2575	15.94	0.9582	98.9075		5.87418	3.63976	10.0094	52.9282	2.07264	3.16457	5.93484	0.260344	16.1161	0.968784	100
FS	2.56	1.38	10.54	49.46	1.3046	6.71	12.97	0.1705	15.06	0.3374	100.155	20	2.55604	1.37786	10.5237	49.3834	1.30258	6.69961	12.9499	0.170236	15.0367	0.336878	100
	2.49	1.36	10.66	49.22	1.2836	6.54	12.79	0.2169	14.76	0.3416	99.3205		2.50704	1.3693	10.7329	49.5567	1.29238	6.58474	12.8775	0.218384	14.861	0.343937	100
	2.74	1.42	10.58	49.02	1.3143	6.58	12.96	0.3056	15.14	0.3126	100.06		2.73836	1.41915	10.5737	48.9907	1.31351	6.57606	12.9522	0.305417	15.1309	0.312413	100
	2.78	1.44	10.87	48.56	1.4077	6.65	12.49	0.2007	15.25	0.3498	99.6484		2.78981	1.44508	10.9084	48.7313	1.41267	6.67346	12.5341	0.201408	15.3038	0.351034	100
	2.7	1.39	10.72	48.98	1.2617	6.54	12.58	0.289	14.87	0.3186	99.3307		2.71819	1.39937	10.7922	49.31	1.2702	6.58407	12.6648	0.290947	14.9702	0.320747	100
	2.72	1.41	11.05	49.3	1.3245	6.64	12.72	0.188	14.98	0.3837	100.332		2.71099	1.40533	11.0134	49.1366	1.32011	6.618	12.6778	0.187377	14.9304	0.382428	100
	2.53	1.37	10.52	49.22	1.2744	6.82	13.23	0.1431	14.77	0.3085	99.8775		2.5331	1.37168	10.5329	49.2804	1.27596	6.82836	13.2462	0.143276	14.7881	0.308878	100
	2.49	1.4	10.26	49.02	1.293	6.6	12.78	0.2213	15.16	0.3203	99.2243		2.50947	1.41094	10.3402	49.4032	1.30311	6.6516	12.8799	0.22303	15.2785	0.322804	100
	2.74	1.56	11.37	49.42	1.4138	6.36	12.21	0.2509	15.09	0.3478	100.415		2.72868	1.55356	11.323	49.2159	1.40796	6.33373	12.1596	0.249864	15.0277	0.346364	100
	2.77	1.39	10.64	49.3	1.2864	6.51	12.79	0.1764	14.67	0.347	99.5328		2.783	1.39652	10.6899	49.5314	1.29244	6.54056	12.85	0.177228	14.7389	0.348629	100
	2.67	1.47	10.89	48.92	1.3921	6.4	12.54	0.2466	15.1	0.3963	99.6287		2.67995	1.47548	10.9306	49.1023	1.39729	6.42385	12.5867	0.247519	15.1563	0.397777	100
	2.59	1.39	11.04	48.8	1.3499	6.48	12.62	0.2217	15.29	0.2609	99.7816		2.59567	1.39304	11.0642	48.9068	1.35285	6.49418	12.6476	0.222185	15.3235	0.261471	100
	2.86	1.52	11.37	48.64	1.3735	6.36	12.4	0.2205	15.28	0.4067	100.024		2.85931	1.51964	11.3673	48.6283	1.37317	6.35847	12.397	0.220447	15.2763	0.406602	100
	2.76	1.36	10.9	49.01	1.3405	6.94	13.14	0.2183	14.75	0.3014	100.419		2.74849	1.35433	10.8545	48.8056	1.33491	6.91106	13.0852	0.21739	14.6885	0.300143	100
	2.77	1.38	9.95	49.02	1.3561	6.53	12.87	0.1594	15.15	0.3198	99.1855		2.79275	1.39133	10.0317	49.4225	1.36724	6.58362	12.9757	0.160709	15.2744	0.322426	100
	2.95	1.36	10.63	49.06	1.2379	6.62	12.74	0.197	14.88	0.3232	99.6749		2.95962	1.36444	10.6647	49.22	1.24194	6.64159	12.7816	0.197643	14.9285	0.324254	100
	3.04	1.53	11.26	48.91	1.3631	6.53	12.28	0.253	15.27	0.3832	100.436		3.0268	1.52336	11.2111	48.6976	1.35718	6.50165	12.2267	0.251901	15.2037	0.381536	100
	2.85	1.44	10.91	48.76	1.4029	6.4	12.39	0.1775	15.11	0.3279	99.4404		2.86604	1.4481	10.9714	49.0344	1.41079	6.43602	12.4597	0.178499	15.195	0.329745	100
	2.93	1.41	10.14	49.23	1.2822	6.56	12.93	0.2976	15.03	0.3385	99.8098		2.93558	1.41269	10.1593	49.3238	1.28464	6.5725	12.9546	0.298167	15.0586	0.339145	100
	2.84	1.48	11.19	48.82	1.3079	6.5	12.4	0.2164	14.86	0.4402	99.6143		2.851	1.48573	11.2333	49.009	1.31296	6.52517	12.448	0.217238	14.9175	0.441904	100
TV	2.56	1.38	10.54	49.46	1.3046	6.71	12.97	0.1705	15.06	0.3374	100.155	20	2.55604	1.37786	10.5237	49.3834	1.30258	6.69961	12.9499	0.170236	15.0367	0.336878	100
	2.49	1.36	10.66	49.22	1.2836	6.54	12.79	0.2169	14.76	0.3416	99.3205		2.50704	1.3693	10.7329	49.5567	1.29238	6.58474	12.8775	0.218384	14.861	0.343937	100
	2.74	1.42	10.58	49.02	1.3143	6.58	12.96	0.3056	15.14	0.3126	100.06		2.73836	1.41915	10.5737	48.9907	1.31351	6.57606	12.9522	0.305417	15.1309	0.312413	100
	2.78	1.44	10.87	48.56	1.4077	6.65	12.49	0.2007	15.25	0.3498	99.6484		2.78981	1.44508	10.9084	48.7313	1.41267	6.67346	12.5341	0.201408	15.3038	0.351034	100
	2.7	1.39	10.72	48.98	1.2617	6.54	12.58	0.289	14.87	0.3186	99.3307		2.71819	1.39937	10.7922	49.31	1.2702	6.58407	12.6648	0.290947	14.9702	0.320747	100
	2.72	1.41	11.05	49.3	1.3245	6.64	12.72	0.188	14.98	0.3837	100.332		2.71099	1.40533	11.0134	49.1366	1.32011	6.618	12.6778	0.187377	14.9304	0.382428	100
	2.53	1.37	10.52	49.22	1.2744	6.82	13.23	0.1431	14.77	0.3085	99.8775		2.5331	1.37168	10.5329	49.2804	1.27596	6.82836	13.2462	0.143276	14.7881	0.308878	100
	2.49	1.4	10.26	49.02	1.293	6.6	12.78	0.2213	15.16	0.3203	99.2243		2.50947	1.41094	10.3402	49.4032	1.30311	6.6516	12.8799	0.22303	15.2785	0.322804	100
	2.74	1.56	11.37	49.42	1.4138	6.36	12.21	0.2509	15.09	0.3478	100.415		2.72868	1.55356	11.323	49.2159	1.40796	6.33373	12.1596	0.249864	15.0277	0.346364	100
	2.77	1.39	10.64	49.3	1.2864	6.51	12.79	0.1764	14.67	0.347	99.5328		2.783	1.39652	10.6899	49.5314	1.29244	6.54056	12.85	0.177228	14.7389	0.348629	100
	2.67	1.47	10.89	48.92	1.3921	6.4	12.54	0.2466	15.1	0.3963	99.6287		2.67995	1.47548	10.9306	49.1023	1.39729	6.42385	12.5867	0.247519	15.1563	0.397777	100
	2.59	1.39	11.04	48.8	1.3499	6.48	12.62	0.2217	15.29	0.2609	99.7816		2.59567	1.39304	11.0642	48.9068	1.35285	6.49418	12.6476	0.222185	15.3235	0.261471	100
	2.86	1.52	11.37	48.64	1.3735	6.36	12.4	0.2205	15.28	0.4067	100.024		2.85931	1.51964	11.3673	48.6283	1.37317	6.35847	12.397	0.220447	15.2763	0.406602	100
	2.76	1.36	10.9	49.01	1.3405	6.94	13.14	0.2183	14.75	0.3014	100.419		2.74849	1.35433	10.8545	48.8056	1.33491	6.91106	13.0852	0.21739	14.6885	0.300143	100
	2.77	1.38	9.95	49.02	1.3561	6.53	12.87	0.1594	15.15	0.3198	99.1855		2.79275	1.39133	10.0317	49.4225	1.36724	6.58362	12.9757	0.160709	15.2744	0.322426	100
	2.95	1.36	10.63	49.06	1.2379	6.62	12.74	0.197	14.88	0.3232	99.6749		2.95962	1.36444	10.6647	49.22	1.24194	6.64159	12.7816	0.197643	14.9285	0.324254	100
	3.04	1.53	11.26	48.91	1.3631	6.53	12.28	0.253	15.27	0.3832	100.436		3.0268	1.52336	11.2111	48.6976	1.35718	6.50165	12.2267	0.251901	15.2037	0.381536	100
	2.85	1.44	10.91	48.76	1.4029	6.4	12.39	0.1775	15.11	0.3279	99.4404		2.86604	1.4481	10.9714	49.0344	1.41079	6.43602	12.4597	0.178499	15.195	0.329745	100
	2.93	1.41	10.14	49.23	1.2822	6.56	12.93	0.2976	15.03	0.3385	99.8098		2.93558	1.41269	10.1593	49.3238	1.28464	6.5725	12.9546	0.298167	15.0586	0.339145	100
	2.84	1.48	11.19	48.82	1.3079	6.5	12.4	0.2164	14.86	0.4402	99.6143		2.851	1.48573	11.2333	49.009	1.31296	6.52517	12.448	0.217238	14.9175	0.441904	100
M1	4.73	1.66	9.05	53.31	1.74	3.07	8.55	0.1211	17.86	0.8482	100.091	31	4.72569	1.65849	9.04176	53.2615	1.73842	3.06721	8.54222	0.12099	17.8437	0.847428	100
	4.72	2.48	10.13	52.55	1.92	3.13	6.12	0.2373	16.43	0.8372	97.7173		4.83026	2.53793	10.3666	53.7776	1.96485	3.20312	6.26296	0.242843	16.8138	0.856757	100
	4.31	2.16	9.68	52.26	1.99	4.14	7.72	0.1109	15.98	0.8473	98.3509		4.38227	2.19622	9.84231	53.1363	2.02337	4.20942	7.84945	0.11276	16.2479	0.861507	100
	3.73	2.38	9.76	52.36	2.07	4.05	8.34	0.1792	16.14	0.8175	99.0092		3.76733	2.40382	9.85767	52.884	2.09071	4.09053	8.42346	0.180993	16.3015	0.825681	100
	4.41	2.39	9.48	53.5	1.87	3.58	8.09	0.2637	16.64	0.7326	100.224		4.40016	2.38467	9.45884	53.3806	1.86583	3.57201	8.07194	0.263111	16.6029	0.730965	100
	4.77	2.45	8.94	52.96	1.85	3.3	7.42	0.2117	17.03	0.7595	98.9317		4.82151	2.47646	9.03654	53.5319	1.86998	3.33563	7.50012	0.213986	17.2139	0.767701	100
	5	2.59	9.79	51.43	1.98	3.74	7.34	0.1457	16.18	0.839	98.1957		5.09187	2.63759	9.96989	52.375	2.01638	3.80872	7.47487	0.148377	16.4773	0.854416	100
	4.57	1.58	10.16	50.9	1.6149	5.32	7.23	0.2295	17.17	0.7104	98.7744		4.6267	1.5996	10.2861	51.5316	1.63494	5.38601	7.31971	0.232348	17.383	0.719215	100
	4.77	2.32	9.22	52.66	1.94	3.14	6.97	0.2436	16.84	0.8686	98.1036		4.86221	2.36485	9.39823	53.6779	1.9775	3.2007	7.10473	0.248309	17.1655	0.885391	100
	4.42	1.93	10.25	51.19	2.02	3.4	7.79	0.2455	15.94	0.833	97.1855		4.548	1.98589	10.5468	52.6725	2.0785	3.49846	8.0156	0.25261	16.4016	0.857124	100
	4.93	2.1	9.22	53.02	1.81	3.27	8.23	0.2801	17.95	0.7306	100.81		4.89038	2.08312	9.14591	52.5939	1.79546	3.24372	8.16386	0.277849	17.8058	0.724729	100
	4.72	2.84	10.01	51.61	1.99	3.4	6.95	0.2432	16.3	0.869	98.0632		4.81322	2.89609	10.2077	52.6293	2.0293	3.46715	7.08727	0.248003	16.6219	0.886163	100
	5.12	2.41	8.93	53.18	1.96	3.35	7.55	0.2763	16.65	0.8938	99.4263		5.14954	2.42391	8.98153	53.4869	1.97131	3.36933	7.59356	0.277894	16.7461	0.898957	100
	4.86	2.19	10.22	51.03	2.01	3.3	7.08	0.2332	16.53	0.8297	97.4532		4.98701	2.24723	10.4871	52.3636	2.06253	3.38624	7.26503	0.239294	16.962	0.851383	100
	5.22	2.57	9.64	50.95	1.95	3.5	7.16	0.1928	16.64	0.8454	97.8228		5.33618	2.6272	9.85455	52.084	1.9934	3.5779	7.31936	0.197091	17.0103	0.864216	100
	4.77	2.05	9.55	51.76	1.79	3.08	7.66	0.2026	17.34	0.6496	98.2026		4.85731	2.08752	9.72479	52.7074	1.82276	3.13637	7.8002	0.206308	17.6574	0.66149	100
	4.53	2.92	10.33	53.65	1.82	2.79	6.29	0.27	16.94	0.9359	100.476		4.50854	2.90617	10.2811	53.3959	1.81138	2.77679	6.26021	0.268721	16.8598	0.931467	100
	4.84	2.4	9.5	53.48	1.83	3.1	7.04	0.1807	16.73	0.9258	100.026		4.83872	2.39936	9.49748	53.4658	1.82952	3.09918	7.03813	0.180652	16.7256	0.925555	100
	4.64	2.38	9.94	54.34	1.6015	2.66	6.57	0.1446	17.04	0.8503	100.166		4.63229	2.37605	9.92349	54.2497	1.59884	2.65558	6.55909	0.14436	17.0117	0.848887	100
	4.48	2.22	10.61	53.07	1.91	3.11	7.14	0.2394	17.2	0.8335	100.813		4.44388	2.2021	10.5244	52.6421	1.8946	3.08492	7.08243	0.23747	17.0613	0.826779	100
	4.3	2.2	10.11	52.61	2.07	3.64	8.4	0.3004	15.6	0.8702	100.101		4.29568	2.19779	10.0998	52.5571	2.06792	3.63634	8.39156	0.300098	15.5843	0.869325	100
	4.72	2.39	9.22	53.59	1.77	3.52	7.41	0.2606	16.9	0.8831	100.664		4.68888	2.37424	9.15921	53.2367	1.75833	3.49679	7.36114	0.258882	16.7886	0.877278	100
	4.47	2.62	10.37	52.89	1.9	3.31	7.01	0.1868	16.43	0.731	99.9178		4.47368	2.62216	10.3785	52.9335	1.90156	3.31272	7.01577	0.186954	16.4435	0.731601	100
	4.47	1.93	12.91	51.51	1.79	3.44	7.51	0.3191	16.08	0.7889	100.748		4.43681	1.91567	12.8142	51.1276	1.77671	3.41446	7.45424	0.316731	15.9606	0.783043	100
	4.32	1.67	9.89	53.15	1.84	2.44	7.5	0.1473	18.84	0.5867	100.384		4.30347	1.66361	9.85217	52.9467	1.83296	2.43067	7.47131	0.146737	18.7679	0.584456	100
	4.91	2.33	8.3	53.48	1.6032	2.56	7.63	0.1936	18.36	0.6671	100.034		4.90834	2.32921	8.29719	53.4619	1.60266	2.55913	7.62741	0.193534	18.3538	0.666874	100
	4.7	1.71	10.22	53.53	1.78	4.1	6.92	0.1831	16.97	0.716	100.829		4.66135	1.69594	10.136	53.0898	1.76536	4.06629	6.8631	0.181594	16.8305	0.710112	100
	4.65	1.71	10.81	52.31	1.95	3.17	3.8	0.2099	16.52	0.7667	95.8966		4.84897	1.78317	11.2726	54.5483	2.03344	3.30564	3.9626	0.218882	17.2269	0.799507	100
	4.9	1.58	9.31	53.81	1.84	2.86	7.72	0.1269	18.32	0.8005	101.267		4.83867	1.56023	9.19348	53.1365	1.81697	2.82421	7.62338	0.125312	18.0907	0.790481	100
	4.79	1.36	8.55	53.94	1.78	3.06	6.98	0.3147	18.42	0.7581	99.9528		4.79226	1.36064	8.55404	53.9655	1.78084	3.06145	6.9833	0.314849	18.4287	0.758458	100
	4.27	2.38	10.51	52.5	1.97	4	8.6	0.0807	15.39	0.7656	100.466		4.25018	2.36895	10.4612	52.2563	1.96086	3.98143	8.56008	0.0803254	15.3186	0.762047	100
D2a	5.42	4.05	5.74	61.4	1.5625	1.3421	2.87	0.2369	15.36	0.443	97.9815	9	5.53166	4.13343	5.85825	62.6649	1.59469	1.36975	2.92912	0.24178	15.6764	0.452126	100
	5.56	4.17	4.95	61.7	1.4432	1.4105	2.72	0.1803	15.89	0.394	98.024		5.67208	4.25406	5.04978	62.9438	1.47229	1.43893	2.77483	0.183935	16.2103	0.401942	100
	5.21	5.12	4.49	62.1	1.1666	0.8501	1.93	0.1187	14.21	0.4527	95.1954		5.47295	5.37841	4.71661	65.2342	1.22548	0.893005	2.02741	0.124691	14.9272	0.475548	100
	5.49	4.5	4.79	64.53	1.2412	0.9417	1.97	0.2043	14.96	0.2981	98.6272		5.56642	4.56264	4.85667	65.4282	1.25848	0.954808	1.99742	0.207144	15.1682	0.302249	100
	5.7	4.31	5.18	64.08	1.2685	1.0038	2.08	0.2243	15.29	0.2703	99.1366		5.74964	4.34754	5.22511	64.6381	1.27955	1.01254	2.09812	0.226253	15.4232	0.272654	100
	6.13	4.19	4.83	63.08	1.3884	1.1204	2.29	0.0968	15.22	0.2325	98.3456		6.23312	4.26049	4.91125	64.1412	1.41176	1.13925	2.32852	0.0984284	15.476	0.236411	100
	5.62	4.3	3.93	62.9	1.2212	1.1206	2.27	0.127	15.22	0.307	96.7088		5.81126	4.44634	4.06375	65.0406	1.26276	1.15874	2.34725	0.131322	15.738	0.317448	100
	5.82	4.28	4.43	64.66	1.244	0.9853	1.93	0.2237	15.09	0.2157	98.663		5.89887	4.338	4.49003	65.5362	1.26086	0.998652	1.95615	0.226731	15.2945	0.218623	100
	6.18	3.56	3.97	61.44	0.9628	1.1681	2.95	0.1912	17.15	0.2206	97.5721		6.33378	3.64858	4.06879	62.9688	0.986757	1.19717	3.02341	0.195958	17.5767	0.226089	100
D2b	6.09	3.29	4.75	61.19	1.2778	1.67	3.69	0.2959	17.04	0.4558	99.2937	15	6.13332	3.3134	4.78379	61.6253	1.28689	1.68188	3.71625	0.298005	17.1612	0.459042	100
	5.62	3.39	5.47	61.26	1.2555	1.5407	3.32	0.2453	16.45	0.3271	98.5515		5.7026	3.43983	5.5504	62.1604	1.27395	1.56335	3.3688	0.248905	16.6918	0.331908	100
	5.82	3.32	5.02	61.15	1.3546	1.76	3.6	0.1865	16.62	0.4321	98.8311		5.88883	3.35927	5.07937	61.8732	1.37062	1.78082	3.64258	0.188706	16.8166	0.437211	100
	5.94	3.41	4.83	57.93	1.1688	1.5003	3.19	0.2301	15.92	0.3254	94.1192		6.31115	3.62307	5.13179	61.5496	1.24183	1.59404	3.38932	0.244477	16.9147	0.345732	100
	5.9	3.22	5.19	60.44	1.3225	1.85	3.55	0.2056	16.94	0.4652	98.6181		5.98267	3.26512	5.26273	61.2869	1.34103	1.87592	3.59974	0.208481	17.1774	0.471719	100
	6.23	3.54	4.79	60.27	1.2816	1.6234	3.47	0.2219	16.6	0.3708	98.0269		6.3554	3.61125	4.88641	61.4831	1.3074	1.65608	3.53984	0.226366	16.9341	0.378264	100
	6.02	3.32	5.08	60.93	1.1898	1.71	3.36	0.2075	16.62	0.3875	98.4373		6.11557	3.37271	5.16065	61.8973	1.20869	1.73715	3.41334	0.210794	16.8838	0.393652	100
	6.49	3.17	4.83	61.16	1.1891	1.68	3.53	0.2598	16.96	0.452	99.2689		6.5378	3.19335	4.86557	61.6104	1.19786	1.69237	3.556	0.261713	17.0849	0.455329	100
	6.12	3.18	4.92	61.01	1.2195	1.6166	3.52	0.2255	16.74	0.4036	98.5516		6.20994	3.22674	4.99231	61.9067	1.23742	1.64036	3.57173	0.228814	16.986	0.409532	100
	6.2	3.22	5.1	61.29	1.2516	1.7	3.6	0.1878	16.68	0.3401	99.2294		6.24815	3.24501	5.13961	61.766	1.26132	1.7132	3.62796	0.189258	16.8095	0.342741	100
	6.14	3.25	4.69	61.15	1.1931	1.5958	3.42	0.1828	16.87	0.3611	98.4917		6.23403	3.29977	4.76182	62.0864	1.21137	1.62024	3.47237	0.185599	17.1283	0.36663	100
	6.13	3.09	5.58	60.42	1.33	1.79	3.84	0.178	16.97	0.3395	99.328		6.17147	3.11091	5.61775	60.8288	1.339	1.80211	3.86598	0.179204	17.0848	0.341797	100
	6.27	3.12	5.39	60.53	1.3005	1.67	3.62	0.2384	16.67	0.3616	98.8089		6.34558	3.15761	5.45497	61.2597	1.31618	1.69013	3.66364	0.241274	16.8709	0.365959	100
	6.33	3.23	4.94	60.33	1.1744	1.6351	3.58	0.2127	16.93	0.3725	98.3622		6.4354	3.28378	5.02225	61.3345	1.19395	1.66233	3.63961	0.216242	17.2119	0.378702	100
	5.9	3.25	4.66	61.08	1.2506	1.6285	3.51	0.1183	16.99	0.3243	98.3874		5.9967	3.30327	4.73638	62.0811	1.2711	1.65519	3.56753	0.120239	17.2685	0.329615	100
D1b	6.32	3.45	4.67	61.35	1.1856	1.4496	3.28	0.145	16.99	0.3153	98.8402	20	6.39416	3.49048	4.7248	62.0699	1.19951	1.46661	3.31849	0.146701	17.1894	0.319	100
	6.53	3.54	4.47	61.9	1.0788	1.3694	3.01	0.2145	17.07	0.2785	99.1827		6.58381	3.56917	4.50683	62.4101	1.08769	1.38068	3.0348	0.216268	17.2107	0.280795	100
	5.8	3.63	4.81	61.97	1.1041	1.4266	3.05	0.1239	16.99	0.3267	98.9046		5.86424	3.6702	4.86327	62.6563	1.11633	1.4424	3.08378	0.125272	17.1782	0.330318	100
	6.13	3.47	4.57	61.55	1.1476	1.5218	3.3	0.2271	16.9	0.3566	98.8165		6.20342	3.51156	4.62473	62.2872	1.16134	1.54003	3.33952	0.22982	17.1024	0.360871	100
	6.27	3.35	4.64	61.15	1.1974	1.5698	3.32	0.2701	17.1	0.4668	98.8673		6.34183	3.38838	4.69316	61.8506	1.21112	1.58778	3.35804	0.273194	17.2959	0.472148	100
	5.95	3.57	4.52	61.9	1.1188	1.3929	3.01	0.1962	17.12	0.3053	98.7779		6.02361	3.61417	4.57592	62.6658	1.13264	1.41013	3.04724	0.198627	17.3318	0.309077	100
	6.38	3.52	4.38	61.29	1.1316	1.424	3.17	0.1943	17	0.3038	98.4899		6.47782	3.57397	4.44716	62.2297	1.14895	1.44583	3.2186	0.197279	17.2607	0.308458	100
	6.38	3.64	4.35	62.42	1.0875	1.4424	3.03	0.1241	17.41	0.253	99.884		6.38741	3.64423	4.35505	62.4925	1.08876	1.44408	3.03352	0.124244	17.4302	0.253294	100
	6.44	3.55	4.56	61.6	1.0944	1.3971	3.21	0.1298	17.32	0.229	99.3013		6.48531	3.57498	4.59208	62.0334	1.1021	1.40693	3.23259	0.130713	17.4419	0.230611	100
	6.11	3.49	4.69	61.14	1.1154	1.462	3.32	0.235	17.07	0.3223	98.6324		6.19472	3.53839	4.75503	61.9877	1.13087	1.48227	3.36603	0.238258	17.3067	0.326769	100
	6.17	3.3	5.11	60.48	1.2438	1.75	3.66	0.3724	17.33	0.3386	99.4162		6.20623	3.31938	5.14001	60.8352	1.2511	1.76028	3.68149	0.374587	17.4318	0.340588	100
	6.18	3.41	4.6	61.08	1.1149	1.4724	3.21	0.2476	16.98	0.3188	98.2949		6.2872	3.46915	4.6798	62.1395	1.13424	1.49794	3.26568	0.251895	17.2745	0.32433	100
	6.38	3.44	4.75	61.34	1.1619	1.52	3.31	0.1421	17.1	0.2789	99.144		6.43508	3.4697	4.79101	61.8696	1.17193	1.53312	3.33858	0.143327	17.2476	0.281308	100
	5.87	3.28	4.35	59.69	1.1937	1.5234	3.42	0.2774	16.82	0.3079	96.4245		6.08766	3.40163	4.5113	61.9034	1.23796	1.57989	3.54682	0.287686	17.4437	0.319317	100
	6.24	3.33	5.31	59.95	1.2358	1.69	3.55	0.3165	16.93	0.3833	98.5523		6.33166	3.37892	5.388	60.8306	1.25395	1.71483	3.60215	0.321149	17.1787	0.388931	100
	6.45	3.36	4.95	60.87	1.2196	1.6264	3.41	0.1308	17.39	0.3288	99.4068		6.48849	3.38005	4.97954	61.2332	1.22688	1.63611	3.43035	0.131581	17.4938	0.330762	100
	6.21	3.53	4.25	60.93	1.0781	1.4744	3.25	0.1044	17.12	0.2508	97.9469		6.34017	3.60399	4.33909	62.2072	1.1007	1.50531	3.31812	0.106588	17.4789	0.256057	100
	6.41	3.42	4.86	61.68	1.1983	1.5431	3.32	0.1397	17.23	0.3525	99.8011		6.42277	3.42682	4.86969	61.8029	1.20069	1.54618	3.32662	0.139978	17.2643	0.353203	100
	5.88	3.35	4.81	60.57	1.204	1.6458	3.47	0.1889	17.03	0.3879	98.1487		5.99091	3.41319	4.90073	61.7125	1.22671	1.67684	3.53545	0.192463	17.3512	0.395217	100
	6.33	3.45	4.79	61.07	1.2226	1.5697	3.32	0.2387	17.08	0.3472	99.071		6.38936	3.48235	4.83492	61.6427	1.23406	1.58442	3.35113	0.240938	17.2402	0.350456	100
Lapilli D1b	6.14	3.52	4.52	60.86	1.1539	1.3942	3.38	0.1669	17.4	0.3834	98.535	10	6.23129	3.57233	4.5872	61.7649	1.17106	1.41493	3.43025	0.169381	17.6587	0.3891	100
	6.16	3.35	4.51	59.27	1.1376	1.6226	3.51	0.0559	16.94	0.3775	96.5561		6.37971	3.46949	4.67086	61.384	1.17818	1.68047	3.63519	0.0578938	17.5442	0.390964	100
	6.46	3.54	4.62	59.38	1.0983	1.4437	3.08	0.2279	17.09	0.2177	96.9399		6.66392	3.65175	4.76584	61.2544	1.13297	1.48927	3.17723	0.235094	17.6295	0.224572	100
	6.27	3.42	4.2	60.89	1.0997	1.5066	3.27	0.111	17.09	0.3415	97.8573		6.40729	3.49488	4.29196	62.2233	1.12378	1.53959	3.3416	0.11343	17.4642	0.348978	100
	6.36	3.37	4.89	60.41	1.158	1.605	3.44	0.2019	16.67	0.3216	98.1049		6.48286	3.4351	4.98446	61.5769	1.18037	1.636	3.50645	0.2058	16.992	0.327812	100
	6.09	3.46	4.73	61.23	1.1964	1.5499	3.34	0.2304	17.06	0.3432	98.8867		6.15856	3.49895	4.78325	61.9193	1.20987	1.56735	3.3776	0.232994	17.2521	0.347064	100
	6.18	3.42	5.14	60.96	1.1249	1.572	3.32	0.1719	16.93	0.2496	98.8188		6.25387	3.46088	5.20144	61.6887	1.13835	1.59079	3.35968	0.173955	17.1324	0.252584	100
	5.89	3.22	4.59	56.88	1.1305	1.5427	3.19	0.1669	15.76	0.334	92.3701		6.37652	3.48598	4.96914	61.5784	1.22388	1.67013	3.4535	0.180686	17.0618	0.361589	100
	5.93	3.28	4.88	58.78	1.184	1.5798	3.49	0.0852	16.51	0.3704	95.719		6.19522	3.4267	5.09826	61.4089	1.23695	1.65046	3.64609	0.0890105	17.2484	0.386966	100
	6.19	3.39	4.92	60.99	1.1955	1.602	3.51	0.1891	17.17	0.2933	99.1566		6.24265	3.41883	4.96185	61.5088	1.20567	1.61563	3.53986	0.190708	17.316	0.295795	100
D1a	6.21	3.13	5.61	60.1	1.2905	1.85	3.8	0.2348	16.87	0.4564	99.0953	11	6.26669	3.15858	5.66122	60.6487	1.30228	1.86689	3.83469	0.236944	17.024	0.460567	100
	5.96	3.25	4.69	61	1.0714	1.4927	3.4	0.178	16.85	0.3149	97.8921		6.08834	3.31998	4.79099	62.3135	1.09447	1.52484	3.47321	0.181833	17.2128	0.321681	100
	5.99	3.36	5.39	60.83	1.2218	1.6098	3.47	0.1184	16.71	0.3015	98.7		6.0689	3.40426	5.46099	61.6312	1.23789	1.631	3.5157	0.119959	16.9301	0.305471	100
	6.04	3.55	4.13	62.73	1.0084	1.1833	2.7	0.1014	16.86	0.2315	98.3031		6.14426	3.61128	4.20129	63.8128	1.02581	1.20373	2.74661	0.10315	17.151	0.235496	100
	5.72	3.14	5.65	60.47	1.3146	1.94	3.98	0.213	17.05	0.419	99.4776		5.75004	3.15649	5.67967	60.7876	1.3215	1.95019	4.0009	0.214119	17.1395	0.4212	100
	6	3.41	4.64	61.36	1.1387	1.4761	3.3	0.1419	16.98	0.2392	98.4467		6.09467	3.4638	4.71321	62.3281	1.15667	1.49939	3.35207	0.144139	17.2479	0.242974	100
	6.13	3.49	3.99	62.95	0.9727	1.2377	2.73	0.1748	17.19	0.299	98.8652		6.20036	3.53006	4.0358	63.6726	0.983865	1.25191	2.76134	0.176806	17.3873	0.302432	100
	6.21	3.54	3.97	62.05	0.9349	1.2	2.65	0.1129	16.98	0.2332	97.6478		6.35959	3.62527	4.06563	63.5447	0.95742	1.22891	2.71383	0.11562	17.389	0.238817	100
	6.34	3.05	5.41	58.95	1.2976	1.84	3.95	0.1442	16.66	0.4221	97.6418		6.49312	3.12366	5.54066	60.3737	1.32894	1.88444	4.0454	0.147683	17.0624	0.432294	100
	6.34	3.48	3.84	62.03	1.0089	1.282	2.77	0.2008	16.48	0.2764	97.4317		6.50712	3.57173	3.94122	63.6651	1.03549	1.31579	2.84302	0.206093	16.9144	0.283686	100
	6.13	3.09	4.67	61.44	1.1276	1.4865	3.37	0.181	17.12	0.3159	98.6151		6.21609	3.13339	4.73558	62.3028	1.14344	1.50738	3.41733	0.183542	17.3604	0.320336	100

## Sheet: Supplementary Table B
Supplementary Table B: Averaged glass shard geochemical composition and standard deviations measured with electron microprobe. Point counting results, appearance in the cores of all investigated samples and correlated onshore tephra.
Glass shard geochemical composition and standard deviations														Point counting				Appearance in core [grainsize, thickness, contact] and BSE		Correlated onshore tephra	Calculated ages for primary layers [yr BP]
Sample		Na2O	K2O	FeOt	SiO2	TiO2	MgO	CaO	MnO	Al2O3	P2O5	Total	# Glass shards succesfully analysed by EMP	glass shards	Other volca-nics/minerals	Orga-nics	glass shards vol%
		[wt%]	[wt%]	[wt%]	[wt%]	[wt%]	[wt%]	[wt%]	[wt%]	[wt%]	[wt%]	[wt%]
M178-10 273 cm	average	5.104	2.637	10.122	49.934	2.004	4.021	8.292	0.18108	16.662	0.93355	98.9571	10					coarse, ~2 cm, erosive contact		MB3	3518
	standard deviation	0.253693	0.0561842	0.511573	0.338401	0.0241293	0.109793	0.136691	0.041302	0.164708	0.029759	0.502638
M178-10 305 cm	average	2.766	1.407	10.912	48.472	1.40188	6.384	12.434	0.22254	14.857	0.36295	98.8564	10					coarse, ~2 cm, not continous, erosive contact		FS
	standard deviation	0.155435	0.0416467	0.392111	0.369618	0.0626512	0.137534	0.172446	0.0671359	0.366092	0.0428398	0.814765
M178-10 364 cm	average	5.008	2.804	10.562	50.565	2.113	3.644	7.704	0.21487	16.177	0.88567	99.6775	20					sharp contact		MB1	8008
	standard deviation	0.825507	0.524811	0.72758	0.832229	0.202103	0.353151	0.673831	0.0742731	0.748718	0.102379	0.782897
M178-11 244 cm	average	5.03947	2.71737	10.0395	50.2116	2.03316	3.91632	8.01105	0.196321	16.5284	0.947789	98.6932	20	58	130	21	27.8	coarse, ~3 cm, pinching out, erosional contact		MB3	3487
	standard deviation	0.26603	0.308722	0.432595	0.653234	0.0638621	0.274979	0.693613	0.0343198	0.383221	0.0780722	0.603009
M178-11 275 cm	average	2.859	1.424	11.181	48.488	1.41255	6.356	12.303	0.219	14.842	0.35014	99.0845	10					coarse, ~2 cm, bottom: sharp		FS
	standard deviation	0.145178	0.0756013	0.52227	0.450895	0.0770136	0.151819	0.321491	0.0473509	0.242524	0.0575319	0.682882
M178-11 341 cm	average	5.44	2.89667	10.6067	50.8	2.09667	3.38333	7.38333	0.2485	16.1233	1.08303	100.062	3					sharp contact, ~ 3 cm
	standard deviation	0.265141	0.0750555	0.497226	0.363456	0.083865	0.0568624	0.0814453	0.0753442	0.113725	0.0284511	0.623523
M178-11 377 cm	average	5.02667	1.7176	5.85653	54.5333	1.15683	1.6028	8.29	0.116967	21.81	0.599067	100.71	3					lense, 1 cm
	standard deviation	0.497226	1.19549	4.55772	1.03273	0.950256	1.51814	2.17869	0.112978	5.48079	0.565416	0.933783
M178-12 29 cm	average	6.485	3.025	6.755	56.215	1.68055	1.77715	4.85	0.19475	16.88	0.7518	98.6142	2
	standard deviation	0.00707107	0.431335	3.40118	6.28618	0.465913	1.38996	1.25865	0.0770039	0.537401	0.27662	0.484156
M178 12 40 cm	average	5.18	3.805	9.045	52.1475	1.72075	2.7875	6.105	0.165475	16.2925	0.7589	98.0076	6					coarse, ~10 cm, erosional contact
	standard deviation	0.690555	2.14446	1.53624	1.3888	0.762803	0.801015	1.52391	0.0517421	1.0556	0.190843	1.12252
M178-12 99 cm	average												0					coarse, ~1,5 cm, erosional contact; no glass shards
	standard deviation
M178-12 209.5 cm	average	5.12929	2.53857	10.0379	50.0414	2.05429	3.57571	7.67643	0.203643	16.0971	0.895279	98.2496	14					erosional contact		TV
	standard deviation	0.445619	0.235694	0.673569	0.836521	0.204025	0.40264	0.776626	0.0350412	0.601005	0.0989387	1.3987
M178-12 446 cm	average	5.01125	2.63875	10.24	50.3113	2.17	4.02875	8.2375	0.17025	15.815	0.802638	99.4254	8					fine, ~1 cm, erosional contact
	standard deviation	0.659208	0.953287	0.900999	2.55217	0.129394	1.26402	2.00227	0.0706497	1.47898	0.133179	0.383737
M178-12 477 cm	average	4.1525	2.06	10.905	48.8675	2.005	3.55	9.03	0.1368	16.6125	0.8042	98.1235	4					coarse, 6 cm, sharp contact
	standard deviation	1.25985	0.61498	0.837038	1.18722	0.134288	0.531852	1.40445	0.0246756	1.30592	0.161504	1.85113
M178-12 482 cm	average	5.44115	3.06645	7.715	54.016	1.73917	3.60151	7.067	0.18304	15.019	0.63758	97.8483	10					medium, ~4 cm
	standard deviation	1.88553	1.3549	2.67413	6.14066	0.395792	3.60969	6.0907	0.0647705	2.86471	0.384349	1.45453
M178-14 60 cm	average	2.94505	1.65005	5.2843	25.4825	1.0628	1.70865	31.515	0.09805	7.8458	0.4909	78.0831	2					fine, ~6 cm, erosional contact
	standard deviation	3.95266	2.3051	7.39026	35.96	1.49511	2.32122	34.5422	0.138664	11.0651	0.694237	30.7801
M178-14 66 cm	average	5.675	2.895	9.879	51.25	1.95833	3.082	6.942	0.20448	16.07	0.90468	98.8605	20					coarse, ~5 cm, sharp contact		FV
	standard deviation	0.43485	0.741069	0.784778	1.06027	0.140714	0.399105	1.06331	0.0592908	0.864896	0.145501	0.814143
M178-14 71 cm	average												0					lense, 1 cm, erosional
	standard deviation
M178-14 99 cm	average												0					lense, 1 cm
	standard deviation
M178-14 107.5 cm	average												0					lense, 5 cm
	standard deviation
M178-14 181 cm	average	5.50286	3.13857	10.3814	51.3986	2.05571	3.2	6.96429	0.244657	15.8157	0.9896	99.6914	7					coarse, 5 cm, sharp contact		FF
	standard deviation	0.575723	0.561232	0.46366	0.674918	0.0461364	0.403567	0.801974	0.0426137	0.698662	0.122477	0.753203
M178-14 320 cm	average	5.12737	2.72105	9.46579	50.3474	1.93474	3.79632	7.79684	0.193732	16.2863	0.881689	98.5513	19					coarse, ~12 cm, erosive contact		TV
	standard deviation	0.261212	0.302414	0.44013	0.927223	0.0577705	0.270806	0.517086	0.0581533	0.251511	0.0795789	1.00422
M178-14 327 cm	average												0
	standard deviation
M178-14 346.5 cm	average	5.58333	3.14333	8.19333	53.15	1.4618	2.6616	6.91	0.182333	16.44	1.03277	98.7585	3					fine, 1 cm, erosive contact
	standard deviation	0.330807	0.619785	3.48362	2.06175	0.366367	1.19086	0.818352	0.114833	1.53307	0.267759	1.07198
M178-14 415cm	average	3.7715	1.91276	10.876	49.0635	1.65053	5.3045	10.671	0.20712	15.4285	0.574655	98.8854	20	40	122	21	21.9	coarse, ~2 cm, pinching out, sharp contact
	standard deviation	1.20169	0.70373	0.516327	0.891086	0.351113	1.2732	2.24976	0.0495372	0.503611	0.279237	0.698538
M178-14 463 cm	average	5.8075	3.59	10.0613	51.2119	2.12375	3.29312	6.35688	0.238275	15.8331	1.02043	98.5158	20	28	124	3	18.1	medium, ~1 cm, sharp contact			8011
	standard deviation	0.506248	0.741323	0.774113	0.987888	0.157686	0.338914	0.824037	0.0289487	0.5656	0.0833908	1.17581
M178 14 467 cm	average	6.05	3.18	5.18	61.02	1.2416	1.5009	3.21	0.2408	16.39	0.396	98.4093	1					medium, 6 cm, erosive contact
	standard deviation
M178-14 498 cm	average	5.425	2.95	4.36495	26.4434	0.8552	3.285	5.89	0.13215	8.7534	0.4523	58.5514	2					lense, fine, 0.5 cm, erosive contact
	standard deviation	0.487904	0.0565685	6.1024	35.8596	1.20887	0.00707107	0.410122	0.186888	12.3696	0.639649	56.2256
M178-14 507 cm	average	5.08714	3.39714	9.99286	52.24	0.925829	3.25571	6.27571	0.217343	16.2929	2.14	99.8246	7					coarse, 0.5 cm, sharp contact
	standard deviation	1.06298	0.732023	0.598574	1.67685	0.190332	0.433277	1.24317	0.0558328	0.386036	0.0778888	0.570458
M178-14 508.5 cm	average	5.425	1.85743	5.74658	54.26	0.458017	1.86097	7.49	0.1187	20.8017	1.08865	99.107	6					coarse, 0.5 cm, sharp contact
	standard deviation	0.686229	1.32585	3.8991	2.45738	0.393991	1.52569	2.27823	0.0861901	5.4755	0.773681	4.17479
M178-14 521 cm	average												0					fine, 0.5 cm, sharp contact
	standard deviation
M178-14 539 cm	average	5.2725	2.69	9.3025	51.05	2.055	3.17	7.285	0.232875	16.3775	0.9545	98.3899	9					coarse, 0.5 cm, erosive contact
	standard deviation	0.815818	0.314113	0.453018	1.47083	0.271355	0.531225	1.76915	0.0456846	0.529426	0.163154	0.876422
M178-14 597 cm	average	6.51667	4.57	9.22333	52.7733	0.945833	2.1788	5.04333	0.257967	16.6567	2.12333	100.289	3					coarse, 0.5 cm, erosive contact
	standard deviation	1.40603	1.47309	0.923057	0.382797	0.147873	0.792604	1.87602	0.113799	0.675302	0.362537	0.287262
M178-15 187cm	average	5.0663	2.68778	10.123	49.4681	2.02037	4.02	8.23296	0.200385	16.4626	0.930252	98.2815	27	72	129	12	33.8	coarse, ~1 cm, bottom: erosive		MB3	3633
	standard deviation	0.200981	0.0880268	0.450571	0.856213	0.0622947	0.119228	0.178365	0.0374957	0.330496	0.0539822	0.686766
M178-15 487 cm	average	4.225	2.65	10.77	48.515	0.8348	4.0575	8.225	0.203725	16.66	2.4725	98.6135	4					fine, 0.5 cm, erosive contact
	standard deviation	0.874433	0.476795	0.802496	1.43621	0.14099	0.545733	0.924356	0.0539294	0.211818	0.380208	1.81409
M178-15 559 cm	average	5.4125	2.5475	10.2725	50.77	1.8875	3.43	7.495	0.196	16.07	0.897825	98.9788	4					coarse, 0.5 cm, sharp contact
	standard deviation	0.630628	0.430455	1.42881	2.17686	0.0921502	0.631717	1.53342	0.0459808	0.481871	0.0399017	0.607375
M178-15 630 cm	average	6.00267	2.90333	9.852	51.5407	2.042	3.09733	6.61467	0.23654	15.762	1.03822	98.0512	15	46	142	6	23.7	coarse lense with fine ash, ~2 cm, erosional contact		M1
	standard deviation	0.449849	0.227272	0.413041	0.372759	0.0634935	0.205616	0.237573	0.0380767	0.282595	0.0955539	0.607696
M178-18 surface ash	average	4.7325	3.33125	10.525	50.2987	2.09875	3.26	7.62875	0.250638	16.0275	0.958787	99.1119	8					sharp contact		MB4	344
	standard deviation	0.389789	0.511369	0.618547	1.11768	0.101761	0.402989	0.630452	0.080539	0.736667	0.0979088	0.842977
M178-18 114.5 cm	average	5.37917	2.78083	9.66167	51.2267	1.90031	3.13333	7.08583	0.229425	16.2783	0.815108	98.4907	12					coarse, 1 cm, sharp contact		FV
	standard deviation	0.579944	0.35824	1.01905	1.16023	0.151497	0.624941	0.914037	0.0585602	0.806821	0.0838351	0.842632
M178-18 123.5 cm	average	6.15783	3.1013	7.39739	54.1826	1.65695	2.56497	5.43565	0.196022	16.9335	0.681457	98.3077	23					fine, 1 cm, erosional contact		FG
	standard deviation	0.425088	0.357164	0.821308	1.09029	0.179015	0.367227	0.910119	0.051961	0.541493	0.163892	0.635072
M178-18 187 cm	average	5.65	3.05667	9.96667	52.4367	2.06667	2.98667	6.27333	0.204233	16.3167	0.915433	99.873	3					coarse, 3 cm, sharp
	standard deviation	0.400375	0.330202	1.14527	1.73117	0.117189	0.437531	0.755006	0.0655906	0.38371	0.0896189	0.23323
M178-18 189 cm	average	5.94	3.042	8.668	53.55	1.906	2.842	5.99	0.24266	16.192	0.89936	99.272	5					coarse, 2 cm, sharp contact		FL
	standard deviation	0.214709	0.561712	0.649515	0.548407	0.151427	0.213588	0.473973	0.0246153	0.528697	0.0871915	0.505492
M178-18 210 cm	average	5.28733	2.98	10.2893	50.558	2.074	3.63467	7.57533	0.195593	16.1593	0.9564	98.7536	15	31	214	3	12.5	medium, ~5 cm, sharp
	standard deviation	0.781934	0.407361	0.547272	1.09517	0.0909317	0.475693	1.24227	0.0571468	0.485173	0.12357	0.655932
M178-18 214 cm	average	6.62	3.20667	6.26	57.34	0.861633	1.57307	4.44333	0.1872	18.3	0.443233	99.2351	3					lense, medium, 0.5 cm, erosional contact
	standard deviation	0.223383	0.136137	1.97707	2.55024	0.390149	0.452343	0.760022	0.0918079	0.566304	0.306405	0.596275
M178-18 244 cm	average	5.205	2.9	9.795	50.95	2.11	3.335	7.155	0.1653	16.715	1.2166	99.5469	2					medium, 4 cm, erosional contact
	standard deviation	0.388909	0.155563	0.247487	1.8809	0.0989949	0.289914	0.33234	0.036911	1.26572	0.116107	0.493561
M178-29 252 cm	average	5.06	3.37667	9.83667	50.5367	2.06667	3.50667	6.16333	0.2165	15.8767	1.04387	97.6837	10					fine, 2 cm, sharp contact
	standard deviation	0.755447	1.39012	0.301386	0.835125	0.0493288	0.604511	1.7864	0.0679303	0.414045	0.260669	0.18353
M178-29 280 cm	average	5.89	3.1	10.06	51.21	2.03	2.98	6.55	0.3116	15.71	1.0625	98.9041	1					fine, 2cm, erosional contact
	standard deviation
M178-29 292 cm	average	5.63375	3.02	9.325	50.89	2.18	3.35	7.08	0.217562	16.5263	0.943288	98.2226	8					medium, ~2 cm, sharp contact		MB2	8322
	standard deviation	0.709928	0.475635	0.784329	1.10504	0.242664	0.547957	1.05866	0.0474254	0.866156	0.151256	0.5941
M178-29 313 cm	average	4.502	1.97	10.698	51.384	2.368	3.986	7.612	0.21456	15.73	0.74122	99.2058	5					medium, 2 cm, sharp contact
	standard deviation	0.840369	0.19532	1.38068	0.552114	0.273898	0.416989	1.00542	0.0348329	1.05577	0.105794	0.388864
M178-29 330 cm	average	5.5325	2.9625	9.2025	50.5425	1.935	3.2525	6.44	0.2173	16.26	0.893625	97.2384	4					coarse, 1.5 cm, sharp contact
	standard deviation	0.276933	0.139134	0.724724	1.48111	0.193993	0.62994	0.194079	0.0598984	0.656303	0.249983	0.828131
M178-29 357 cm	average	5.335	2.915	10.24	50.03	2.1275	3.3975	7.0125	0.175225	16.21	0.89595	98.3387	4					lense, medium, 1 cm, sharp contact
	standard deviation	0.62703	0.596015	0.981054	1.53071	0.165202	0.364177	0.846931	0.0401294	1.08505	0.229396	1.69934
M178-29 366 cm	average	5.8025	2.8825	9.6025	50.31	2.035	3.365	7.2075	0.267775	15.9725	1.16935	98.6146	4					pinching out, 2 cm, sharp contact
	standard deviation	0.279091	0.0377492	0.523665	1.70008	0.0479583	0.220983	0.722697	0.0768453	0.710276	0.134527	0.517194
M178-29 382 cm	average	5.883	3.569	7.84	54.875	1.7805	2.58325	4.833	0.18871	16.397	0.72121	97.9495	10	12	134	1	8.2	coarse, ~2 cm, sharp contact
	standard deviation	0.469019	0.663232	2.06577	4.75165	0.34185	0.831936	1.60042	0.0767816	1.05782	0.288846	1.0382
M178-29 394.5 cm	average	5.19	2.77	11.22	48.91	2.46	3.46	7.84	0.3216	15.36	0.8461	98.3777	1					coarse, 1 cm, sharp contact
	standard deviation
M178-29 397 cm	average	5.7075	3.2575	7.5675	56.135	0.596375	2.5375	5.24	0.189425	16.37	1.60157	99.2024	4					coarse, 1 cm, sharp contact
	standard deviation	0.269738	0.802761	2.30198	2.99873	0.287967	0.6034	1.44123	0.0607199	0.636763	0.571063	1.50935
M178-29 402.5 cm	average	6.155	3.685	7.41	56.74	0.6394	2.13365	4.225	0.2048	16.07	1.60155	98.8644	2					coarse, 2 cm, sharp contact
	standard deviation	0.162635	0.72832	3.45068	3.33754	0.386929	0.673661	0.912168	0.0517602	0.707107	0.506925	2.82843
M178-29 406 cm	average	3.33325	1.635	9.23	49.68	1.59575	8.875	14.465	0.1205	10.3	0.5291	99.7636	2					medium, 1.5 cm, sharp contact
	standard deviation	4.01177	2.31224	1.14551	1.41421	0.684833	8.29436	10.3167	0.0268701	9.77222	0.65068	1.47488
M178-29 413.5 cm	average												0					fine, 0.5 cm, sharp contact
	standard deviation
M178-29 424 cm	average	5.39667	3.22667	9.82889	51.1144	0.807578	3.44333	7.16889	0.186433	16.4478	2.08778	99.7085	9					fine, 1 cm, erosional contact
	standard deviation	0.728766	0.830903	1.47082	1.47359	0.151365	0.536866	1.33354	0.0553154	0.874682	0.255136	0.751845
M178-29 435 cm	average	5.965	3.75	7.585	55.19	0.7034	2.35325	4.67	0.2073	17.42	1.44885	99.2928	4					medium, 1 cm, erosive contact
	standard deviation	1.43543	1.13137	1.08187	2.96985	0.319047	1.01364	2.54558	0.0202233	0.212132	0.510743	0.166594
M178-29 437 cm	average	5.66	3.4375	5.97	57.9475	1.39277	1.85597	4.15	0.15085	16.28	0.520325	97.3649	4					medium, 1.5 cm, sharp contact
	standard deviation	0.282017	0.317739	1.29576	3.28401	0.255793	0.500196	1.18507	0.0580548	0.873079	0.197132	0.697219
M178-29 439.5 cm	average	5.54	1.8236	4.4196	54.1767	0.828	1.8716	7.6	0.0882	23.5633	0.340133	100.251	3					coarse, 1 cm, sharp contact
	standard deviation	0.268514	1.32021	3.25355	0.528425	0.70311	1.61347	2.76282	0.111117	4.22134	0.283545	0.335303
M178-29 443 cm	average	5.515	2.43	9.665	49.31	1.965	3.175	7.325	0.1582	16.475	0.85405	96.8722	2					medium, 1.5 cm, sharp contact
	standard deviation	0.912168	0.820244	0.162635	2.89914	0.162635	0.572756	1.53442	0.150897	0.459619	0.2477	2.13808
M178-29 446 cm	average	5.605	3.345	7.105	56.145	1.72945	2.41	5.045	0.17665	16.18	0.62095	98.3621	2					fine, 1 cm, sharp contact
	standard deviation	0.190919	0.657609	2.14253	6.37103	0.439184	1.04652	2.38295	0.057912	0.381838	0.312188	0.0745998
M178-29 454 cm	average	5.97667	3.08333	8.18333	53.51	1.97543	2.33333	5.83667	0.265467	16.3933	0.797567	98.3551	3					medium, 1 cm, sharp contact
	standard deviation	0.453468	1.34783	1.59813	2.51513	0.331598	1.06237	1.75378	0.0819203	1.34823	0.0842483	0.711732
M178-29 460 cm	average	5.395	3.6475	9.93	49.8575	2.08688	3.29	6.72	0.251925	15.4975	0.9648	97.6411	4					coarse, 1 cm, sharp contact
	standard deviation	0.818881	0.909446	0.416493	0.811064	0.338904	0.330857	1.30833	0.039874	0.725597	0.11661	1.8947
M178-35 15 cm	average	5.68857	3.03143	10.6614	50.2364	2.19286	3.43071	7.61	0.217571	15.7829	0.92285	98.8519	14	70	149	40	27	Lense, ~2 cm, sharp contact		MB4	344
	standard deviation	0.467281	0.400689	0.75787	0.818137	0.0886157	0.239598	0.596412	0.0622998	0.401678	0.0734387	0.947781
M178-35 70 cm	average	1.49046	13.6254	2.04617	62.295	0.18353	0.82913	0.10925	0.02552	19.042	0.0401	99.6465	10					black lenses, 2 mm
	standard deviation	3.39243	5.24131	6.15044	9.24063	0.575008	2.60042	0.266098	0.0466321	1.04973	0.0640276	1.17574
M178-35 324 cm	average	3.9275	2.19	9.1	50.485	1.89677	4.4475	10.075	0.14595	15.7375	0.549075	98.0052	15	20	140	4	12.2	1 cm, erosive, strongly blurred at bottom; few glass shards
	standard deviation	0.96676	0.55106	1.48326	2.12831	0.343924	2.66744	3.18976	0.0428387	2.97104	0.231054	1.8104
M178-35 414 cm	average	5.3681	2.80905	9.85238	51.2657	2.02584	3.48429	7.09714	0.206295	16.0781	0.924724	98.1869	21	22	156	12	11.6	coarse crystals, normal graded, dark, 6 cm, bottom: erosive		MB2	8457
	standard deviation	0.329767	0.473972	1.01768	1.16345	0.242098	0.478315	0.598307	0.0606564	0.832644	0.126796	1.12385
M178-35 456 cm	average	6.11182	3.23182	9.27909	52.17	1.99545	2.97364	6.50364	0.242345	16.2009	1.01983	98.7087	15	77	182	44	25.4	silty to fine sand, 2 mm, sharp contact; higher amount of glass shards
	standard deviation	0.522108	0.746188	0.493791	0.906929	0.169786	0.309363	0.701331	0.0646065	0.576063	0.100697	0.631548
M178-35 464 cm	average	6.32143	3.38714	6.36286	55.7029	1.43341	1.91183	4.8	0.179471	17.7643	0.576857	97.8633	15	42	199	31	15.4	silty, 5 mm, bottom: erosive
	standard deviation	0.735401	0.454522	0.631287	1.26099	0.347818	0.378803	0.810062	0.0384303	0.918275	0.160015	1.17107
M178-35 474 cm	average	6.89667	4.02	5.75833	57.0733	1.5802	1.54803	4.02667	0.20365	17.1367	0.806817	98.2435	15	80	262	22	22	clayey, small layer, faults; strongly altered
	standard deviation	0.259974	0.262374	0.47864	0.612917	0.0990934	0.198699	0.383493	0.0625768	0.469752	0.384756	0.920992
M178-35 498 cm	average	5.61937	2.80812	9.96563	50.6756	2.05625	3.45063	7.21437	0.231056	15.9069	1.04906	97.9279	20	33	160	24	15.2	1 cm
	standard deviation	0.440477	0.300582	0.80544	1.33044	0.104873	0.515835	0.595505	0.0538516	0.482794	0.0949044	1.30933
M178-35 505 cm	average	5.57441	2.70382	10.2803	51.045	2.10059	3.54559	7.12853	0.230874	15.6859	1.0694	98.295	34	137	56	17	65.2	silty, 5 mm, bottom: erosive; many glass shards			9340
	standard deviation	0.528343	0.261175	0.602623	0.766243	0.0989319	0.635525	0.404603	0.0464208	0.393647	0.0902489	0.852498
M178-35 523 cm	average	5.46474	2.80316	10.0716	51.2547	2.00579	3.61211	7.30474	0.206584	15.6821	0.974405	98.4055	19	64	133	31	28.1	1 cm, fault, erosive contact
	standard deviation	0.42381	0.364266	0.627218	0.88759	0.10772	0.698057	0.523475	0.0415007	0.693106	0.10931	0.918467
M178-35 529 cm	average	5.571	2.738	9.018	51.314	1.82378	3.764	7.221	0.24958	15.872	0.88985	97.5714	8	26	156	24	12.6	many faults, many minerals
	standard deviation	0.85373	0.389438	1.61671	2.04454	0.179109	1.62072	1.87488	0.0515339	1.48728	0.183939	0.984054
M178-35 531 cm	average	4.08246	1.98679	9.01925	50.6284	1.67458	6.74194	10.9268	0.180721	13.9321	0.738826	99.1731	10	66	90	19	37.7	many faults, erosive contact			9592
	standard deviation	2.15251	1.28478	2.85065	2.67111	0.598241	7.10405	5.57983	0.0727041	6.41279	0.475757	1.52895
M178-35 538 cm	average	5.06083	2.90417	10.8125	50.1058	2.07333	3.815	8.08667	0.201992	15.5308	0.922217	98.5912	12	63	130	5	31.8	4 mm, pinching out, erosional contact		MB1	9660
	standard deviation	0.480822	0.615267	0.830237	0.95753	0.0798104	0.286499	0.683698	0.0537444	0.453721	0.122023	0.920984
M178-35 546 cm	average	5.00923	2.45769	10.8462	49.7892	2.06462	4.32	8.91615	0.212315	15.1369	0.888908	98.7523	13	62	60	5	48.8	coarse at bottom, 5 mm, sharp contact		MB1	9738
	standard deviation	0.678791	0.397873	0.777234	1.32496	0.062798	0.933515	1.44804	0.0530773	1.07581	0.114038	0.613718
M178-35 549 cm	average	5.67769	2.94615	9.37462	52.3508	2.10231	3.22538	6.61692	0.219015	16.0638	0.984608	98.5767	13	31	158	8	15.7	coarse to fine lapilli, 5 mm, erosional contact			9767
	standard deviation	0.550366	0.393055	0.610882	0.921271	0.0877643	0.310232	0.65552	0.0528756	0.308991	0.104514	0.822036
M178-35 551 cm	average	5.635	3.3775	8.98667	52.05	1.80488	3.11917	6.43833	0.203008	16.2133	0.9191	97.8279	12	21	138	14	12.1	fine, 2 mm
	standard deviation	0.974675	0.639945	0.471831	1.09385	0.502271	0.305717	0.683691	0.0490839	0.466775	0.244548	1.15679
M178-35 553.5 cm	average	5.98583	3.39667	8.9625	53.3792	2.06417	2.84667	5.53833	0.2183	16.16	0.951642	98.5516	15	35	151	51	14.8	fine, 1 mm, erosional contact; many clasts and organic material
	standard deviation	0.350959	0.438123	0.642794	1.23849	0.131388	0.221906	0.673442	0.0685229	0.413851	0.138526	1.00249
M178-35 555 cm	average	6.09267	3.194	8.62933	52.564	1.96867	2.81667	5.85	0.214293	16.1153	1.00279	97.445	15	66	179	24	24.5	1 mm; many minerals and fragments, not so much organic material			9.825
	standard deviation	0.368558	0.280479	0.376155	2.11293	0.0789997	0.130639	0.339538	0.0538523	0.736487	0.0713802	3.6504
M178-35 560 cm	average	6.66333	4.14333	7.26333	55.6283	1.81955	2.16667	4.15795	0.224567	16.7433	0.9517	98.8104	11					2 mm
	standard deviation	0.640427	0.746851	1.31977	1.19802	0.158479	0.63582	1.57811	0.0423405	0.524544	0.521276	1.0015
M178-35 563 cm	average	5.69125	3.10938	9.28688	52.5113	2.00378	3.3775	6.39813	0.241831	15.9975	0.990875	98.6175	20	27	132	8	16.2	1 mm
	standard deviation	0.395658	0.503792	0.376222	0.656718	0.182788	0.730694	0.73395	0.0458877	0.340304	0.0928419	0.558144
M178-35 568.5 cm	average	2.31854	2.86764	0.89663	82.7	0.0994	0.11947	1.16309	0.02601	9.04637	0.06182	99.2371	10					coarse, 5 mm
	standard deviation	3.33362	5.12537	1.09014	19.0564	0.19144	0.216369	3.01967	0.0364125	10.0769	0.0900602	1.34636
M178-35 572 cm	average	6.05	4.455	7.84583	54.8	1.79957	2.23912	4.86083	0.222333	16.4467	0.77065	98.7194	15	29	210	22	11.1	fine to medium, 4 mm
	standard deviation	1.01484	0.698524	0.776255	1.42283	0.358777	0.562059	1.15473	0.0556525	0.442972	0.186245	0.865438
M178-35 574 cm	average												0	0	140	12	0	fine, 2 mm; no glass shards
	standard deviation
M178-35 579 cm	average	5.522	2.726	9.483	51.558	2.00782	3.497	7.11	0.2032	16.362	0.91179	98.469	14	17	124	8	11.4	coarse, 2 cm pinching out; strong altered/recrystallized,		M1
	standard deviation	0.588195	0.473925	0.762438	0.772827	0.219001	0.429135	0.884383	0.0371349	0.583853	0.0719344	0.78674
M178-35 604 cm	average	5.85875	3.49	7.06375	57.5887	1.59278	2.11952	4.85	0.1637	16.4975	0.651275	99.2248	11					lense, 5 mm
	standard deviation	0.741705	0.507064	2.90837	5.15493	0.510542	1.12455	1.82003	0.0765093	0.886176	0.338401	0.654429
M178-35 675 cm	average	6.15143	3.90643	6.33	57.48	1.30934	2.05551	4.29857	0.202443	17.165	0.505164	98.8987	21	24	126	16	14.5	ash lense, coarse, small lapilli, 1 cm
	standard deviation	1.19184	1.02211	1.55954	2.68838	0.490204	0.514689	1.00402	0.0617732	1.0473	0.202108	1.37857

## Sheet: Supplementary Table C
Supplementary Table C: Single glass shard geochemical composition of the primary marine tephras measured by electron microprobe as well as the respective correlated tephra
Sample	Na2O	K2O	FeOt	SiO2	TiO2	MgO	CaO	MnO	Al2O3	P2O5	Total	Correlated Tephra	Na2O	K2O	FeOt	SiO2	TiO2	MgO	CaO	MnO	Al2O3	P2O5	Total
	[wt%]	[wt%]	[wt%]	[wt%]	[wt%]	[wt%]	[wt%]	[wt%]	[wt%]	[wt%]	[wt%]		[wt%]	[wt%]	[wt%]	[wt%]	[wt%]	[wt%]	[wt%]	[wt%]	[wt%]	[wt%]	[wt%]
M178-10 273 cm	5.5	2.7	10.85	49.58	2.01	3.9	8.24	0.1865	16.61	0.8995	99.5765	MB3	5.52339	2.71148	10.8961	49.7909	2.01855	3.91659	8.27504	0.187293	16.6806	0.903326	100
	5.23	2.65	11.01	49.73	1.99	4.08	8.32	0.1732	16.64	0.8936	99.8232		5.23926	2.65469	11.0295	49.8181	1.99352	4.08723	8.33474	0.173507	16.6695	0.895183	100
	5.24	2.6	10.2	49.63	2.03	4.18	8.32	0.1471	16.51	0.9188	98.8571		5.30058	2.63006	10.3179	50.2038	2.05347	4.22833	8.41619	0.148801	16.7009	0.929422	100
	4.92	2.61	10.34	49.67	1.97	4.03	8.22	0.0976	16.44	0.9282	98.2976		5.00521	2.6552	10.5191	50.5302	2.00412	4.09979	8.36236	0.0992903	16.7247	0.944275	100
	5.33	2.72	9.29	50.65	2.02	3.82	7.98	0.1585	16.99	0.9162	98.9585		5.3861	2.74863	9.38777	51.1831	2.04126	3.8602	8.06399	0.160168	17.1688	0.925843	100
	5.35	2.59	10.03	50.14	2.04	4.01	8.41	0.226	16.67	0.9675	99.466		5.37872	2.6039	10.0838	50.4092	2.05095	4.03153	8.45515	0.227213	16.7595	0.972694	100
	4.95	2.6	9.84	49.9	2.02	4.09	8.41	0.1995	16.81	0.9197	98.8195		5.00913	2.63106	9.95755	50.4961	2.04413	4.13886	8.51047	0.201883	17.0108	0.930687	100
	4.91	2.7	9.76	50.21	1.99	4.09	8.23	0.1777	16.56	0.9468	98.6277		4.97832	2.73757	9.8958	50.9086	2.01769	4.14691	8.34451	0.180173	16.7904	0.959974	100
	4.84	2.65	10.03	50.1	2	3.92	8.33	0.2017	16.58	0.9656	98.6517		4.90615	2.68622	10.1671	50.7847	2.02733	3.97358	8.44385	0.204457	16.8066	0.978797	100
	4.77	2.55	9.87	49.73	1.97	4.09	8.46	0.243	16.81	0.9796	98.493		4.84298	2.58902	10.021	50.4909	2.00014	4.15258	8.58944	0.246718	17.0672	0.994588	100
M178-10 305 cm	2.88	1.48	10.72	48.27	1.3335	6.42	12.32	0.1577	14.74	0.3377	98.3212	FS	2.92917	1.50527	10.903	49.0942	1.35627	6.52962	12.5304	0.160393	14.9917	0.343466	100
	2.89	1.44	11.46	48.16	1.3969	6.46	12.48	0.3651	14.88	0.4091	99.532		2.90359	1.44677	11.5139	48.3864	1.40347	6.49037	12.5387	0.366817	14.95	0.411024	100
	2.81	1.45	10.75	48.4	1.3452	6.28	12.43	0.201	14.88	0.29	98.5462		2.85145	1.47139	10.9086	49.114	1.36505	6.37265	12.6134	0.203965	15.0995	0.294278	100
	2.88	1.41	10.52	47.75	1.3965	6.31	12.43	0.2338	14.81	0.4142	97.7403		2.94658	1.4426	10.7632	48.854	1.42879	6.45588	12.7174	0.239205	15.1524	0.423776	100
	2.89	1.42	11.17	48.79	1.5124	6.21	12.07	0.1714	15.12	0.3169	99.3538		2.9088	1.42924	11.2427	49.1073	1.52224	6.25039	12.1485	0.172515	15.2183	0.318961	100
	2.55	1.34	10.56	48.65	1.3743	6.3	12.62	0.1568	15.08	0.39	98.6311		2.58539	1.3586	10.7066	49.3252	1.39337	6.38744	12.7952	0.158976	15.2893	0.395413	100
	2.8	1.37	11.16	48.42	1.3909	6.43	12.51	0.2518	14.72	0.3693	99.0527		2.82678	1.3831	11.2667	48.8831	1.4042	6.49149	12.6296	0.254208	14.8608	0.372832	100
	2.51	1.38	10.74	48.53	1.5066	6.71	12.44	0.1745	13.95	0.3958	97.9411		2.56276	1.40901	10.9658	49.5502	1.53827	6.85106	12.7015	0.178168	14.2433	0.40412	100
	2.87	1.39	11.55	49.1	1.4164	6.36	12.34	0.2955	15.18	0.3819	100.502		2.85567	1.38306	11.4923	48.8548	1.40933	6.32824	12.2784	0.294024	15.1042	0.379993	100
	2.58	1.39	10.49	48.65	1.3461	6.36	12.7	0.2178	15.21	0.3246	98.9439		2.60754	1.40484	10.602	49.1693	1.36047	6.42788	12.8356	0.220125	15.3723	0.328065	100
M178-10 364 cm	5.7	2.75	9.52	50.65	1.84	3.41	7.26	0.146	16.9	0.9667	99.1427	MB1	5.74929	2.77378	9.60232	51.088	1.85591	3.43949	7.32278	0.147262	17.0461	0.975059	100
	5.61	3.75	9.54	52.03	1.77	2.83	6.17	0.278	17.43	0.8722	100.28		5.59432	3.73952	9.51334	51.8846	1.76505	2.82209	6.15276	0.277223	17.3813	0.869763	100
	4.84	2.41	11.23	50.52	2.28	3.99	8.1	0.2202	15.75	0.8099	100.15		4.83275	2.40639	11.2132	50.4443	2.27658	3.98402	8.08786	0.21987	15.7264	0.808686	100
	4.81	2.18	10.73	50.81	2.18	3.87	8.55	0.2235	16.18	0.7879	100.321		4.79459	2.17302	10.6956	50.6472	2.17302	3.8576	8.52261	0.222784	16.1282	0.785376	100
	5.77	2.83	9.95	50.43	2.01	3.58	7.39	0.283	16.64	0.8457	99.7287		5.7857	2.8377	9.97707	50.5672	2.01547	3.58974	7.4101	0.28377	16.6853	0.848001	100
	5.56	3.34	10.29	51.3	1.95	3.8	7.57	0.3318	15.05	1.0689	100.261		5.54554	3.33132	10.2632	51.1666	1.94493	3.79012	7.55032	0.330937	15.0109	1.06612	100
	2.97	3.39	10.51	50.31	2.25	3.93	8.08	0.2098	16.76	0.7435	99.1533		2.99536	3.41895	10.5997	50.7396	2.26921	3.96356	8.149	0.211592	16.9031	0.749849	100
	5.27	2.58	11.03	49.12	2.28	3.55	7.71	0.2311	15.62	1.0111	98.4022		5.35557	2.62189	11.2091	49.9176	2.31702	3.60764	7.83519	0.234852	15.8736	1.02752	100
	4.84	2.54	11.57	50.98	2.28	3.52	7.9	0.087	16.05	0.8973	100.664		4.80806	2.52324	11.4936	50.6436	2.26495	3.49677	7.84787	0.0864259	15.9441	0.891379	100
	4.71	2.27	11.25	49.5	2.29	3.96	8.31	0.1383	15.39	0.8535	98.6718		4.7734	2.30056	11.4014	50.1663	2.32083	4.0133	8.42186	0.140162	15.5972	0.864989	100
M178-11 244 cm	4.99	2.64	10.39	49.86	1.99	4.13	8.25	0.1855	16.56	0.8472	98.9955	MB3	5.04063	2.66679	10.4954	50.3659	2.01019	4.17191	8.33371	0.187382	16.728	0.855796	100
	4.96	2.65	9.91	49.83	1.95	3.89	8.23	0.2408	17	0.8775	98.6608		5.02733	2.68597	10.0445	50.5064	1.97647	3.9428	8.34171	0.244069	17.2308	0.889411	100
	4.75	2.7	9.83	51.2	2.02	3.96	8.38	0.2029	17.1	0.8974	100.143		4.74322	2.69615	9.81597	51.1269	2.01712	3.95435	8.36804	0.20261	17.0756	0.896119	100
	5.03	2.6	10.45	50.04	1.96	4.07	8.37	0.1524	16.2	0.9702	98.8724		5.08737	2.62965	10.5692	50.6107	1.98235	4.11642	8.46546	0.154138	16.3848	0.981265	100
	4.92	2.76	10.52	49.73	2.07	3.84	8.22	0.2118	16.13	0.9576	98.4018		4.99991	2.80483	10.6909	50.5377	2.10362	3.90237	8.35351	0.21524	16.392	0.973153	100
	4.99	1.92	9.86	51.27	2.05	4.12	5.86	0.1868	17.03	0.9519	97.2868		5.12916	1.97355	10.135	52.6999	2.10717	4.2349	6.02343	0.19201	17.5049	0.978447	100
	5.06	2.66	9.29	50.3	1.95	3.86	8.37	0.2343	16.51	0.9535	98.2343		5.15095	2.70781	9.45698	51.2041	1.98505	3.92938	8.52045	0.238511	16.8068	0.970639	100
	5.05	2.85	10.28	50.17	2.11	3.91	7.99	0.1543	15.9	0.9683	98.4143		5.13137	2.89592	10.4456	50.9784	2.144	3.973	8.11874	0.156786	16.1562	0.983902	100
	4.97	2.66	9.87	50.22	2.07	4.04	8.29	0.175	16.87	0.9277	99.165		5.01185	2.6824	9.95311	50.6429	2.08743	4.07402	8.3598	0.176474	17.0121	0.935512	100
	4.77	2.74	10.21	50.05	2.05	4.11	8.08	0.2394	16.38	0.9347	98.6294		4.83629	2.77808	10.3519	50.7455	2.07849	4.16711	8.19228	0.242727	16.6076	0.947689	100
	5.43	2.73	9.8	50.18	2.09	3.88	8.18	0.1868	16.47	0.971	98.9468		5.4878	2.75906	9.90431	50.7141	2.11225	3.9213	8.26707	0.188788	16.6453	0.981335	100
	4.81	2.53	10.18	50.09	1.99	4.22	8.41	0.137	16.64	0.9141	99.007		4.85824	2.55537	10.2821	50.5924	2.00996	4.26232	8.49435	0.138374	16.8069	0.923268	100
	4.77	2.67	9.51	50.09	2.01	3.98	8.35	0.1779	16.51	0.9491	98.0679		4.86398	2.7226	9.69736	51.0769	2.0496	4.05841	8.51451	0.181405	16.8353	0.967799	100
	5.45	3.42	9.29	51.94	1.99	3.03	6.6	0.25	16.58	0.9888	98.55		5.53019	3.47032	9.42669	52.7042	2.01928	3.07458	6.69711	0.253678	16.8239	1.00335	100
	5.19	2.7	10.24	50.39	2.04	4	8.2	0.1525	16.7	0.8462	99.6125		5.21019	2.7105	10.2798	50.586	2.04794	4.01556	8.2319	0.153093	16.765	0.849492	100
	5.04	2.7	9.95	49.5	2.01	3.97	8.25	0.2092	16.65	1.0038	98.2792		5.12825	2.74728	10.1242	50.3667	2.04519	4.03951	8.39445	0.212863	16.9415	1.02138	100
	5.77	3.38	10.69	49.48	2.13	3.44	7.38	0.2449	15.92	1.2134	98.4349		5.86174	3.43374	10.86	50.2667	2.16387	3.4947	7.49734	0.248794	16.1731	1.23269	100
	5.05	2.82	9.69	50.41	1.97	3.81	8	0.1945	16.99	0.9434	98.9345		5.10439	2.85037	9.79436	50.9529	1.99122	3.85103	8.08616	0.196595	17.173	0.95356	100
	4.75	2.5	10.79	49.27	2.18	4.15	8.8	0.1941	15.9	0.8922	98.5341		4.82067	2.53719	10.9505	50.003	2.21243	4.21174	8.93092	0.196988	16.1365	0.905473	100
M178-11 275 cm	2.77	1.45	10.68	48.75	1.3782	6.36	12.46	0.1811	14.94	0.2896	98.9693	FS	2.79885	1.4651	10.7912	49.2577	1.39255	6.42624	12.5898	0.182986	15.0956	0.292616	100
	2.71	1.46	10.75	47.84	1.4039	6.44	12.4	0.1976	14.65	0.3542	97.8515		2.7695	1.49206	10.986	48.8904	1.43473	6.5814	12.6723	0.201939	14.9717	0.361977	100
	2.99	1.61	12.33	48.05	1.5779	6.01	11.54	0.2639	14.39	0.4078	98.7618		3.02749	1.63018	12.4846	48.6524	1.59768	6.08535	11.6847	0.267209	14.5704	0.412913	100
	3.19	1.38	11.76	48.8	1.4331	6.21	12.16	0.1508	14.85	0.25	99.9339		3.19211	1.38091	11.7678	48.8323	1.43405	6.21411	12.168	0.1509	14.8598	0.250165	100
	2.75	1.38	11.04	48.72	1.3672	6.36	12.25	0.2674	15.17	0.3293	99.3046		2.76926	1.38966	11.1173	49.0612	1.37677	6.40454	12.3358	0.269273	15.2762	0.331606	100
	2.82	1.45	10.93	48.56	1.3817	6.46	12.35	0.304	14.93	0.293	99.1857		2.84315	1.4619	11.0197	48.9587	1.39304	6.51304	12.4514	0.306496	15.0526	0.295405	100
	2.81	1.38	10.81	48.56	1.4132	6.43	12.52	0.1912	15.07	0.3704	99.1844		2.83311	1.39135	10.8989	48.9593	1.42482	6.48287	12.623	0.192772	15.1939	0.373446	100
	2.77	1.41	10.89	49.25	1.2971	6.52	12.79	0.2063	14.92	0.3986	100.053		2.76852	1.40925	10.8842	49.2237	1.29641	6.51652	12.7832	0.20619	14.912	0.398387	100
	2.83	1.36	11.2	47.85	1.4952	6.47	12.24	0.2369	14.54	0.4191	98.2221		2.88123	1.38462	11.4027	48.7161	1.52226	6.58711	12.4616	0.241188	14.8032	0.426686	100
	2.95	1.36	11.42	48.5	1.378	6.3	12.32	0.1908	14.96	0.3894	99.3788		2.96844	1.3685	11.4914	48.8032	1.38661	6.33938	12.397	0.191993	15.0535	0.391834	100
M178-12 209.5 cm	5.18	2.5	10.66	49.8	2.06	4.05	8.18	0.2016	16.3	0.9486	99.8802	TV	5.18621	2.503	10.6728	49.8597	2.06247	4.05486	8.18981	0.201842	16.3196	0.949738	100
	4.95	2.62	9.63	49.92	1.95	3.87	8.12	0.2524	16.48	0.9341	98.7265		5.01385	2.6538	9.75422	50.5639	1.97515	3.91992	8.22474	0.255656	16.6926	0.946149	100
	5.52	2.46	9.57	51.14	1.83	3.46	7.05	0.192	16.46	0.9155	98.5975		5.59852	2.49499	9.70613	51.8674	1.85603	3.50922	7.15028	0.194731	16.6941	0.928523	100
	4.49	2.58	10.28	49.4	2.08	4.13	8.1	0.2331	16.05	0.996	98.3391		4.56583	2.62357	10.4536	50.2343	2.11513	4.19975	8.23681	0.237037	16.3211	1.01282	100
	5.19	2.54	9.91	51.65	1.95	2.88	6.98	0.2223	16.29	0.7611	98.3734		5.27582	2.582	10.0739	52.504	1.98224	2.92762	7.09541	0.225976	16.5594	0.773685	100
	5.22	2.61	9.18	48.2	2.35	3.06	7.02	0.2627	15.19	0.9192	94.0119		5.55249	2.77624	9.76472	51.2701	2.49968	3.25491	7.46714	0.279433	16.1575	0.977749	100
	5.27	2.71	10.57	50.05	2.06	3.59	7.73	0.1556	15.5	0.9335	98.5691		5.3465	2.74934	10.7234	50.7766	2.0899	3.64212	7.84221	0.157859	15.725	0.947051	100
	4.14	1.77	11.37	49.34	2.11	3.57	9.47	0.1883	16.66	0.6047	99.223		4.17242	1.78386	11.459	49.7264	2.12652	3.59796	9.54416	0.189775	16.7905	0.609435	100
	5.6	2.51	10.17	50.36	2.12	3.57	7.83	0.2514	15.65	0.9042	98.9656		5.65853	2.53623	10.2763	50.8864	2.14216	3.60731	7.91184	0.254028	15.8136	0.913651	100
	4.9	2.72	11.01	50.46	2.58	2.87	6.28	0.1792	14.8	0.9372	96.7364		5.06531	2.81176	11.3814	52.1624	2.66704	2.96683	6.49187	0.185246	15.2993	0.968818	100
	5.86	2.6	9.52	50.56	1.79	3.54	6.97	0.1793	16.48	0.9021	98.4015		5.95519	2.64224	9.67465	51.3813	1.81908	3.59751	7.08323	0.182213	16.7477	0.916754	100
	5.23	2.61	9.79	49.46	1.95	3.99	8.06	0.194	16.04	0.9716	98.2956		5.32069	2.65526	9.95975	50.3176	1.98381	4.05918	8.19976	0.197364	16.3181	0.988447	100
	4.85	2.58	9.78	50.26	1.98	3.75	7.91	0.182	16.79	0.908	98.9901		4.89948	2.60632	9.87978	50.7728	2.0002	3.78826	7.9907	0.183857	16.9613	0.917263	100
	5.41	2.73	9.09	49.98	1.95	3.73	7.77	0.1571	16.67	0.8981	98.3852		5.49879	2.77481	9.23919	50.8003	1.98201	3.79122	7.89753	0.159678	16.9436	0.912841	100
M178-14 66 cm	6.4	4.53	9.9	50.72	2.07	3.29	5.76	0.1173	15.63	0.8933	99.3106	FV	6.44443	4.56145	9.96872	51.0721	2.08437	3.31284	5.79999	0.118114	15.7385	0.899501	100
	5.47	2.71	10.45	50.67	2	3.35	6.89	0.2384	15.19	1.0486	98.017		5.58066	2.76483	10.6614	51.6951	2.04046	3.41777	7.02939	0.243223	15.4973	1.06981	100
	5.34	2.82	10.12	51.24	2.06	3.37	6.87	0.2435	15.13	0.9559	98.1494		5.44069	2.87317	10.3108	52.2061	2.09884	3.43354	6.99953	0.248091	15.4153	0.973923	100
	5.83	2.82	9.41	51.09	1.92	3.17	6.76	0.2155	15.31	1.0592	97.5847		5.9743	2.8898	9.64291	52.3545	1.96752	3.24846	6.92732	0.220834	15.6889	1.08542	100
	5.37	2.02	8.93	50.54	1.6633	2.67	8.28	0.1759	17.82	0.6534	98.1226		5.47275	2.05865	9.10086	51.507	1.69512	2.72109	8.43842	0.179266	18.161	0.665902	100
	5.35	2.08	9.74	51.55	1.8	3	8.05	0.1454	17.14	0.6703	99.5257		5.3755	2.08991	9.78642	51.7957	1.80858	3.0143	8.08836	0.146093	17.2217	0.673494	100
	5.88	2.57	10.04	50.71	1.92	3.55	7.32	0.2386	15.99	0.9124	99.131		5.93155	2.59253	10.128	51.1545	1.93683	3.58112	7.38417	0.240692	16.1302	0.920398	100
	6.18	3.56	10.49	52.32	1.96	2.45	5.28	0.315	16.2	0.9578	99.7128		6.1978	3.57025	10.5202	52.4707	1.96565	2.45706	5.29521	0.315907	16.2467	0.960559	100
	5.92	3.27	8.51	53.67	2.12	2.53	5.93	0.2101	15.97	1.0441	99.1742		5.96929	3.29723	8.58086	54.1169	2.13765	2.55107	5.97938	0.211849	16.103	1.05279	100
	5.01	2.57	11.2	49.99	2.07	3.44	8.28	0.1451	16.32	0.8518	99.8769		5.01617	2.57317	11.2138	50.0516	2.07255	3.44424	8.29021	0.145279	16.3401	0.85285	100
M178-14 181 cm	5.85	2.83	10.4	52.22	2.08	3.1	6.89	0.238	16.06	1.1252	100.793	FF	5.80396	2.80773	10.3182	51.8091	2.06363	3.0756	6.83578	0.236127	15.9336	1.11635	100
	5.58	2.87	11.18	50.27	2.14	3.86	7.77	0.23	15.22	0.9179	100.038		5.57789	2.86891	11.1758	50.251	2.13919	3.85854	7.76706	0.229913	15.2142	0.917552	100
	4.67	2.95	10.54	50.76	2.05	3.05	7.42	0.2149	16.38	0.8876	98.9225		4.72087	2.98213	10.6548	51.3129	2.07233	3.08322	7.50082	0.217241	16.5584	0.897268	100
	5.58	3	10.33	51.91	2.05	3.15	6.64	0.1798	15.48	1.0678	99.3876		5.61438	3.01849	10.3937	52.2299	2.06263	3.16941	6.68091	0.180908	15.5754	1.07438	100
	6.41	4.4	10.27	51.46	1.99	2.67	5.35	0.2569	16.47	0.8045	100.081		6.40479	4.39642	10.2616	51.4181	1.98838	2.66783	5.34565	0.256691	16.4566	0.803846	100
	5.51	3.04	9.6	51.44	2.03	3.61	7.3	0.2996	14.68	1.113	98.6226		5.58695	3.08246	9.73408	52.1584	2.05835	3.66042	7.40195	0.303784	14.885	1.12854	100
	4.92	2.88	10.35	51.73	2.05	2.96	7.38	0.2934	16.42	1.0112	99.9946		4.92027	2.88016	10.3506	51.7328	2.05011	2.96016	7.3804	0.293416	16.4209	1.01125	100
M178-14 320 cm	5.04	3.77	10	50.75	2.06	3.4	6.95	0.2037	15.98	1.1576	99.3113	TV	5.07495	3.79614	10.0693	51.1019	2.07429	3.42358	6.9982	0.205113	16.0908	1.16563	100
	5.69	3.17	8.09	51.86	1.79	2.87	5.93	0.1164	16.43	0.9174	96.8639		5.87422	3.27263	8.35192	53.539	1.84795	2.96292	6.12199	0.120169	16.9619	0.947102	100
	4.89	2.62	9.51	47.37	1.93	3.96	8.08	0.1784	16.48	0.7784	95.7969		5.10455	2.73495	9.92725	49.4484	2.01468	4.13375	8.43451	0.186227	17.2031	0.812552	100
	5.25	2.67	9.42	50.08	1.96	3.92	8.01	0.2187	16.07	0.9037	98.5024		5.32982	2.71059	9.56322	50.8414	1.9898	3.9796	8.13178	0.222025	16.3143	0.91744	100
	5.23	2.65	9.73	50.28	1.94	4.01	7.85	0.1711	16.53	0.8204	99.2115		5.27157	2.67106	9.80733	50.6796	1.95542	4.04187	7.91239	0.17246	16.6614	0.82692	100
	4.51	2.52	9.52	50.63	1.96	3.98	8.09	0.1899	15.98	0.8495	98.2295		4.59129	2.56542	9.69159	51.5426	1.99533	4.05174	8.23582	0.193323	16.268	0.864811	100
	4.94	2.52	9.52	50.68	1.96	3.9	8.04	0.2132	16.57	0.912	99.2553		4.97706	2.53891	9.59143	51.0602	1.97471	3.92926	8.10032	0.2148	16.6943	0.918843	100
	4.99	2.51	9.42	50.75	1.89	3.87	8.01	0.3071	16.44	0.8681	99.0553		5.03759	2.53394	9.50984	51.234	1.90803	3.90691	8.08639	0.310029	16.5968	0.876379	100
	4.92	2.68	9.09	50.94	1.91	3.76	7.85	0.1868	16.69	0.9447	98.9716		4.97112	2.70785	9.18445	51.4693	1.92985	3.79907	7.93157	0.188741	16.8634	0.954516	100
	5.04	2.58	9.55	50.27	2	3.95	7.84	0.1223	16.56	0.8579	98.7702		5.10275	2.61212	9.66891	50.8959	2.0249	3.99918	7.93762	0.123823	16.7662	0.868582	100
	5.48	2.57	9.6	50.5	1.92	3.92	8.08	0.2641	16.4	0.8454	99.5796		5.50314	2.58085	9.64053	50.7132	1.92811	3.93655	8.11411	0.265215	16.4692	0.848969	100
	5.26	2.59	9.51	50.47	1.97	3.77	8.04	0.2378	16.3	0.8004	98.9482		5.31591	2.61753	9.61109	51.0065	1.99094	3.81007	8.12546	0.240328	16.4733	0.808908	100
	5.03	2.75	9.31	50.39	1.89	3.76	7.92	0.1716	16.04	0.8737	98.1354		5.12557	2.80225	9.48689	51.3474	1.92591	3.83144	8.07048	0.17486	16.3448	0.890301	100
	5.4	2.65	9.53	50.72	1.97	3.86	8	0.2654	16.44	0.8655	99.701		5.41619	2.65795	9.55858	50.8721	1.97591	3.87158	8.02399	0.266196	16.4893	0.868096	100
	5.29	2.61	9.83	50.41	1.93	3.92	7.98	0.1872	16.32	0.8603	99.3376		5.32527	2.6274	9.89555	50.7461	1.94287	3.94614	8.03321	0.188448	16.4288	0.866037	100
	5.23	2.59	9.48	50.32	1.95	4.01	7.93	0.2239	16.01	0.9274	98.6713		5.30043	2.62488	9.60766	50.9976	1.97626	4.064	8.03678	0.226915	16.2256	0.939888	100
	5.05	2.63	9.12	50.8	1.86	3.78	7.91	0.0718	16.24	0.8357	98.2975		5.13747	2.67555	9.27796	51.6798	1.89221	3.84547	8.047	0.0730436	16.5213	0.850174	100
	5.27	2.61	9.29	50.72	1.89	3.91	7.93	0.1208	16.18	0.8382	98.7591		5.33622	2.64279	9.40673	51.3573	1.91375	3.95913	8.02964	0.122318	16.3833	0.848732	100
	4.91	3.01	10.33	48.66	1.98	3.58	7.7	0.2307	15.78	0.8958	97.0766		5.05786	3.10064	10.6411	50.1254	2.03963	3.68781	7.93188	0.237647	16.2552	0.922776	100
M178-14 463 cm	5.22	3.59	10.68	51.65	2.21	3.39	6.93	0.2029	15.42	0.9953	99.2929		5.25717	3.61557	10.7561	52.0178	2.22574	3.41414	6.97935	0.204345	15.5298	1.00239	100
	6.4	4.47	9.31	50.77	2.02	3.11	5.93	0.2303	16.63	1.0144	98.8703		6.47313	4.52107	9.41638	51.3501	2.04308	3.14554	5.99776	0.232931	16.82	1.02599	100
	5.82	3.22	10.17	51.1	1.97	2.88	6.36	0.2238	16.37	1.038	98.1138		5.93189	3.2819	10.3655	52.0824	2.00787	2.93537	6.48227	0.228102	16.6847	1.05796	100
	6.73	5.27	9.2	51.81	2.09	3.13	4.55	0.261	15.91	1.1275	98.951		6.80135	5.32587	9.29753	52.3592	2.11216	3.16318	4.59824	0.263767	16.0787	1.13945	100
	6.39	3.73	9.74	49.89	2.09	2.61	5.24	0.2064	15.48	1.048	95.3764		6.69977	3.91082	10.2122	52.3085	2.19132	2.73653	5.49402	0.216406	16.2304	1.0988	100
	5.82	3.94	10.88	50.21	2.27	3.56	6.56	0.2534	15.54	0.9205	99.0334		5.87681	3.97846	10.9862	50.7001	2.29216	3.59475	6.62403	0.255873	15.6917	0.929484	100
	6.24	3.59	10.32	51.31	2.3	3.1	6.28	0.2131	15.35	0.9978	98.7031		6.32199	3.63717	10.4556	51.9842	2.33022	3.14073	6.36252	0.2159	15.5517	1.01091	100
	5.02	2.64	10.71	52.58	2.28	3.55	7.01	0.2511	15.38	0.913	99.4211		5.04923	2.65537	10.7724	52.8862	2.29328	3.57067	7.05082	0.252562	15.4696	0.918316	100
	5.84	3.19	9.99	51.37	2.08	3.1	6.82	0.2345	15.85	1.0558	98.4745		5.93047	3.23942	10.1448	52.1658	2.11222	3.14802	6.92565	0.238133	16.0955	1.07216	100
	5.74	4.91	10.82	50.34	2.39	3.66	5	0.1765	15.37	0.9797	98.4065		5.83295	4.98951	10.9952	51.1552	2.4287	3.71927	5.08097	0.179358	15.6189	0.995564	100
	4.78	3.62	11.65	50.13	2.3	3.91	7.75	0.2711	15.26	0.9252	99.6711		4.79577	3.63195	11.6884	50.2954	2.30759	3.9229	7.77557	0.271995	15.3104	0.928253	100
	5.64	3.26	8.93	51.69	1.94	3.65	6.62	0.2284	16.71	1.0604	98.6684		5.71612	3.304	9.05052	52.3876	1.96618	3.69926	6.70934	0.231482	16.9355	1.07471	100
	6.01	2.95	9.98	52.12	2.03	3.5	6.86	0.2524	16.15	1.0641	99.8524		6.01888	2.95436	9.99475	52.197	2.033	3.50517	6.87014	0.252773	16.1739	1.06567	100
	5.67	2.83	9.81	50.19	2.11	3.37	6.9	0.27	15.56	1.2012	96.71		5.86289	2.92627	10.1437	51.8974	2.18178	3.48464	7.13473	0.279185	16.0893	1.24206	100
	5.78	3.2	9.98	50.78	2.1	3.2	6.62	0.2832	15.36	1.0915	97.3032		5.9402	3.28869	10.2566	52.1874	2.1582	3.28869	6.80348	0.291049	15.7857	1.12175	100
	5.82	3.03	8.81	53.45	1.8	2.97	6.28	0.2543	16.99	0.8945	99.4043		5.85488	3.04816	8.8628	53.7703	1.81079	2.9878	6.31763	0.255824	17.0918	0.89986	100
M178-15 187 cm	5.22	2.83	9.83	49.71	2.04	4.14	8.04	0.2252	16.57	1.0213	98.6052	MB3	5.29384	2.87003	9.96905	50.4132	2.06886	4.19856	8.15373	0.228386	16.8044	1.03575	100
	4.98	2.56	9.94	49.96	2	4.18	8.41	0.2364	16.76	0.9068	99.0264		5.02896	2.58517	10.0377	50.4512	2.01966	4.2211	8.49268	0.238724	16.9248	0.915715	100
	5.17	2.66	9.71	48.88	1.99	3.99	8.25	0.1968	16.95	0.9225	97.7968		5.28647	2.71993	9.92875	49.9812	2.03483	4.07989	8.43586	0.201234	17.3319	0.943282	100
	5.16	2.84	9.69	49.83	2.1	4.07	7.97	0.2603	16.05	0.94	97.9703		5.2669	2.89884	9.89075	50.8624	2.14351	4.15432	8.13512	0.265693	16.3825	0.959474	100
	5.33	2.72	9.82	50.12	1.99	4.01	8.18	0.1547	16.38	0.9088	98.7047		5.39995	2.75569	9.94887	50.7777	2.01611	4.06262	8.28735	0.15673	16.595	0.920726	100
	4.83	2.63	10.01	49.99	2	4.07	8.34	0.2239	16.56	0.9211	98.6539		4.8959	2.66589	10.1466	50.6721	2.02729	4.12553	8.4538	0.226955	16.786	0.933668	100
	5.03	2.74	10.48	49.26	2.05	4.1	8.23	0.1429	16.1	0.9635	98.1329		5.1257	2.79213	10.6794	50.1972	2.089	4.17801	8.38659	0.145619	16.4063	0.981832	100
	5.3	2.72	10.03	49.64	2.01	3.81	8.19	0.2213	16.56	0.8877	98.4813		5.38173	2.76195	10.1847	50.4055	2.041	3.86875	8.3163	0.224713	16.8154	0.901389	100
	4.97	2.78	10.2	49.86	2.02	4.04	8.26	0.2195	16.68	0.9895	99.0295		5.01871	2.80724	10.3	50.3486	2.0398	4.07959	8.34095	0.221651	16.8435	0.999197	100
	4.72	2.59	9.61	50.03	1.99	4.01	8.38	0.1971	16.61	0.8786	98.1371		4.8096	2.63917	9.79242	50.9797	2.02778	4.08612	8.53907	0.200841	16.9253	0.895278	100
	5.11	2.72	10.1	49.76	2.03	4.03	8.25	0.1607	16.34	0.9193	98.5007		5.18778	2.7614	10.2537	50.5174	2.0609	4.09134	8.37557	0.163146	16.5887	0.933293	100
	5.07	2.67	9.94	49.96	2.03	3.94	8.03	0.246	16.47	0.9086	98.356		5.15474	2.71463	10.1061	50.7951	2.06393	4.00586	8.16422	0.250112	16.7453	0.923787	100
	5.31	2.77	8.85	50.53	1.91	3.8	7.93	0.2416	16.81	0.9833	98.1516		5.41	2.82216	9.01666	51.4816	1.94597	3.87156	8.07934	0.24615	17.1266	1.00182	100
	4.85	2.59	10.38	48.24	1.95	4.13	8.25	0.174	16.79	0.9757	97.354		4.98182	2.66039	10.6621	49.5511	2.003	4.24225	8.47423	0.178729	17.2463	1.00222	100
	4.65	2.68	9.87	50.2	1.92	3.86	8.15	0.1389	16.66	0.9282	98.1289		4.73867	2.7311	10.0582	51.1572	1.95661	3.9336	8.3054	0.141549	16.9777	0.945899	100
	5.2	2.66	10.93	47.68	1.97	4.19	8.45	0.2204	15.87	0.8498	97.1704		5.35142	2.73746	11.2483	49.0684	2.02737	4.31201	8.69606	0.226818	16.3321	0.874546	100
	5.09	2.63	10.16	49.44	1.99	3.95	8.31	0.167	16.72	1.0286	98.457		5.16977	2.67122	10.3192	50.2148	2.02119	4.0119	8.44023	0.169617	16.982	1.04472	100
	4.63	2.46	10.89	47.45	2.15	4.28	8.86	0.1823	15.97	0.8211	96.8723		4.77949	2.53943	11.2416	48.982	2.21942	4.41819	9.14606	0.188186	16.4856	0.847611	100
	5.26	2.66	9.78	48.48	2.07	3.97	8.36	0.1941	16.35	1.0301	97.1241		5.41575	2.73876	10.0696	49.9155	2.13129	4.08755	8.60754	0.199847	16.8341	1.0606	100
	5.21	2.65	10.08	50.51	2	3.87	8.23	0.1877	16.76	0.9467	99.4977		5.2363	2.66338	10.1309	50.765	2.0101	3.88954	8.27155	0.188648	16.8446	0.951479	100
	5.09	2.76	10.69	48.74	2.11	3.89	8.09	0.2017	16.22	0.9559	97.7917		5.20494	2.82233	10.9314	49.8406	2.15765	3.97784	8.27269	0.206255	16.5863	0.977486	100
	5.25	2.61	10.05	48.81	1.93	4.05	8.13	0.1536	16.99	0.875	97.9736		5.35859	2.66398	10.2579	49.8195	1.96992	4.13377	8.29815	0.156777	17.3414	0.893098	100
	5.26	2.78	10.5	48.35	1.98	4.02	8.16	0.2597	16.62	0.8479	97.9297		5.3712	2.83877	10.722	49.3722	2.02186	4.10499	8.33251	0.26519	16.9714	0.865825	100
	4.84	2.73	10.5	50.7	2.09	4.19	8.22	0.2458	16.04	0.9641	99.5558		4.8616	2.74218	10.5468	50.9262	2.09933	4.2087	8.25668	0.246897	16.1116	0.968402	100
	5.1	2.61	10.14	49.87	2.01	4.01	8.23	0.2345	16.69	0.8899	98.8945		5.15701	2.63918	10.2534	50.4275	2.03247	4.05483	8.322	0.237121	16.8766	0.899848	100
	4.99	2.78	10.83	50.01	2.12	3.94	8.26	0.1787	16.07	0.9207	99.1787		5.03132	2.80302	10.9197	50.4241	2.13756	3.97263	8.3284	0.18018	16.2031	0.928324	100
	5.17	2.74	10.31	49.63	2.1	4	8.13	0.1456	15.9	0.9321	98.1256		5.26876	2.79234	10.5069	50.578	2.14011	4.07641	8.2853	0.148381	16.2037	0.949905	100
M178-15 630 cm	6.38	2.92	9.96	51.33	2.02	3.15	6.7	0.2122	15.79	1.0236	98.4622	M1	6.47964	2.96561	10.1156	52.1317	2.05155	3.1992	6.80464	0.215514	16.0366	1.03959	100
	6.2	2.97	9.92	51.4	2.07	3.05	6.54	0.2138	15.91	0.9201	98.2738		6.3089	3.02217	10.0942	52.3029	2.10636	3.10357	6.65488	0.217555	16.1895	0.936262	100
	6.08	2.82	10.53	51.39	2.12	3.04	6.8	0.2206	15.42	1.1197	98.4206		6.17757	2.86525	10.699	52.2147	2.15402	3.08878	6.90912	0.22414	15.6675	1.13767	100
	5.91	2.95	9.98	51.25	2.04	3.14	6.75	0.243	15.44	1.1081	97.703		6.04894	3.01935	10.2146	52.4549	2.08796	3.21382	6.90869	0.248713	15.803	1.13415	100
	6.15	2.73	9.12	50.8	1.98	3.16	6.72	0.1653	15.87	0.9855	96.6953		6.36019	2.8233	9.43169	52.5362	2.04767	3.268	6.94967	0.170949	16.4124	1.01918	100
	6.86	3.23	9.69	51.59	2.02	3.15	6.18	0.1988	15.85	1.0046	98.7688		6.94551	3.27026	9.81079	52.2331	2.04518	3.18927	6.25704	0.201278	16.0476	1.01712	100
	4.76	2.73	9.81	52.01	2.02	3.09	6.75	0.2641	16.03	0.946	97.4641		4.88385	2.80103	10.0652	53.3632	2.07256	3.1704	6.92563	0.270972	16.4471	0.970614	100
	6.31	3.13	9.81	51.81	2.1	2.9	6.28	0.3132	15.31	1.2373	97.9632		6.44119	3.19508	10.014	52.8872	2.14366	2.9603	6.41057	0.319712	15.6283	1.26303	100
	5.94	2.87	10.48	51.35	2.12	3.13	6.79	0.243	15.58	1.0337	98.503		6.03027	2.91362	10.6393	52.1304	2.15222	3.17757	6.89319	0.246693	15.8168	1.04941	100
	6.03	2.9	9.52	51.74	2	2.78	6.35	0.2402	15.99	1.1301	97.5502		6.18143	2.97283	9.75908	53.0394	2.05023	2.84981	6.50947	0.246232	16.3916	1.15848	100
	5.75	3.48	9.79	51.96	2.13	3.01	6.25	0.3005	15.85	0.9017	98.5205		5.83635	3.53226	9.93702	52.7403	2.16199	3.0552	6.34386	0.305013	16.088	0.915241	100
	6	2.7	10.22	51.56	2.09	2.96	6.97	0.2659	15.62	1.1486	98.3859		6.09843	2.7443	10.3877	52.4059	2.12429	3.00856	7.08435	0.270262	15.8763	1.16744	100
	5.75	2.71	10.24	51.19	2.03	3.72	6.72	0.2261	15.58	1.0676	98.1661		5.85742	2.76063	10.4313	52.1463	2.06792	3.7895	6.84554	0.230324	15.8711	1.08754	100
	5.73	2.7	9.5	52.28	1.9	3.19	6.76	0.229	16.42	0.9457	98.709		5.80494	2.73531	9.62425	52.9638	1.92485	3.23172	6.84841	0.231995	16.6348	0.958069	100
	6.19	2.71	9.21	51.45	1.99	2.99	6.66	0.2124	15.77	1.001	97.1824		6.36947	2.78857	9.47702	52.9417	2.0477	3.07669	6.85309	0.218558	16.2272	1.03002	100
M178-18 surface ash	4.74	3.33	10.26	51.87	2.08	2.81	6.82	0.2594	16.34	0.9562	99.4656	MB4	4.76547	3.34789	10.3151	52.1487	2.09118	2.8251	6.85664	0.260794	16.4278	0.961337	100
	5.49	2.83	9.95	49.07	2.13	3.62	8.17	0.1435	16.23	1.0909	98.7244		5.56094	2.86657	10.0786	49.704	2.15752	3.66677	8.27556	0.145354	16.4397	1.105	100
	4.58	2.64	9.78	51.27	1.94	2.88	7.95	0.2558	17.47	0.974	99.7398		4.59195	2.64689	9.80551	51.4038	1.94506	2.88751	7.97074	0.256467	17.5156	0.976541	100
	4.43	4.24	10.14	49.92	2.11	3.31	7.21	0.1582	15.56	1.0199	98.0981		4.51589	4.3222	10.3366	50.8878	2.15091	3.37417	7.34979	0.161267	15.8617	1.03967	100
	4.69	3.09	11.11	48.61	2.27	4.04	8.71	0.2741	15.09	0.774	98.6581		4.75379	3.13203	11.2611	49.2712	2.30088	4.09495	8.82847	0.277828	15.2952	0.784528	100
	5.12	3.68	10.37	50.18	2.03	3.09	7.02	0.3154	15.34	1.0327	98.1781		5.21501	3.74829	10.5624	51.1112	2.06767	3.14734	7.15027	0.321253	15.6247	1.05186	100
	4.34	3.22	11.4	51.2	2.19	3.13	7.65	0.3882	16.09	0.9392	100.547		4.31637	3.20247	11.3379	50.9213	2.17808	3.11296	7.60835	0.386087	16.0024	0.934087	100
	4.47	3.62	11.19	50.27	2.04	3.2	7.5	0.2105	16.1	0.8834	99.4839		4.49319	3.63878	11.2481	50.5308	2.05058	3.2166	7.53891	0.211592	16.1835	0.887983	100
M178-18 114.5 cm	5.7	2.55	10.22	51.09	1.97	3.37	7.31	0.2496	15.91	0.8456	99.2152	FV	5.74509	2.57017	10.3008	51.4941	1.98558	3.39666	7.36782	0.251574	16.0358	0.852289	100
	5.08	2.31	10.13	51.88	1.83	3.16	7.65	0.2974	16.43	0.8684	99.6358		5.09857	2.31844	10.167	52.0696	1.83669	3.17155	7.67796	0.298487	16.4901	0.871574	100
	5.53	3.1	10.09	50.73	2.07	3.48	6.99	0.2714	15.4	0.828	98.4894		5.61482	3.14755	10.2448	51.5081	2.10175	3.53338	7.09721	0.275563	15.6362	0.8407	100
	5.36	3.26	8.63	51.13	1.6428	2.69	7.1	0.2539	17.49	0.7415	98.2982		5.4528	3.31644	8.77941	52.0152	1.67124	2.73657	7.22292	0.258296	17.7928	0.754337	100
	6.03	3.1	7.36	52.29	1.6309	2.33	5.43	0.1133	17.23	0.6285	96.1427		6.27193	3.22437	7.65529	54.3879	1.69633	2.42348	5.64785	0.117846	17.9213	0.653716	100
	5.72	3.31	9.58	51.28	2.05	3.3	6.45	0.1708	15.49	0.885	98.2358		5.82272	3.36944	9.75205	52.2009	2.08682	3.35926	6.56583	0.173867	15.7682	0.900894	100
	5.45	2.77	10.49	50.87	2.05	3.33	6.96	0.2666	15.46	0.9061	98.5527		5.53004	2.81068	10.6441	51.6171	2.08011	3.3789	7.06221	0.270515	15.687	0.919407	100
	5.7	2.78	10.43	50.07	1.97	3.66	7.46	0.2264	15.3	0.8967	98.4931		5.78721	2.82253	10.5896	50.836	2.00014	3.716	7.57413	0.229864	15.5341	0.910419	100
	5.72	2.93	8.61	54.02	1.87	1.9	5.61	0.2851	17.02	0.8751	98.8402		5.78712	2.96438	8.71103	54.6539	1.89194	1.92229	5.67583	0.288445	17.2197	0.885369	100
	5.21	2.34	9.48	51.17	1.8	2.91	7.81	0.1885	17.19	0.781	98.8795		5.26904	2.36652	9.58743	51.7499	1.8204	2.94298	7.8985	0.190636	17.3848	0.78985	100
	5.31	2.44	9.89	50.85	1.9	3.17	7.57	0.2735	16.54	0.8018	98.7453		5.37747	2.471	10.0157	51.4961	1.92414	3.21028	7.66619	0.276975	16.7502	0.811988	100
	3.74	2.48	11.03	49.34	2.02	4.3	8.69	0.1566	15.88	0.7236	98.3602		3.80235	2.52135	11.2139	50.1626	2.05368	4.37169	8.83487	0.159211	16.1447	0.735663	100
M178-18 123.5 cm	6.14	3.12	7.29	54.66	1.625	2.43	5.42	0.1959	17	0.6569	98.5378	FG	6.23111	3.1663	7.39818	55.4711	1.64911	2.46606	5.50043	0.198807	17.2523	0.666648	100
	5.93	2.98	7.19	54.19	1.635	2.53	5.43	0.1142	17.02	0.6233	97.6425		6.07318	3.05195	7.3636	55.4984	1.67448	2.59108	5.5611	0.116957	17.4309	0.638349	100
	6.12	3.03	7.24	53.7	1.69	2.58	5.49	0.2081	17.07	0.8258	97.9539		6.24784	3.09329	7.39123	54.8217	1.7253	2.63389	5.60468	0.212447	17.4266	0.84305	100
	6	2.91	7.51	53.59	1.67	2.69	5.86	0.2301	16.62	0.6837	97.7638		6.13724	2.97656	7.68178	54.8158	1.7082	2.75153	5.99404	0.235363	17.0002	0.699339	100
	5.96	3.13	6.96	54.76	1.6327	2.41	5.09	0.1772	17.45	0.6205	98.1904		6.06984	3.18768	7.08827	55.7692	1.66279	2.45442	5.18381	0.180466	17.7716	0.631936	100
	6.08	2.95	8.14	54.57	1.81	2.42	5.65	0.2315	16.39	0.7702	99.0117		6.14069	2.97945	8.22125	55.1147	1.82807	2.44416	5.7064	0.233811	16.5536	0.777888	100
	5.96	2.92	7.69	52.82	1.7	2.77	5.94	0.1658	16.69	0.7182	97.374		6.12073	2.99875	7.89739	54.2445	1.74585	2.8447	6.10019	0.170271	17.1401	0.737569	100
	6.1	3.07	7.2	54.64	1.6169	2.57	5.27	0.1934	17.38	0.5626	98.6029		6.18643	3.1135	7.30202	55.4142	1.63981	2.60641	5.34467	0.19614	17.6263	0.570571	100
	5.09	3.44	9.41	52.16	1.91	3.03	6.76	0.3277	15.7	0.9826	98.8103		5.15128	3.48142	9.5233	52.788	1.933	3.06648	6.84139	0.331646	15.889	0.994431	100
	6.16	2.91	7.88	53.9	1.76	2.68	5.59	0.171	16.76	0.7393	98.5503		6.25062	2.95281	7.99592	54.6929	1.78589	2.71942	5.67223	0.173515	17.0065	0.750175	100
	5.92	3.2	7.84	53.6	1.6454	2.61	5.56	0.1537	16.85	0.7155	98.0946		6.03499	3.26216	7.99228	54.6411	1.67736	2.6607	5.668	0.156685	17.1773	0.729398	100
	7.18	4.04	5.23	56.7	1.2156	1.5044	2.75	0.1212	17.63	0.2873	96.6586		7.42821	4.17966	5.4108	58.6601	1.25762	1.55641	2.84507	0.12539	18.2395	0.297232	100
	6.47	2.89	7.45	53.67	1.6164	2.77	5.72	0.2107	17.29	0.691	98.7782		6.55003	2.92575	7.54215	54.3339	1.63639	2.80426	5.79075	0.213306	17.5039	0.699547	100
	6.37	2.85	7.44	53.6	1.6139	2.87	5.79	0.3052	17.03	0.7461	98.6152		6.45945	2.89002	7.54448	54.3527	1.63656	2.9103	5.87131	0.309486	17.2691	0.756577	100
	5.97	2.91	7.31	54.17	1.5985	2.73	5.77	0.2097	17.15	0.633	98.4513		6.06391	2.95578	7.42499	55.0221	1.62365	2.77294	5.86077	0.212999	17.4198	0.642957	100
	5.93	2.85	7.45	54.06	1.68	2.77	5.77	0.1949	16.97	0.6508	98.3258		6.03097	2.89853	7.57685	54.9805	1.70861	2.81716	5.86825	0.198219	17.2589	0.661881	100
	5.87	2.86	7.41	53.36	1.71	2.95	5.99	0.148	17.16	0.6684	98.1264		5.98208	2.91461	7.55148	54.3788	1.74265	3.00633	6.10437	0.150826	17.4876	0.681162	100
	6.32	3.02	7.35	54.2	1.6502	2.71	5.44	0.1645	17.1	0.6908	98.6456		6.40677	3.06146	7.45092	54.9442	1.67286	2.74721	5.51469	0.166759	17.3348	0.700285	100
	6.53	3.09	6.96	55.48	1.6135	2.46	5.39	0.2578	16.83	0.6406	99.252		6.57921	3.11329	7.01245	55.8981	1.62566	2.47854	5.43062	0.259743	16.9568	0.645428	100
	6.3	3.29	6.8	55.55	1.5085	2.18	4.63	0.1967	17.31	0.5499	98.3151		6.40797	3.34638	6.91654	56.502	1.53435	2.21736	4.70935	0.200071	17.6067	0.559324	100
	5.87	2.59	9.11	52.48	2.22	3.16	7.26	0.152	15.32	1.1353	99.2973		5.91154	2.60833	9.17447	52.8514	2.23571	3.18236	7.31138	0.153076	15.4284	1.14333	100
	5.09	3.44	9.41	52.16	1.91	3.03	6.76	0.3277	15.7	0.9826	98.8103		5.15128	3.48142	9.5233	52.788	1.933	3.06648	6.84139	0.331646	15.889	0.994431	100
	5.96	2.92	7.69	52.82	1.7	2.77	5.94	0.1658	16.69	0.7182	97.374		6.12073	2.99875	7.89739	54.2445	1.74585	2.8447	6.10019	0.170271	17.1401	0.737569	100
	6.21	3.14	6.81	54.11	1.5155	2.35	4.91	0.1576	17.53	0.6308	97.3639		6.37813	3.22501	6.99438	55.575	1.55653	2.41363	5.04294	0.161867	18.0046	0.647879	100
M178-18 189 cm	5.73	3.16	9.02	53.71	1.77	3.2	5.68	0.2592	16.58	0.8433	99.9525	FL	5.73272	3.1615	9.02429	53.7355	1.77084	3.20152	5.6827	0.259323	16.5879	0.843701	100
	5.82	2.84	9.13	54.22	2.09	2.7	5.97	0.2015	15.62	0.9495	99.541		5.84684	2.8531	9.1721	54.47	2.09964	2.71245	5.99753	0.202429	15.692	0.953878	100
	5.81	3.82	9.12	53.35	2.05	2.81	5.42	0.2426	15.64	1.029	99.2916		5.85145	3.84725	9.18507	53.7306	2.06463	2.83005	5.45867	0.244331	15.7516	1.03634	100
	6.21	3.12	7.62	53.73	1.82	2.66	6.25	0.2637	16.38	0.8254	98.8791		6.2804	3.15537	7.70638	54.3391	1.84063	2.69015	6.32085	0.266689	16.5657	0.834757	100
	6.13	2.27	8.45	52.74	1.8	2.84	6.63	0.2463	16.74	0.8496	98.6959		6.211	2.29999	8.56165	53.4369	1.82378	2.87753	6.7176	0.249554	16.9612	0.860826	100
M178-29 292 cm	5.26	2.94	9.69	50.72	1.99	3.48	7.44	0.2968	15.78	1.0999	97.5968	MB2	5.38952	3.01239	9.9286	51.9689	2.039	3.56569	7.6232	0.304108	16.1686	1.12698	100
	4.74	2.6	9.46	50.43	2.38	3.84	8.1	0.1338	17.45	0.6237	99.1338		4.78142	2.62272	9.54266	50.8706	2.4008	3.87355	8.17078	0.134969	17.6025	0.62915	100
	5.93	3.53	8.72	51.44	1.81	3.13	6.5	0.2044	17.69	1.0606	98.9544		5.99266	3.5673	8.81214	51.9835	1.82913	3.16307	6.56868	0.20656	17.8769	1.07181	100
	5.4	2.65	10.35	49.75	2.45	3.71	7.85	0.2598	16.01	1.0463	98.4298		5.48614	2.69227	10.5151	50.5436	2.48908	3.76918	7.97523	0.263944	16.2654	1.06299	100
	6.86	3.77	8.55	50.89	1.95	2.52	5.77	0.207	17.5	0.923	98.017		6.99879	3.84627	8.72298	51.9196	1.98945	2.57098	5.88673	0.211188	17.854	0.941673	100
	6.34	3.28	8.44	52.67	2.13	2.96	5.86	0.2202	16.22	1	98.1202		6.46146	3.34284	8.60169	53.6791	2.17081	3.01671	5.97227	0.224419	16.5307	1.01916	100
	4.97	2.41	10.43	49.31	2.4	4.18	8.58	0.1984	15.6	0.8731	98.0784		5.06737	2.45722	10.6343	50.2761	2.44702	4.2619	8.7481	0.202287	15.9056	0.890206	100
	5.57	2.98	8.96	51.91	2.33	2.98	6.54	0.2201	15.96	0.9197	97.4501		5.71575	3.05798	9.19445	53.2683	2.39097	3.05798	6.71113	0.225859	16.3776	0.943765	100
M178-35 15 cm	5.82	2.83	10.98	50.59	2.27	3.48	7.4	0.2498	15.51	1.0328	99.1298	MB4	5.87109	2.85484	11.0764	51.0341	2.28993	3.51055	7.46496	0.251993	15.6462	1.04187	100
	5.43	2.75	10.59	49.6	2.22	3.59	8.07	0.2573	15.65	0.9074	98.1573		5.53194	2.80163	10.7888	50.5311	2.26168	3.65739	8.2215	0.26213	15.9438	0.924435	100
	5.43	3.41	10.36	50.1	2.15	3.88	8.22	0.1831	16.02	0.8726	99.7531		5.44344	3.41844	10.3856	50.224	2.15532	3.8896	8.24035	0.183553	16.0597	0.87476	100
	5.71	2.64	11.12	50.74	2.29	3.47	7.75	0.2506	15.56	0.8726	99.5306		5.73693	2.65245	11.1724	50.9793	2.3008	3.48636	7.78655	0.251782	15.6334	0.876715	100
	6.51	3.75	8.98	48.56	2.03	2.98	7.72	0.1285	15.76	1.0253	96.4185		6.75182	3.8893	9.31357	50.3638	2.10541	3.09069	8.00676	0.133273	16.3454	1.06339	100
	6.34	3.09	10.17	50.92	2.2	3.49	7.11	0.2159	15.63	0.9323	99.1659		6.39333	3.11599	10.2555	51.3483	2.2185	3.51935	7.1698	0.217716	15.7615	0.940142	100
	5.62	2.87	10.74	50.27	2.26	3.2	7.39	0.1738	15.37	0.9222	97.8938		5.74092	2.93175	10.9711	51.3516	2.30862	3.26885	7.549	0.177539	15.7007	0.942041	100
	5.13	2.88	10.73	50.11	2.13	3.47	7.67	0.1623	15.79	0.97	98.0723		5.23083	2.93661	10.9409	51.095	2.17187	3.53821	7.82076	0.16549	16.1004	0.989066	100
	5.46	2.91	10.81	49.9	2.16	3.45	7.73	0.2548	15.85	0.956	98.5248		5.54175	2.95357	10.9719	50.6471	2.19234	3.50166	7.84574	0.258615	16.0873	0.970314	100
	5.13	2.64	11	50.34	2.21	3.65	8.46	0.3349	15.9	0.9165	99.6649		5.14725	2.64888	11.037	50.5093	2.21743	3.66227	8.48844	0.336026	15.9535	0.919582	100
	5.69	3.55	11.1	50.56	2.33	3.14	7.53	0.2458	15.31	0.8668	99.4558		5.72113	3.56942	11.1607	50.8367	2.34275	3.15718	7.5712	0.247145	15.3938	0.871543	100
	5.68	2.49	10.84	50.62	2.18	3.58	7.64	0.1992	15.98	0.739	99.2092		5.72528	2.50985	10.9264	51.0235	2.19738	3.60854	7.7009	0.200788	16.1074	0.744891	100
	6.5	3.64	9.6	51.93	2.03	3.13	5.93	0.1074	16.97	0.9523	99.8374		6.51059	3.64593	9.61564	52.0146	2.03331	3.1351	5.93966	0.107575	16.9976	0.953851	100
	5.19	2.99	12.24	49.07	2.24	3.52	7.92	0.2826	15.66	0.9541	99.1126		5.23647	3.01677	12.3496	49.5093	2.26006	3.55152	7.99091	0.28513	15.8002	0.962642	100
M178-35 414 cm	5.37	2.43	10.59	51.05	2.13	3.68	7.64	0.2304	16.18	0.9639	99.3004	MB2	5.40783	2.44712	10.6646	51.4097	2.14501	3.70593	7.69383	0.232023	16.294	0.970691	100
	4.77	2.47	9.74	51.01	2.13	3.79	7.4	0.0437	16.2	0.862	97.5537		4.88961	2.53194	9.98424	52.2891	2.18341	3.88504	7.58557	0.0447958	16.6062	0.883616	100
	5.74	3.56	9.89	49.95	2.17	2.85	6.39	0.2408	15.25	1.1959	96.0408		5.97663	3.70676	10.2977	52.0091	2.25946	2.96749	6.65342	0.250727	15.8787	1.2452	100
	4.35	3.37	10.18	50.86	2.15	3.58	7.01	0.2502	14.77	1.0757	96.5202		4.50683	3.4915	10.547	52.6936	2.22751	3.70907	7.26273	0.25922	15.3025	1.11448	100
	5.39	2.35	9.79	50.45	1.93	3.31	7.22	0.1385	16.07	0.7871	96.6485		5.57691	2.43149	10.1295	52.1995	1.99693	3.42478	7.47037	0.143303	16.6273	0.814394	100
	5.7	2.85	9	50.52	1.71	3.3	6.85	0.1528	16.83	0.8589	96.9128		5.88158	2.94079	9.2867	52.1293	1.76447	3.40512	7.06821	0.157668	17.3661	0.886261	100
	5.06	2.47	10.5	49.71	2.02	3.76	7.87	0.1896	15.81	0.8492	97.3896		5.19563	2.53621	10.7814	51.0424	2.07414	3.86078	8.08094	0.194682	16.2338	0.871962	100
	5.29	3.79	10.9	52.92	2.39	2.92	6.41	0.2593	15.18	1.0392	100.059		5.28686	3.78775	10.8935	52.8886	2.38858	2.91827	6.4062	0.259146	15.171	1.03858	100
	5.5	2.59	8.75	52.56	1.92	3.23	6.77	0.2751	16.7	0.7853	98.2951		5.5954	2.63492	8.90177	53.4716	1.9533	3.28602	6.88742	0.279872	16.9897	0.798921	100
	5.53	2.16	8.93	51.45	1.81	3.29	8.12	0.1041	17.82	0.7128	99.2141		5.5738	2.17711	9.00074	51.8575	1.82434	3.31606	8.18432	0.104925	17.9612	0.718446	100
	5.41	2.68	13.11	49.93	2.66	4.1	7.31	0.231	14.58	0.8939	100.011		5.4094	2.67971	13.1086	49.9245	2.65971	4.09955	7.3092	0.230975	14.5784	0.893802	100
	5.36	2.52	9.6	50.68	1.96	4.48	7.77	0.1958	15.96	0.8245	98.5258		5.4402	2.55771	9.74364	51.4383	1.98933	4.54703	7.88626	0.19873	16.1988	0.836837	100
	5.61	2.81	9.29	51.84	1.92	3.32	6.97	0.2778	16.53	1.0223	98.5678		5.69151	2.85083	9.42498	52.5932	1.9479	3.36824	7.07127	0.281836	16.7702	1.03715	100
	5.29	2.55	9.93	52.03	1.92	3.37	7.05	0.276	16.54	0.756	98.956		5.34581	2.5769	10.0348	52.5789	1.94026	3.40555	7.12438	0.278912	16.7145	0.763976	100
	5.29	2.76	10.28	52.2	2.27	3.26	6.79	0.2242	14.87	1.0685	97.9442		5.40103	2.81793	10.4958	53.2957	2.31765	3.32843	6.93252	0.228906	15.1821	1.09093	100
	5.58	3.85	8.99	52.1	1.93	3.07	6.12	0.2047	16.57	1.0269	98.4147		5.66988	3.91202	9.13481	52.9392	1.96109	3.11945	6.21858	0.207997	16.8369	1.04344	100
	5.24	3.1	9.56	51.31	1.94	3.2	6.67	0.2639	15.86	1.0475	97.1439		5.39406	3.19114	9.84107	52.8186	1.99704	3.29408	6.8661	0.271659	16.3263	1.0783	100
	5.56	2.69	9.77	50.77	2.05	3.42	7.28	0.1786	16.06	1.0177	97.7786		5.68632	2.75111	9.99196	51.9234	2.09657	3.4977	7.44539	0.182658	16.4249	1.04082	100
	5.8	3.01	8.04	54.15	1.4726	2.82	5.94	0.1897	17.54	0.852	98.9623		5.86082	3.04156	8.12431	54.7178	1.48804	2.84957	6.00229	0.191689	17.7239	0.860934	100
	5.35	2.51	9.6	51.72	2.07	3.85	7.58	0.1689	16.12	0.9199	98.9689		5.40574	2.53615	9.70002	52.2588	2.09157	3.89011	7.65897	0.17066	16.2879	0.929484	100
	5.54	2.47	10.46	49.37	1.99	4.57	7.88	0.2371	16.2	0.86	98.7171		5.612	2.5021	10.5959	50.0116	2.01586	4.62939	7.98241	0.240181	16.4105	0.871176	100
M178-35 505 cm	5.31	2.65	11.34	50.39	1.84	3.69	7.07	0.1903	15.26	0.8673	97.7403		5.43276	2.71127	11.6022	51.555	1.88254	3.77531	7.23345	0.1947	15.6128	0.887351	100
	5.72	2.68	10.63	51.68	2.12	3.59	7.14	0.3386	15.78	1.0868	99.6786		5.73844	2.68864	10.6643	51.8466	2.12684	3.60158	7.16302	0.339692	15.8309	1.0903	100
	5.79	2.69	10.59	50.07	2.17	3.45	7.2	0.2274	15.3	1.0445	97.4874		5.93923	2.75933	10.8629	51.3605	2.22593	3.53892	7.38557	0.233261	15.6943	1.07142	100
	3.35	2.63	10.95	51.46	2.23	3.44	7.15	0.2074	15.62	1.0408	97.0374		3.45228	2.7103	11.2843	53.0311	2.29808	3.54502	7.36829	0.213732	16.0969	1.07258	100
	5.5	2.78	10.15	49.06	2.12	3.38	7.1	0.1918	15.17	1.1576	95.4518		5.76207	2.91246	10.6336	51.3977	2.22102	3.54105	7.43831	0.200939	15.8928	1.21276	100
	5.56	2.75	10.35	51.48	2.19	3.36	7.18	0.3044	15.43	1.2376	98.6044		5.63869	2.78892	10.4965	52.2086	2.221	3.40756	7.28162	0.308708	15.6484	1.25512	100
	6.33	2.78	10.32	50.94	2.15	3.54	6.83	0.2291	15.74	1.1568	98.8591		6.40305	2.81208	10.4391	51.5279	2.17481	3.58085	6.90882	0.231744	15.9217	1.17015	100
	4.95	2.63	10.73	50.4	2.15	3.58	7.27	0.1766	15.59	0.9981	97.4766		5.07814	2.69808	11.0078	51.7047	2.20566	3.67268	7.4582	0.181172	15.9936	1.02394	100
	5.74	2.7	10	51.43	1.98	3.41	6.84	0.2121	15.92	1.0673	98.2321		5.8433	2.74859	10.18	52.3556	2.01563	3.47137	6.9631	0.215917	16.2065	1.08651	100
	5.47	2.58	10.01	50.43	2.22	3.44	7.22	0.1859	15.91	1.0733	97.4659		5.61222	2.64708	10.2703	51.7412	2.27772	3.52944	7.40772	0.190733	16.3237	1.10121	100
	5.42	2.63	10.75	49.74	2.06	3.57	7.09	0.1858	15.63	1.0056	97.0758		5.58327	2.70922	11.0738	51.2383	2.12205	3.67754	7.30357	0.191397	16.1008	1.03589	100
	5.8	2.72	10.94	50.99	2.13	3.55	7.4	0.2009	15.43	1.1103	99.1609		5.84908	2.74302	11.0326	51.4215	2.14802	3.58004	7.46262	0.2026	15.5606	1.1197	100
	5.91	2.72	10.41	50.95	2.16	3.37	7.14	0.2608	15.25	1.1228	98.1708		6.02012	2.77068	10.604	51.8993	2.20025	3.43279	7.27304	0.265659	15.5342	1.14372	100
	5.74	2.52	10.44	50.11	1.96	3.8	7.35	0.2777	16.15	0.97	98.3477		5.83644	2.56234	10.6154	50.9519	1.99293	3.86384	7.47348	0.282366	16.4213	0.986297	100
	5.53	2.64	10.24	51.2	2.12	3.46	7.34	0.1849	15.46	1.1309	98.1749		5.6328	2.68908	10.4304	52.1518	2.15941	3.52432	7.47645	0.188337	15.7474	1.15192	100
	5.32	2.72	10.13	51.1	2.11	3.37	7.14	0.1412	15.61	1.1633	97.6412		5.44852	2.78571	10.3747	52.3345	2.16097	3.45141	7.31249	0.144611	15.9871	1.1914	100
	6.43	3.87	8.73	53.33	2.12	2.43	5.22	0.2362	16.07	1.1951	98.4362		6.53215	3.93148	8.86869	54.1772	2.15368	2.4686	5.30293	0.239952	16.3253	1.21409	100
	5.53	2.57	10.73	51.42	2.1	3.56	7.33	0.1839	15.88	0.9702	99.3039		5.56876	2.58802	10.8052	51.7804	2.11472	3.58495	7.38138	0.185189	15.9913	0.977001	100
	5.6	2.55	10.45	51.26	2.12	3.52	7.46	0.2715	15.88	1.0677	99.1115		5.6502	2.57286	10.5437	51.7195	2.13901	3.55156	7.52688	0.273934	16.0224	1.07727	100
	5.58	2.38	9.28	51.24	1.98	3.19	7.52	0.2041	16.51	0.9519	97.8841		5.70062	2.43145	9.4806	52.3476	2.0228	3.25896	7.68256	0.208512	16.8669	0.972477	100
	5.95	2.93	9.71	51.76	2.14	3.27	6.91	0.2427	15.57	1.2406	98.4827		6.04167	2.97514	9.8596	52.5575	2.17297	3.32038	7.01646	0.246439	15.8099	1.25971	100
	5.78	2.41	9.11	52.06	1.9	3.13	7.68	0.1991	17.05	0.8588	99.3191		5.81963	2.42652	9.17246	52.4169	1.91303	3.15146	7.73265	0.200465	17.1669	0.864688	100
	5.65	2.67	10.77	50.98	2.14	3.49	7.35	0.223	15.74	1.0213	99.013		5.70632	2.69662	10.8774	51.4882	2.16133	3.52479	7.42327	0.225223	15.8969	1.03148	100
	5.79	2.58	10.22	50.87	2.07	3.48	7.28	0.2047	15.56	1.0596	98.0547		5.90487	2.63118	10.4228	51.8792	2.11107	3.54904	7.42443	0.208761	15.8687	1.08062	100
	5.9	2.69	10.71	50.97	2.15	3.51	7.27	0.2057	15.72	0.9749	99.1257		5.95204	2.71373	10.8045	51.4196	2.16896	3.54096	7.33412	0.207514	15.8587	0.983499	100
	5.69	2.65	10.48	50.77	2.16	3.85	7.21	0.2032	15.44	1.1133	98.4532		5.7794	2.69163	10.6447	51.5676	2.19394	3.91049	7.32328	0.206392	15.6826	1.13079	100
	5.8	2.73	9.79	51.03	2.17	3.47	7.25	0.2171	15.58	1.1533	98.0371		5.91613	2.78466	9.98602	52.0517	2.21345	3.53948	7.39516	0.221447	15.8919	1.17639	100
	6.26	3.26	9.08	52.21	2.18	3.28	6.77	0.2119	15.6	1.0839	98.8519		6.33271	3.29786	9.18546	52.8164	2.20532	3.3181	6.84863	0.214361	15.7812	1.09649	100
	5.91	2.7	10.87	50.86	2.19	3.47	7.24	0.2914	15.55	1.0764	99.0814		5.96479	2.72503	10.9708	51.3315	2.2103	3.50217	7.30712	0.294102	15.6942	1.08638	100
	5.61	2.59	9.91	51.49	1.98	3.68	7.31	0.2785	16.12	1.0254	98.9685		5.66847	2.61699	10.0133	52.0267	2.00064	3.71835	7.38619	0.281403	16.288	1.03609	100
	5.52	2.75	10.24	51.21	2.2	3.39	7.3	0.2871	15.55	1.0866	98.4471		5.60707	2.79338	10.4015	52.0178	2.2347	3.44347	7.41515	0.291629	15.7953	1.10374	100
	5.4	2.75	9.92	50.81	2.15	3.27	7.22	0.2852	15.8	1.1637	97.6052		5.53249	2.81747	10.1634	52.0567	2.20275	3.35023	7.39715	0.292198	16.1877	1.19225	100
	4.75	2.74	10.27	51.59	2.09	3.68	7.09	0.3051	15.58	1.0435	98.0951		4.84224	2.79321	10.4694	52.5918	2.13059	3.75146	7.22768	0.311025	15.8825	1.06376	100
	4.94	2.29	11.28	50.24	1.87	6.88	6.5	0.2844	14.87	1.0405	99.1544		4.98213	2.30953	11.3762	50.6685	1.88595	6.93867	6.55543	0.286825	14.9968	1.04937	100
M178-35 523 cm	5.67	2.98	10.76	52.38	2.07	3.39	6.71	0.2025	15.36	0.9966	99.5225		5.6972	2.9943	10.8116	52.6313	2.07993	3.40626	6.74219	0.203472	15.4337	1.00138	100
	5.14	2.37	9.91	50.85	1.84	5.07	7.45	0.1801	15.83	0.889	98.6401		5.21086	2.40267	10.0466	51.551	1.86537	5.1399	7.55271	0.182583	16.0482	0.901256	100
	4.91	2.63	11.35	50.64	1.89	5.79	6.95	0.2595	14.35	0.8776	98.7695		4.97117	2.66277	11.4914	51.2709	1.91355	5.86213	7.03659	0.262733	14.5288	0.888533	100
	5.56	3.05	10.22	52.05	2.08	3.2	6.84	0.2837	15.35	1.004	98.6337		5.63702	3.09225	10.3616	52.771	2.10881	3.24433	6.93475	0.28763	15.5626	1.01791	100
	5.65	2.88	10.15	51.13	2.1	3.31	7.37	0.1707	15.14	0.9876	97.9007		5.77115	2.94176	10.3676	52.2264	2.14503	3.38098	7.52804	0.17436	15.4646	1.00878	100
	5.71	2.73	10.23	51.49	2.04	3.55	7.45	0.16	15.12	1.054	98.48		5.79813	2.77214	10.3879	52.2847	2.07149	3.60479	7.56499	0.16247	15.3534	1.07027	100
	6.69	3.62	9.15	51.53	2.03	3.43	6.55	0.2169	16.35	0.9445	99.5669		6.7191	3.63575	9.1898	51.7541	2.03883	3.44492	6.57849	0.217843	16.4211	0.948608	100
	5.39	2.88	9.89	51.48	2.04	3.24	7.35	0.1996	15.31	1.0628	97.7796		5.5124	2.9454	10.1146	52.649	2.08632	3.31357	7.51691	0.204133	15.6577	1.08693	100
	5.36	2.32	9.28	51.25	1.88	3	7.98	0.173	16.92	0.7934	98.163		5.46031	2.36342	9.45366	52.2091	1.91518	3.05614	8.12934	0.176237	17.2366	0.808248	100
	5.73	2.74	10.32	49.57	2.04	3.85	7.33	0.1634	14.67	0.9873	96.4134		5.94316	2.84193	10.7039	51.414	2.11589	3.99322	7.60268	0.169479	15.2157	1.02403	100
	5.75	3.35	9.78	52.39	2.01	3.07	6.95	0.2211	15.49	0.9924	99.0111		5.80743	3.38346	9.87768	52.9133	2.03008	3.10066	7.01941	0.223308	15.6447	1.00231	100
	5.18	2.99	9.65	51.72	1.9	3.76	6.88	0.2108	15.96	1.1429	98.2508		5.27222	3.04323	9.8218	52.6408	1.93383	3.82694	7.00249	0.214553	16.2441	1.16325	100
	5.6	2.78	9.42	51.42	1.8	3.63	7.43	0.1897	16.95	1.0195	99.2197		5.64404	2.80186	9.49408	51.8244	1.81416	3.65855	7.48843	0.191192	17.0833	1.02752	100
	5.69	2.66	10.65	49.51	2.04	3.65	7.58	0.3063	15.31	0.8892	97.3963		5.84211	2.73111	10.9347	50.8336	2.09454	3.74758	7.78264	0.314488	15.7193	0.912971	100
	5.05	2.48	10.04	51.47	2.01	3.46	7.85	0.1924	16.27	0.9016	98.8224		5.11018	2.50955	10.1596	52.0833	2.03395	3.50123	7.94354	0.194693	16.4639	0.912344	100
	5.4	3.35	9.2	50.76	2.07	3.17	6.68	0.1729	15.5	1.212	96.3029		5.60731	3.47861	9.55319	52.7087	2.14947	3.2917	6.93645	0.179538	16.0951	1.25853	100
	4.7	2.37	11.31	49.83	1.98	3.68	8.74	0.24	16.39	0.7593	99.24		4.73599	2.38815	11.3966	50.2116	1.99516	3.70818	8.80693	0.241838	16.5155	0.765115	100
	5.16	2.35	9.99	52.38	2.27	2.98	7.43	0.1634	16.06	1.0279	98.7834		5.22355	2.37894	10.113	53.0251	2.29796	3.0167	7.52151	0.165412	16.2578	1.04056	100
	5.49	2.73	10.06	51.99	2.02	3.4	7.27	0.2191	15.63	0.9721	98.8091		5.55617	2.7629	10.1812	52.6166	2.04435	3.44098	7.35762	0.221741	15.8184	0.983816	100
M178-35 531 cm	5.88	2.87	9.28	50.94	2.04	3.45	7.43	0.2426	15.72	0.9976	97.8526		6.00904	2.93298	9.48365	52.0579	2.08477	3.52571	7.59305	0.247924	16.065	1.01949	100
	4.98	2.43	11.21	48.73	2.1	4.01	8.62	0.1473	15.23	0.8747	97.4573		5.10993	2.4934	11.5025	50.0014	2.15479	4.11462	8.8449	0.151143	15.6274	0.897521	100
	5.39	3.16	8.99	51.64	1.99	3.06	6.7	0.2437	16.35	1.0338	97.5237		5.52686	3.24024	9.21827	52.9512	2.04053	3.1377	6.87012	0.249888	16.7652	1.06005	100
	5.82	3.09	8.91	52.29	1.89	2.98	6.93	0.2046	16.67	1.0436	98.7846		5.89161	3.12802	9.01962	52.9334	1.91325	3.01666	7.01526	0.207117	16.8751	1.05644	100
	5.76	3.05	8.81	52.18	1.82	2.93	6.9	0.2166	16.64	1.0971	98.3066		5.85922	3.10254	8.96176	53.0788	1.85135	2.98047	7.01886	0.220331	16.9266	1.116	100
	5.39	2.83	9.98	51.1	2.03	3.46	7.57	0.2241	15.72	1.0842	98.3041		5.48299	2.87882	10.1522	51.9816	2.06502	3.51969	7.70059	0.227966	15.9912	1.1029	100
	5.45	2.85	9.61	50.93	2.04	3.53	7.51	0.2155	16.12	1.0101	98.2555		5.54676	2.9006	9.78062	51.8342	2.07622	3.59267	7.64334	0.219326	16.4062	1.02803	100
	5.49	3.23	9.52	52.26	2.18	3.23	7.1	0.2038	15.71	1.017	98.9238		5.54973	3.26514	9.62357	52.8285	2.20372	3.26514	7.17724	0.206017	15.8809	1.02806	100
	5.98	3.16	9.71	51.11	1.93	3.18	6.91	0.1555	15.99	1.1199	98.1255		6.09424	3.22037	9.89549	52.0864	1.96687	3.24075	7.042	0.158471	16.2955	1.14129	100
	5.57	3.25	9.24	51.85	1.96	3.17	6.77	0.1875	16.55	1.0914	98.5475		5.6521	3.2979	9.37619	52.6142	1.98889	3.21672	6.86978	0.190264	16.7939	1.10749	100
M178-35 538 cm	5.05	2.44	10.92	49.23	2.1	4.14	8.4	0.1355	15.31	0.7985	97.7255	MB1	5.16754	2.49679	11.1742	50.3758	2.14888	4.23636	8.5955	0.138654	15.6663	0.817085	100
	5.71	2.8	10.5	51.5	2.11	3.4	7.27	0.2159	15.38	1.0797	98.8859		5.77433	2.83155	10.6183	52.0802	2.13377	3.43831	7.35191	0.218332	15.5533	1.09186	100
	4.7	3.86	10.48	50.81	2.11	4.01	8.03	0.196	15.63	0.9731	99.826		4.70819	3.86673	10.4983	50.8986	2.11368	4.01699	8.044	0.196342	15.6572	0.974796	100
	5.04	2.23	11.45	49.2	1.94	4.03	9.12	0.1477	16.42	0.7167	99.5777		5.06137	2.23946	11.4986	49.4087	1.94823	4.04709	9.15868	0.148326	16.4896	0.719739	100
	5.09	2.55	11.58	48.87	1.94	3.98	8.92	0.2676	15.68	0.7945	98.8776		5.14778	2.57895	11.7114	49.4247	1.96202	4.02518	9.02125	0.270638	15.858	0.803519	100
	5.04	2.55	12.43	49.14	2.11	4.04	8.53	0.2023	15	0.8926	99.0423		5.08873	2.57466	12.5502	49.6152	2.1304	4.07907	8.61248	0.204256	15.145	0.901231	100
	5.67	2.87	9.58	50.49	2.1	3.51	7.04	0.2837	14.88	1.0268	96.4237		5.8803	2.97645	9.93532	52.3626	2.17789	3.64018	7.30111	0.294222	15.4319	1.06488	100
	4.38	3.79	9.92	50.44	2.06	3.59	7.56	0.2687	16.08	0.9869	98.0887		4.46535	3.86385	10.1133	51.4228	2.10014	3.65995	7.70731	0.273936	16.3933	1.00613	100
	5.47	2.76	9.99	51.61	2.08	3.43	7.42	0.1092	15.6	1.0268	98.4692		5.55504	2.80291	10.1453	52.4123	2.11234	3.48332	7.53535	0.110898	15.8425	1.04276	100
	5.25	2.59	11.29	49.33	2.21	3.97	8.46	0.1909	15.04	1.0594	98.3309		5.33912	2.63396	11.4816	50.1673	2.24751	4.03739	8.6036	0.19414	15.2953	1.07738	100
	4.1	3.99	10.29	50.76	1.99	3.57	7.67	0.2052	15.87	0.9189	98.4452		4.16475	4.05302	10.4525	51.5617	2.02143	3.62638	7.79114	0.208441	16.1206	0.933413	100
	5.23	2.42	11.32	49.89	2.13	4.11	8.62	0.2012	15.48	0.7927	99.4012		5.26151	2.43458	11.3882	50.1905	2.14283	4.13476	8.67193	0.202412	15.5733	0.797475	100
M178-35 546 cm	4.48	2.09	10.55	48.63	2.08	5.57	10.93	0.1971	13.55	0.8254	98.0771	MB1	4.56783	2.13098	10.7568	49.5834	2.12078	5.67921	11.1443	0.200964	13.8157	0.841583	100
	5.59	2.79	9.54	51.66	2.02	3.79	7.52	0.1807	15.41	0.9656	98.5007		5.67509	2.83247	9.68521	52.4463	2.05075	3.84769	7.63446	0.18345	15.6446	0.980298	100
	5.2	2.32	11.71	48.97	2.02	4.35	8.83	0.213	15.29	0.874	98.903		5.25768	2.34573	11.8399	49.5132	2.04241	4.39825	8.92794	0.215363	15.4596	0.883694	100
	4.62	2.29	11.02	49.26	2.07	4.63	9.32	0.2121	14.73	0.8362	98.1521		4.70698	2.33311	11.2275	50.1874	2.10897	4.71717	9.49547	0.216093	15.0073	0.851943	100
	5.15	2.3	10.42	49.94	1.95	3.57	8.93	0.3098	17.06	0.8538	99.6298		5.16914	2.30855	10.4587	50.1256	1.95725	3.58327	8.96318	0.310951	17.1234	0.856973	100
	5.05	2.42	11.35	49.51	2.08	4.09	8.81	0.1267	15.13	0.9192	98.5667		5.12343	2.45519	11.515	50.2299	2.11025	4.14947	8.93811	0.128542	15.35	0.932566	100
	4.31	2.24	11.23	48.82	2.03	4.69	9.55	0.2858	14.98	0.8173	98.1358		4.39187	2.28255	11.4433	49.7474	2.06856	4.77909	9.73141	0.291229	15.2646	0.832826	100
	3.49	1.88	11.01	48.46	2.12	6.63	12.19	0.2277	12.87	0.681	98.8777		3.52961	1.90134	11.135	49.01	2.14406	6.70525	12.3284	0.230284	13.0161	0.68873	100
	5.1	2.46	11.69	49.01	2.13	4.23	8.44	0.2734	15.07	0.8351	98.4034		5.18275	2.49991	11.8797	49.8052	2.16456	4.29863	8.57694	0.277836	15.3145	0.84865	100
	6	2.87	9.66	51.78	1.97	3.31	7.06	0.2143	16.25	1.0247	99.1143		6.05362	2.89565	9.74632	52.2427	1.9876	3.33958	7.12309	0.216215	16.3952	1.03386	100
	5.96	3.47	9.81	52.52	2.09	3.2	6.89	0.1388	16.13	1.1474	100.209		5.94758	3.46277	9.78956	52.4106	2.08565	3.19333	6.87564	0.138511	16.0964	1.14501	100
	5.08	2.42	11.57	49.19	2.15	4.06	8.7	0.1906	15.24	0.9354	98.6006		5.1521	2.45435	11.7342	49.8881	2.18051	4.11762	8.82348	0.193305	15.4563	0.948676	100
	5.09	2.4	11.44	49.51	2.13	4.04	8.74	0.1901	15.07	0.8407	98.6101		5.16174	2.43383	11.6012	50.2078	2.16002	4.09694	8.86319	0.192779	15.2824	0.85255	100
M178-35 549 cm	6.14	2.77	8.53	53.14	1.91	3.03	7.01	0.1873	16.97	0.8587	99.6873		6.15926	2.77869	8.55676	53.3067	1.91599	3.0395	7.03199	0.187888	17.0232	0.861394	100
	5.52	2.48	10.16	51.56	2.23	3.51	7.29	0.1849	15.75	0.788	98.6849		5.59356	2.51305	10.2954	52.2471	2.25972	3.55678	7.38715	0.187364	15.9599	0.798501	100
	5.42	2.57	10.14	51.44	2.13	3.65	7.66	0.2139	15.82	0.9163	99.0439		5.47232	2.59481	10.2379	51.9366	2.15056	3.68523	7.73394	0.215965	15.9727	0.925145	100
	6	3.22	9.27	53.51	2.07	2.83	5.79	0.2734	15.92	1.0025	98.8834		6.06775	3.25636	9.37468	54.1142	2.09337	2.86196	5.85538	0.276487	16.0998	1.01382	100
	6.57	3	8.94	52.13	2.16	3.22	6.25	0.2307	16.11	1.0126	98.6107		6.66256	3.04227	9.06595	52.8644	2.19043	3.26537	6.33805	0.23395	16.337	1.02687	100
	6.39	3.23	8.55	53.37	2.04	2.83	5.9	0.1046	16.2	1.1284	98.6146		6.47977	3.27538	8.67012	54.1198	2.06866	2.86976	5.98289	0.106069	16.4276	1.14425	100
	5.74	2.73	9.07	51.73	2.11	3.1	6.04	0.2795	15.98	1.1023	96.7795		5.93101	2.82085	9.37182	53.4514	2.18021	3.20316	6.24099	0.288801	16.5118	1.13898	100
	5.59	2.79	10.38	51.27	2.16	3.37	6.84	0.2164	16.03	1.0551	98.6464		5.6667	2.82828	10.5224	51.9735	2.18964	3.41624	6.93386	0.219369	16.25	1.06958	100
	5.5	2.74	9.74	51.22	2.01	3.75	7.21	0.2023	16	0.9343	98.3723		5.591	2.78534	9.90116	52.0675	2.04326	3.81205	7.3293	0.205647	16.2647	0.949759	100
	5.48	2.78	9.12	52.23	2.07	3.38	7.12	0.276	15.83	0.9206	98.286		5.57557	2.82848	9.27904	53.1408	2.1061	3.43894	7.24416	0.280813	16.1061	0.936654	100
	4.53	2.87	9.11	52.14	2.15	3.39	6.94	0.1866	15.91	0.9647	97.2266		4.65922	2.95187	9.36986	53.6273	2.21133	3.4867	7.13796	0.191923	16.3638	0.992218	100
	5.93	3.11	9.82	52.89	2.22	3.01	6.33	0.2982	16.06	1.1402	99.6682		5.94974	3.12035	9.85269	53.0661	2.22739	3.02002	6.35107	0.299193	16.1135	1.144	100
	5	4.01	9.04	53.93	2.07	2.86	5.64	0.1934	16.25	0.9762	98.9934		5.05084	4.05078	9.13192	54.4784	2.09105	2.88908	5.69735	0.195367	16.4152	0.986126	100
M178-35 579 cm	6.93	3.9	8.01	53.7	1.6482	2.35	4.98	0.1326	17.46	0.9479	99.1108	M1	6.99217	3.93499	8.08186	54.1818	1.66299	2.37108	5.02468	0.13379	17.6166	0.956404	100
	4.89	2.56	9.54	51.37	2.05	3.8	7.59	0.1832	16.2	0.8166	98.1832		4.98049	2.60737	9.71653	52.3206	2.08793	3.87032	7.73045	0.18659	16.4998	0.831711	100
	5.28	2.41	9.46	51.27	2.1	3.76	7.72	0.2155	16.2	0.8846	98.4155		5.36501	2.4488	9.61231	52.0955	2.13381	3.82054	7.84429	0.21897	16.4608	0.898842	100
	5.64	2.84	8.96	51.17	1.73	3.44	7.02	0.1891	17.17	0.8961	98.1591		5.74577	2.89326	9.12804	52.1297	1.76244	3.50451	7.15165	0.192646	17.492	0.912906	100
	4.95	2.51	9.61	51.48	2.08	3.7	7.8	0.1935	16.23	0.8168	98.5535		5.02265	2.54684	9.75105	52.2356	2.11053	3.75431	7.91448	0.19634	16.4682	0.828788	100
	5.7	2.85	9.08	51.57	1.76	3.31	6.88	0.1972	16.59	0.9525	97.9372		5.82006	2.91003	9.27125	52.6562	1.79707	3.37972	7.02491	0.201354	16.9394	0.972562	100
	5.11	2.15	9.74	51.58	2.14	3.71	6.32	0.209	16.16	0.8698	97.119		5.26159	2.21378	10.0289	53.1101	2.20348	3.82006	6.50748	0.2152	16.6394	0.895602	100
	5.29	2.47	10	51.1	2.09	3.64	7.66	0.2602	16.28	0.9251	98.7902		5.35478	2.50025	10.1225	51.7258	2.11559	3.68458	7.75381	0.263386	16.4794	0.936429	100
	5.68	2.65	9.44	51.19	2.15	3.62	7.46	0.2593	15.85	0.9518	98.2993		5.77827	2.69585	9.60332	52.0757	2.1872	3.68263	7.58907	0.263786	16.1242	0.968267	100
	5.75	2.92	10.99	51.15	2.33	3.64	7.67	0.1924	15.48	1.0567	100.122		5.74297	2.91643	10.9766	51.0875	2.32715	3.63555	7.66062	0.192165	15.4611	1.05541	100

## Sheet: Supplementary Table D
Supplementary Table D: Standard Measurements electron microprobe
Standard	Date	Na2O	K2O	FeOt	SiO2	TiO2	MgO	CaO	MnO	Al2O3	P2O5	Total
		[wt%]	[wt%]	[wt%]	[wt%]	[wt%]	[wt%]	[wt%]	[wt%]	[wt%]	[wt%]	[wt%]
Lipari	2022-10-04	3.82	5.2	1.72	76.12	0.1053	0.011	0.8128	0.0271	13.23	0.0014	90.3076
Lipari	2022-10-04	4.04	5.23	1.64	74.76	0.0787	0.0279	0.7398	0.0344	13.01	0.0229	88.6737
Lipari	2022-10-04	4	5.27	1.45	74.29	0.0836	0.0302	0.7728	0.0807	13.12	0.0229	88.4002
Lipari	2022-10-04	4.09	5.2	1.59	74.41	0.0935	0.0642	0.7437	0.0237	13.06	0.0368	88.4319
Lipari	2022-10-04	3.81	5.24	1.58	75.11	0.045	0.0449	0.751	0.0996	13.41	0.0334	89.4939
Lipari	2022-10-05	3.88	5.18	1.6	74.67	0.0804	0	0.7232	0.102	13.21	0.0341	88.8197
Lipari	2022-10-05	3.97	5.18	1.47	75.02	0.105	0.0243	0.7881	0.0624	13.3	0.0118	89.3116
Lipari	2022-10-05	3.76	5.2	1.48	74.56	0.0728	0.0368	0.7371	0	13.32	0	88.7267
Lipari	2022-10-05	4.06	5.23	1.8	74.91	0.0798	0.0082	0.7798	0.1277	13.23	0.0167	89.1522
Lipari	2022-10-05	4.86	5.11	1.41	73.76	0.0563	0.0222	0.8678	0.0715	14.41	0	89.1878
Lipari	2022-10-05	3.61	5.17	1.63	75	0.0706	0.0419	0.7538	0.0918	13.18	0	89.1381
Lipari	2022-10-05	3.83	5.23	1.83	73.36	0.1041	0.0295	0.7676	0.0379	13.07	0.0243	87.3934
Lipari	2022-10-05	4.13	5.12	1.78	75.3	0.0803	0.0066	0.7519	0.0785	13.19	0	89.4073
Lipari	2022-10-05	3.55	5.12	1.52	70.47	0.0749	0	0.7821	0.0251	13.06	0	84.4121
Lipari	2022-10-05	3.95	5.21	1.46	74.37	0.0914	0.0251	0.7739	0.1111	13.1	0.0021	88.4736
Lipari	2022-10-06	3.83	5.13	1.77	74.6	0.0836	0.0479	0.7701	0.0132	13.03	0	88.5448
Lipari	2022-10-06	3.86	5.15	1.69	74.29	0.0932	0.0501	0.779	0.0169	13.31	0	88.5392
Lipari	2022-10-06	3.94	5.2	1.7	74.62	0.0718	0.0185	0.7469	0.0537	13.07	0	88.5809
Lipari	2022-10-06	3.76	5.16	1.67	74.59	0.0962	0.0354	0.7704	0.0895	12.93	0.0209	88.5324
Lipari	2022-10-06	3.67	5.2	1.42	75.02	0.0792	0.0258	0.7431	0.1142	13.11	0.0258	89.1181
Lipari	2022-10-06	3.88	5.17	1.86	73.9	0.0769	0.0281	0.7825	0.1021	12.91	0.0202	87.8198
Lipari	2022-10-06	3.93	5.23	1.55	74.48	0.0718	0.0428	0.7921	0.0925	13.27	0.0056	88.7548
Lipari	2022-10-06	3.68	5.19	1.54	74.06	0.1058	0.0081	0.7771	0.0323	13.15	0	88.1333
Lipari	2022-10-06	4.7	5.42	1.32	72.98	0.0526	0.0126	0.7662	0.0743	14.56	0	88.4457
Lipari	2022-10-06	4.05	5.19	1.75	74.46	0.0725	0.0067	0.7482	0.1573	13.29	0.0432	88.7779
Lipari	2022-10-07	3.55	5.18	1.74	74.1	0.0626	0.0405	0.7941	0.0082	13.26	0	88.2654
Lipari	2022-10-07	3.49	5.18	1.69	74.9	0.1123	0.0375	0.7403	0.0155	13.03	0	88.8356
Lipari	2022-10-07	3.78	5.23	1.54	74.65	0.0732	0.0273	0.7441	0.1299	13.18	0	88.8045
Lipari	2022-10-07	4	5.21	1.76	74.7	0.0713	0.0244	0.7404	0.107	13.25	0.0222	88.9153
Lipari	2022-10-07	3.79	5.17	1.48	73.89	0.0895	0.0469	0.7645	0.0489	12.95	0.0104	87.8002
Lipari	2022-10-07	4.06	5.1	1.66	74.19	0.0881	0.0254	0.7788	0.0543	13.09	0	88.2266
Lipari	2022-10-07	3.79	5.15	1.49	74.38	0.0788	0.0152	0.7629	0.1194	13.23	0	88.5863
Lipari	2022-10-07	3.39	5.3	1.44	73.96	0.0734	0.0397	0.7326	0.0668	12.92	0	87.7925
Lipari	2022-10-07	3.54	5.18	1.55	74.4	0.0626	0.0731	0.7539	0.0377	12.88	0.0245	88.2318
Lipari	2022-10-07	3.77	5.23	1.55	74.41	0.0994	0.0572	0.7562	0.1116	12.78	0	88.2144
Lipari	2022-10-08	3.03	5.23	1.62	74.11	0.1019	0.0374	0.7466	0.0176	12.98	0	87.9935
Lipari	2022-10-08	3.66	5.13	1.53	74.09	0.1095	0.0238	0.7245	0.0577	13	0	88.0055
Lipari	2022-10-08	4.21	5.14	1.55	73.91	0.1035	0.04	0.7705	0.0691	12.88	0.0432	87.8163
Lipari	2022-10-08	3.56	5.28	1.56	74.19	0.1022	0.0173	0.7532	0.0617	12.92	0	88.0444
Lipari	2022-10-10	3.81	5.17	1.65	73.81	0.07	0.059	0.7567	0.0112	13.15	0.0076	87.8645
Lipari	2022-10-10	3.9	5.26	1.45	74.27	0.0743	0.0359	0.766	0.0476	13.27	0.018	88.4818
Lipari	2022-10-10	3.62	5.18	1.66	73.93	0.095	0.013	0.7556	0.0746	13.25	0	88.1182
Lipari	2022-10-10	3.88	5.24	1.43	74.07	0.0383	0.0396	0.7712	0.0008	13.08	0.025	88.0249
Lipari	2022-10-10	3.11	5.25	1.89	74.91	0.0963	0.0194	0.7266	0.0591	13.2	0.0257	89.0371
Lipari	2022-10-10	3.84	5.23	1.73	74.8	0.0725	0.0072	0.7736	0.1126	13.56	0.039	89.3649
Lipari	2022-10-10	3.62	5.18	1.57	74.3	0.1108	0.0202	0.7484	0.0386	13.21	0.0299	88.4579
Lipari	2022-10-10	4.01	5.24	1.39	74.46	0.0976	0.0115	0.7252	0.0424	13.1	0	88.4367
Lipari	2022-10-10	3.6	5.13	1.68	74.68	0.0635	0	0.7029	0.1009	13.29	0.0222	88.8595
Lipari	2022-10-10	3.78	5.18	1.75	73.95	0.0632	0.0599	0.7675	0.1017	13.04	0	87.9823
Lipari	2022-10-12	3.86	5.21	1.69	74.34	0.0504	0	0.7165	0.0325	13.13	0.0104	88.2798
Lipari	2022-10-12	3.92	5.16	1.65	74.1	0.079	0.0181	0.7824	0.0784	13.05	0.0313	88.1392
Lipari	2022-10-12	3.23	5.18	1.61	74.97	0.0678	0	0.7504	0.0522	13.08	0	88.9204
Lipari	2022-10-12	4.02	5.19	1.71	74.69	0.0616	0.0144	0.7728	0.0627	13.18	0.0007	88.7822
Lipari	2022-10-12	4.04	5.16	1.8	74.69	0.0701	0.0216	0.7803	0.0904	13.17	0	88.8224
Lipari	2022-10-12	3.48	5.13	1.72	74.97	0.08	0	0.7381	0.0698	13.44	0	89.2979
Lipari	2022-11-01	4.14	5.22	1.8	74.23	0.1125	0.0493	0.7561	0.0982	13.28	0	88.5261
Lipari	2022-11-01	3.83	5.29	1.51	73.91	0.0626	0.0628	0.7771	0.1137	13.24	0	88.1662
Lipari	2022-11-01	3.91	5.15	1.62	74.8	0.0769	0.008	0.7633	0.0406	13.24	0	88.9288
Lipari	2022-11-01	3.03	5.2	1.36	75.35	0.0986	0.0208	0.7718	0.0934	13.13	0.0035	89.4681
Lipari	2022-11-17	3.21	5.27	1.63	75.6	0.0768	0.013	0.7394	0.0803	13.24	0.014	89.7635
Lipari	2022-11-17	4	5.27	1.52	73.96	0.0903	0	0.7623	0	12.94	0	87.7526
Lipari	2022-11-17	3.86	5.3	1.67	74.72	0.0716	0.0361	0.7396	0.0916	13.24	0.0181	88.917
Lipari	2022-11-17	3.99	5.24	1.49	74.78	0.1001	0.0512	0.8002	0.0616	13.17	0.0361	88.9992
Lipari	2022-11-17	2.86	5.24	1.45	72.9	0.0979	0	0.7389	0	13.05	0.0187	86.8055
Lipari	2022-11-17	3.56	5.28	1.82	72.88	0.0789	0.005	0.7155	0.0409	12.98	0	86.7003
Lipari	2022-11-17	4	5.26	1.54	74.74	0.0585	0.0433	0.7559	0.0961	13.24	0.0735	89.0073
Lipari	2022-11-17	3.31	5.28	1.5	74.78	0.0864	0.0072	0.7669	0.0734	13.26	0	88.9739
Lipari	22.11.2022	3.88	5.18	1.62	74.39	0.081	0.0521	0.804	0.1115	13.16	0.0244	88.623
Lipari	2022-11-22	3.22	5.17	1.68	75.17	0.0789	0.0187	0.7993	0.0575	13.21	0	89.3344
Lipari	2022-11-22	3.65	5.23	1.65	74.09	0.0417	0.0464	0.7397	0.1386	13.16	0.0223	88.2387
Lipari	2022-11-22	3.72	5.19	1.59	74.48	0.1049	0.0702	0.7618	0.0434	13.41	0.0349	88.9052
Lipari	2022-11-23	3.15	5.23	1.74	75.04	0.0692	0.0238	0.7461	0.0567	13.21	0.0286	89.1744
Lipari	2022-11-23	3.78	5.21	1.45	74.08	0.0939	0.0311	0.7671	0.1303	13.17	0	88.2724
Lipari	2022-11-23	3.4	5.24	1.73	74.28	0.0854	0.0267	0.7968	0.0249	13.11	0.0404	88.3642
Lipari	2022-11-23	3.68	5.16	1.91	74.15	0.0821	0.0478	0.7372	0.061	13.22	0.0306	88.3287
Lipari	2022-11-23	3.73	5.17	1.36	74.97	0.0833	0.0223	0.7849	0	13.12	0	88.9805
Lipari	2022-11-23	3.54	5.3	1.73	73.97	0.0659	0.0217	0.7659	0	13.25	0.0265	88.1
Lipari	2023-03-17	0.101	13.12	75.54	4.19	5.11	0.009	0.7857	0	1.63	0.0836	100.569
Lipari	2023-03-17	0.0051	13.39	74.46	3.6	5.33	0.022	0.714	0.0576	1.61	0.0834	99.2721
Lipari	2023-03-18	0.1446	13.24	74.77	4.04	5.1	0.0331	0.7637	0.0201	1.8	0.0887	100
Lipari	2023-03-18	0.0014	13.2	75.38	4.33	5.28	0	0.6069	0.0014	1.67	0.0419	100.512
Lipari	2023-03-18	0.1078	13.23	71.78	4.08	5.18	0.0338	0.754	0.0248	1.65	0.0483	96.8888
Lipari	2023-03-18	0.0385	13.17	73.2	4.15	5.16	0.0441	0.7481	0	1.79	0.0815	98.3822
Lipari	2023-03-18	0.1142	13.35	73.78	4.11	5.16	0	0.7427	0	1.7	0.0497	99.0066
Lipari	2023-03-18	0.0429	13.1	74.02	4.13	5.25	0.0069	0.7131	0	1.67	0.0966	99.0295
Lipari	2023-03-18	0.0358	13.06	71.43	4.28	5.08	0	0.7555	0.0124	1.41	0.0501	96.1138
Lipari	2023-03-18	0	13.28	73.76	4	5.2	0.0233	0.7772	0.02	1.64	0.0697	98.7703
Lipari	2023-03-18	0.0415	13.17	74.44	4.11	5.19	0.0481	0.7505	0.0276	1.68	0.0677	99.5255
Lipari	2023-03-18	0	13.11	73.59	4.2	5.28	0.0419	0.7519	0	1.59	0.1042	98.6681
Lipari	2023-03-18	0.0675	13.2	74.46	4.19	5.18	0.0171	0.7545	0.022	1.53	0.0357	99.4568
Lipari	2023-03-18	0.0177	13.21	74.43	4.37	5.14	0.0646	0.7116	0.0007	1.82	0.0908	99.8555
Lipari	2023-03-20	0.1075	13.54	74.32	4.14	5.09	0.0028	0.7238	0.0758	1.56	0	99.56
Lipari	2023-03-20	0.1001	13.37	74.25	4.07	5.09	0	0.7473	0.075	1.43	0.0104	99.1428
Lipari	2023-03-20	0.0701	13.09	73.31	3.96	5.11	0.0041	0.7524	0.056	1.65	0.0187	98.0213
Lipari	2023-03-20	0.1403	13.2	74.25	4.08	5.12	0.0517	0.7385	0.0654	1.54	0.0249	99.2108
Lipari	2023-03-20	0.0749	13.34	73.94	4.44	5.14	0.016	0.7668	0.0834	1.7	0.0042	99.5054
Lipari	2023-03-20	0.0989	13.53	74.22	4.44	5.11	0	0.7209	0.082	1.72	0.0299	99.9518
Lipari	2023-03-20	0.071	13.17	74.45	4.12	5.11	0.0589	0.731	0.064	1.68	0.0125	99.4675
Lipari	2023-03-20	0.0278	13.13	74.24	4.08	5.06	0	0.7558	0.1104	1.71	0.0271	99.1411
Lipari	2023-03-21	0.0543	12.94	73.48	3.92	4.98	0.107	0.9425	0.097	2.68	0	99.2009
Lipari	2023-03-21	0.0404	13.25	74.38	4.15	5.12	0.009	0.7591	0.0863	1.65	0.0007	99.4456
Lipari	2023-03-21	0.1045	12.93	74.72	3.92	5.18	0	0.7448	0.1066	1.64	0	99.3459
Lipari	2023-03-21	0.0959	13.01	74.07	4.03	5.04	0.0414	0.7324	0.094	1.6	0.0042	98.718
Lipari	2023-03-21	0.0707	13.02	74.81	4.27	5.15	0.0118	0.7362	0.0533	1.73	0	99.8521
Lipari	2023-03-21	0.0317	13.02	74.83	3.94	5.12	0	0.7224	0.0887	1.6	0	99.3529
Lipari	2023-03-21	0.0837	12.8	74.41	3.92	5.16	0.0007	0.6766	0.0791	1.68	0.0229	98.8331
Lipari	2023-03-22	0.0221	12.88	73.89	3.84	5.06	0	0.7701	0.074	1.55	0.0425	98.1288
Lipari	2023-03-22	0.0206	12.91	74.48	3.86	5.12	0.0076	0.7652	0.0573	1.48	0.016	98.7168
Lipari	2023-03-22	0.0365	12.98	73.93	3.84	5.03	0.0269	0.7392	0.0868	1.6	0	98.2694
Lipari	2023-03-22	0.0161	12.95	74.33	4.29	5.06	0.0236	0.7585	0.0617	1.66	0.0272	99.1771
Lipari	2023-03-22	0.0318	13.17	74.84	4.14	5.05	0.0708	0.7283	0.0684	1.51	0	99.6093
Lipari	2023-03-22	0.0956	12.76	73.39	3.84	5.08	0.0422	0.773	0.0758	1.8	0	97.8567
Lipari	2023-03-22	0.1165	13.02	74.12	3.96	5.05	0.0007	0.7062	0.1096	1.45	0	98.5331
Lipari	2023-03-22	0.0808	12.94	74.06	3.99	5.09	0.0083	0.7806	0.0879	1.32	0	98.3577
Lipari	2023-03-22	0.0891	13.05	74.62	4.26	5.23	0.0437	0.7353	0.0926	1.54	0.0146	99.6754
Lipari	2024-03-11	0.0529	12.98	74.43	3.81	5.11	0.0427	0.7814	0.1007	1.38	0	98.6878
Lipari	2024-03-11	0.0375	12.78	74.35	4.02	5.09	0.1147	0.7323	0.0807	1.54	0	98.7453
Lipari	2024-03-11	0.1742	12.89	74.06	3.48	5.06	0	0.7376	0.0676	1.45	0	97.9194
Lipari	2024-03-11	0.0896	13.11	73.42	3.71	5.02	0.0465	0.7894	0.0469	1.2816	0.0038	97.5178
Lipari	2024-03-11	0	12.91	72.64	4	5.06	0.0197	0.7539	0.0593	1.69	0	97.133
Lipari	2024-03-11	0.0534	12.95	73.38	3.9	5.05	0.0118	0.7549	0.0974	1.51	0.0452	97.7527
Lipari	2024-03-11	0.0373	12.85	72.75	3.97	5.08	0.0447	0.7751	0.1085	1.41	0	97.0257
Lipari	2024-03-11	0.1413	12.83	72.85	3.96	5.08	0.0651	0.7609	0.0452	1.58	0.0054	97.318
Lipari	2024-04-26	0	12.95	73.87	3.68	5.11	0.0276	0.7526	0.0878	1.57	0.0322	98.0803
Lipari	2024-04-26	0.0968	12.88	73.17	4.07	5.03	0.0482	0.753	0.0604	1.53	0.01	97.6485
Lipari	2024-04-26	0.1233	13.03	74.81	3.96	5	0	0.7544	0.0677	1.54	0.0146	99.3001
Lipari	2024-04-26	0.0266	12.91	75.08	3.74	5.06	0.0376	0.7244	0.0786	1.51	0	99.1673
VGA99_	2022-10-04	2.87	0.7896	13.36	51.06	4.21	5.26	9.51	0.2188	12.58	0.4292	83.268
VGA99_	2022-10-04	2.69	0.8257	13.64	51.17	4.17	5.3	9.49	0.2248	12.18	0.4253	82.9601
VGA99_	2022-10-04	2.7	0.8516	13.71	50.63	4.09	5.2	9.43	0.211	12.32	0.4149	82.2959
VGA99_	2022-10-04	3.06	0.8017	13.8	51.16	4.18	5.32	9.35	0.2224	12.59	0.4967	83.3191
VGA99_	2022-10-04	2.59	0.8575	13.39	51.05	4.1	5.37	9.43	0.1496	12.3	0.4169	82.8165
VGA99_	2022-10-05	2.83	0.8612	12.64	50.72	4.04	5.27	9.41	0.1487	12.32	0.3835	82.2922
VGA99_	2022-10-05	2.59	0.8401	13.34	51.16	4.14	5.14	9.59	0.2254	12.27	0.4277	82.9531
VGA99_	2022-10-05	2.86	0.8285	13.83	51.22	4.13	5.34	9.55	0.2134	12.56	0.5079	83.5213
VGA99_	2022-10-05	2.73	0.8199	13.35	52.13	4.16	5.17	9.48	0.1902	12.69	0.3075	84.1277
VGA99_	2022-10-05	2.55	0.8204	13.53	51.49	4.13	5.41	9.57	0.1147	12.43	0.4538	83.5985
VGA99_	2022-10-05	2.74	0.8524	13.62	49.69	4.1	5.31	9.39	0.1683	12.43	0.3418	81.4301
VGA99_	2022-10-05	2.7	0.829	13.7	50.87	4.1	5.1	9.41	0.2108	12.41	0.4708	82.5716
VGA99_	2022-10-05	2.9	0.8575	13.68	50.93	4.17	5.22	9.43	0.2837	12.55	0.3585	82.9422
VGA99_	2022-10-05	2.72	0.8205	13.67	50.43	4.07	5.28	9.43	0.2309	12.46	0.4218	82.3227
VGA99_	2022-10-05	2.78	0.8085	13.39	48.58	4.12	5.28	9.57	0.2036	12.4	0.3452	80.4988
VGA99_	2022-10-06	2.65	0.8327	12.79	50.66	4.13	5.12	9.37	0.2943	12.49	0.4512	82.5155
VGA99_	2022-10-06	2.67	0.8597	13.05	50.92	4.14	5.1	9.41	0.1607	12.43	0.4711	82.6318
VGA99_	2022-10-06	2.66	0.8334	13.87	50.92	4.13	5.24	9.52	0.2775	12.6	0.3781	83.0656
VGA99_	2022-10-06	2.69	0.8262	13.36	51.36	4.09	5.19	9.39	0.2202	12.34	0.4221	83.0123
VGA99_	2022-10-06	2.66	0.8179	13.49	50.8	4.09	5.31	9.35	0.1796	12.64	0.4347	82.8043
VGA99_	2022-10-06	2.54	0.8395	13.2	50.91	4.11	5.32	9.54	0.2647	12.61	0.403	83.1577
VGA99_	2022-10-06	2.9	0.8383	13.11	51.25	4.11	5.36	9.53	0.1904	12.47	0.3634	83.2738
VGA99_	2022-10-06	2.66	0.8563	13.69	51.21	4.13	5.34	9.52	0.2126	12.37	0.3968	83.1794
VGA99_	2022-10-06	2.7	0.8332	13.5	51.06	4.17	5.26	9.37	0.265	12.37	0.4033	82.8983
VGA99_	2022-10-06	2.45	0.8032	13.22	50.96	4.15	5.3	9.43	0.2419	12.64	0.3981	83.12
VGA99_	2022-10-07	2.7	0.8447	13.12	50.59	4.12	5.16	9.5	0.2198	12.37	0.4548	82.4146
VGA99_	2022-10-07	2.98	0.8366	13.4	51.16	4.11	5.25	9.53	0.2157	12.23	0.4539	82.9496
VGA99_	2022-10-07	2.51	0.868	13.59	50.87	4.17	5.19	9.45	0.2053	12.52	0.3302	82.7355
VGA99_	2022-10-07	2.66	0.8551	13.75	51.18	4.11	5.32	9.4	0.1912	12.46	0.4441	83.1053
VGA99_	2022-10-07	2.72	0.83	13.62	50.51	4.11	5.15	9.36	0.1892	12.21	0.4361	81.9653
VGA99_	2022-10-07	2.72	0.8186	13.51	50.65	4.05	5.3	9.28	0.1351	12.19	0.3803	81.9854
VGA99_	2022-10-07	2.86	0.8081	13.33	50.61	4.03	5.02	9.3	0.2017	12.35	0.4106	81.9223
VGA99_	2022-10-07	2.86	0.8284	13.76	50.66	4.07	5.14	9.4	0.154	12.35	0.3444	82.1184
VGA99_	2022-10-08	2.66	0.8443	13.32	50.52	4.04	5.2	9.33	0.1726	12.34	0.4338	82.0364
VGA99_	2022-10-08	2.62	0.8305	13.19	51.04	4.06	5.08	9.5	0.243	12.24	0.4486	82.6116
VGA99_	2022-10-08	2.62	0.8277	14	50.83	4.15	5.22	9.33	0.2614	12.33	0.4161	82.5375
VGA99_	2022-10-08	2.78	0.8282	13.57	50.75	4.02	5.23	9.49	0.1542	12.24	0.3506	82.2348
VGA99_	2022-10-10	2.75	0.8303	13.57	50.52	4.06	5.05	9.23	0.2235	12.59	0.3703	82.0438
VGA99_	2022-10-10	2.55	0.8037	13.7	50.68	4.08	5.12	9.41	0.2081	12.4	0.4015	82.2996
VGA99_	2022-10-10	2.84	0.8353	13.95	50.55	4.07	5.14	9.3	0.166	12.77	0.4269	82.4229
VGA99_	2022-10-10	2.84	0.8289	13.5	50.62	4.04	4.9	9.37	0.3107	12.44	0.4061	82.0868
VGA99_	2022-10-10	2.69	0.8318	13.76	51.05	4.07	5.16	9.4	0.1298	12.59	0.4233	82.8231
VGA99_	2022-10-10	2.5	0.8263	14.11	50.97	4.05	5.09	9.36	0.2007	12.56	0.405	82.6357
VGA99_	2022-10-10	2.58	0.8141	13.64	50.98	4.14	5.1	9.4	0.279	12.67	0.4113	82.9803
VGA99_	2022-10-10	2.83	0.8417	13.31	51.24	4.02	5.15	9.51	0.1889	12.5	0.4092	83.0181
VGA99_	2022-10-10	2.84	0.8309	13.84	50.97	4.02	5.19	9.35	0.1865	12.59	0.4359	82.7424
VGA99_	2022-10-10	2.57	0.8358	12.94	50.9	4.12	5.12	9.42	0.2078	12.57	0.4285	82.7663
VGA99_	2022-10-12	2.68	0.8201	13.82	50.48	4.07	5.18	9.23	0.2025	12.41	0.3901	81.9626
VGA99_	2022-10-12	2.64	0.7934	13.65	50.97	4.11	5.18	9.42	0.1443	12.41	0.4084	82.6427
VGA99_	2022-10-12	2.6	0.8266	13.33	51.02	4.07	5.11	9.47	0.1991	12.54	0.3502	82.7593
VGA99_	2022-10-12	2.89	0.8615	13.36	50.72	4.06	5.14	9.36	0.1678	12.53	0.4873	82.4651
VGA99_	2022-10-12	2.71	0.8241	13.45	50.77	4.11	5.11	9.39	0.2061	12.36	0.4406	82.3867
VGA99_	2022-10-12	2.61	0.8389	13.52	51.1	4.14	5.12	9.36	0.2436	12.48	0.3383	82.7819
VGA99_	2022-11-01	2.7	0.8733	13.16	50.38	4.08	5.03	9.23	0.2546	12.54	0.4495	81.9641
VGA99_	2022-11-01	2.7	0.8635	13.26	50.9	4.12	5.07	9.36	0.295	12.34	0.3284	82.4134
VGA99_	2022-11-01	2.96	0.8191	13.86	50.67	4.04	5.36	9.27	0.1905	12.38	0.441	82.3515
VGA99_	2022-11-01	2.75	0.8359	13.17	51.24	4.12	5.06	9.24	0.2668	12.34	0.3572	82.624
VGA99_	2022-11-17	2.83	0.8399	13.17	50.94	4.24	5.33	9.46	0.1998	12.44	0.3961	83.0059
VGA99_	2022-11-17	2.8	0.8768	12.92	51.31	4.08	5.18	9.41	0.2575	12.22	0.4327	82.8902
VGA99_	2022-11-17	3	0.8437	13.11	50.98	4.08	5.18	9.47	0.215	12.51	0.3696	82.8046
VGA99_	2022-11-17	2.89	0.819	13.07	50.87	4.08	5.14	9.4	0.2903	12.32	0.3786	82.4789
VGA99_	2022-11-17	2.8	0.844	13.35	50.15	4.06	5.1	9.42	0.1523	12.33	0.4408	81.6531
VGA99_	2022-11-17	3	0.882	13.48	51.31	4.1	5.27	9.36	0.2327	12.52	0.4292	83.2219
VGA99_	2022-11-17	2.51	0.8736	13.23	51.02	4.14	5.11	9.46	0.1536	12.42	0.4586	82.7622
VGA99_	2022-11-17	2.89	0.8519	13.56	51.26	4.15	5.03	9.43	0.1414	12.44	0.3776	82.829
VGA99_	2022-11-22	2.87	0.8211	12.97	51.19	4.12	5.23	9.41	0.1143	12.67	0.3729	83.1072
VGA99_	2022-11-22	2.73	0.8224	13.09	50.98	4.04	5.2	9.34	0.164	12.73	0.3805	82.8345
VGA99_	2022-11-22	2.7	0.8284	13.47	51.2	4.05	5.15	9.38	0.2261	12.36	0.3686	82.7347
VGA99_	2022-11-22	2.49	0.8622	13.01	50.87	4.08	5.06	9.53	0.2197	12.63	0.4239	82.8136
VGA99_	2022-11-22	2.69	0.8699	13.18	50.94	4.09	5.01	9.46	0.1437	12.67	0.3758	82.6895
VGA99_	2022-11-23	2.65	0.843	13.29	51.06	4.04	5.17	9.43	0.1568	12.41	0.4444	82.7112
VGA99_	2022-11-23	2.55	0.8327	13.42	50.91	4.09	5.25	9.48	0.2141	12.37	0.4407	82.7548
VGA99_	2022-11-23	2.54	0.8114	12.88	50.7	4.11	5.18	9.33	0.1996	12.57	0.3505	82.4401
VGA99_	2022-11-23	2.95	0.8235	12.99	51.61	4.1	5.25	9.43	0.1008	12.43	0.4145	83.3353
VGA99_	2022-11-23	2.77	0.8443	13.32	50.88	4.07	5.32	9.42	0.1685	12.6	0.3284	82.7869
VGA99_	2022-11-23	2.78	0.8085	13.35	50.53	4.12	5.19	9.48	0.227	12.51	0.3181	82.3751
VGA99_	2022-11-23	2.87	0.8281	13.28	50.45	4.12	5.11	9.43	0.1827	12.44	0.4606	82.1933
VGA99_	2023-03-17	0.2513	12.35	50.43	2.52	0.8095	5.05	9.24	0.3568	13.98	4.06	99.0476
VGA99_	2023-03-17	0.2439	12.47	51.15	2.75	0.8291	4.96	9.3	0.394	13.57	4.17	99.8371
VGA99_	2023-03-18	0.2002	12.53	50.79	2.62	0.807	4.93	9.31	0.3582	13.6	4.08	99.2255
VGA99_	2023-03-18	0.141	12.86	51.09	2.74	0.8255	5.15	9.42	0.3453	14.25	4.19	101.012
VGA99_	2023-03-18	0.2412	12.54	50.87	2.84	0.8459	4.98	9.4	0.3055	13.66	4.17	99.8527
VGA99_	2023-03-18	0.1577	12.42	50.33	2.8	0.8198	5.08	9.34	0.4103	13.76	4.2	99.3178
VGA99_	2023-03-18	0.1459	12.58	50.5	2.68	0.8035	5.02	9.39	0.3699	13.48	4.15	99.1194
VGA99_	2023-03-18	0.1441	12.53	50.32	2.9	0.8062	5.15	9.4	0.4243	13.95	4.22	99.8447
VGA99_	2023-03-18	0.192	12.41	50.15	2.55	0.817	4.89	9.31	0.3438	13.28	4.12	98.0629
VGA99_	2023-03-18	0.2803	12.38	49.98	2.89	0.815	5.09	9.38	0.3904	14.21	4.1	99.5158
VGA99_	2023-03-18	0.2256	12.31	50.52	2.71	0.7999	5.07	9.36	0.3695	14.19	4.13	99.6851
VGA99_	2023-03-18	0.1601	12.32	50.35	2.63	0.8559	4.98	9.43	0.3704	14.21	4.19	99.4965
VGA99_	2023-03-18	0.2064	12.36	50.9	2.82	0.808	5.17	9.43	0.4044	13.82	4.16	100.079
VGA99_	2023-03-18	0.227	12.44	50.86	2.49	0.837	5	9.26	0.4038	13.97	4.23	99.7179
VGA99_	2023-03-20	0.2387	12.5	50.96	2.6	0.8162	4.97	9.11	4.13	14.11	0.386	99.821
VGA99_	2023-03-20	0.2473	12.52	51.24	2.82	0.8042	5.05	9.26	4.07	14.47	0.3468	100.828
VGA99_	2023-03-20	0.1743	12.55	50.08	2.54	0.8154	5.11	9.25	4.04	14.04	0.3689	98.9687
VGA99_	2023-03-20	0.1411	12.31	50.76	2.71	0.8232	5.08	9.32	4.05	13.17	0.4287	98.7931
VGA99_	2023-03-20	0.195	12.67	51.1	2.87	0.779	4.97	9.16	4.11	13.53	0.3178	99.7019
VGA99_	2023-03-20	0.1909	12.6	50.59	2.72	0.836	4.92	9.29	4.07	13.56	0.4169	99.1939
VGA99_	2023-03-20	0.219	12.84	50.88	2.54	0.7974	4.98	9.39	4.04	13.84	0.3748	99.9013
VGA99_	2023-03-20	0.1437	12.26	51.13	2.48	0.8288	4.93	9.25	4.06	13.05	0.3801	98.5126
VGA99_	2023-03-21	0.2365	12.38	51.27	2.74	0.7349	5.04	9.52	4.16	13.04	0.4135	99.535
VGA99_	2023-03-21	0.2241	12.48	51.05	2.62	0.8176	5.05	9.33	4.07	13.31	0.3773	99.3291
VGA99_	2023-03-21	0.1786	12.33	50.76	2.65	0.8137	5.01	9.23	4.05	13.94	0.4527	99.4151
VGA99_	2023-03-21	0.2692	12.37	51.04	2.66	0.7981	5.07	9.23	4.13	13.45	0.3606	99.378
VGA99_	2023-03-21	0.1876	12.49	50.92	2.61	0.8392	5.06	9.29	4.04	13.63	0.3907	99.4576
VGA99_	2023-03-21	0.2583	12.3	50.67	2.82	0.8314	5	9.26	4.03	13.71	0.3854	99.2652
VGA99_	2023-03-22	0.2737	12.15	50.71	2.58	0.8149	5.05	9.29	4.07	13.32	0.3736	98.6323
VGA99_	2023-03-22	0.1884	12.37	50.75	2.82	0.8153	5.08	9.24	4.05	13.2	0.4117	98.9255
VGA99_	2023-03-22	0.1929	12.23	50.72	2.6	0.8003	4.91	9.1	4.08	13.06	0.4143	98.1076
VGA99_	2023-03-22	0.1757	12.18	50.62	2.83	0.834	4.94	9.34	4.08	13.65	0.4229	99.0727
VGA99_	2023-03-22	0.1867	12.17	51.28	2.65	0.7908	5.19	9.34	4.1	13.42	0.3546	99.4821
VGA99_	2023-03-22	0.1461	12.1	50.5	2.76	0.8024	5.04	9.23	4.06	12.47	0.4337	97.5423
VGA99_	2023-03-22	0.1982	12.12	50.65	2.4	0.8153	4.9	9.2	4.09	13.44	0.4409	98.2544
VGA99_	2023-03-22	0.2459	12.12	50.52	2.71	0.8072	4.99	9.23	4.04	13.11	0.4406	98.2138
VGA99_	2023-03-22	0.2299	12.37	50.7	2.72	0.8262	4.91	9.29	4.11	13.6	0.3796	99.1357
VGA99_	2023-03-22	0.1879	12.52	50.68	2.66	0.8535	5.11	9.25	4.04	13.86	0.4069	99.5683
VGA99_	2023-03-22	0.2563	12.14	51.13	2.53	0.8043	5.05	9.21	4.12	13.56	0.4081	99.2088
VGA99_	2024-03-11	0.1456	11.97	50.94	2.92	0.8255	5.11	9.2	4.04	13.31	0.3203	98.7814
VGA99_	2024-03-11	0.1488	12.25	50.66	2.97	0.8173	5.04	9.22	4.03	13.22	0.3585	98.7147
VGA99_	2024-03-11	0.1146	12.14	50.26	2.89	0.8422	4.88	9.24	4.01	13.12	0.3662	97.8631
VGA99_	2024-03-11	0.244	12.44	50.74	3	0.8488	5.13	9.16	4.05	12.6	0.4492	98.6621
VGA99_	2024-03-11	0.2406	12.25	49.83	2.95	0.8343	5.07	9.18	4.02	13.5	0.4228	98.2978
VGA99_	2024-03-11	0.213	12.21	50.01	2.89	0.836	5.05	9.21	4	13.18	0.3997	97.9987
VGA99_	2024-03-11	0.2471	12.36	50.28	2.78	0.84	5.02	9.3	4.08	13.44	0.454	98.8012
VGA99_	2024-03-11	0.3015	12.22	50.64	2.94	0.8279	5.01	9.3	4	12.87	0.4445	98.554
VGA99_	2024-03-11	0.2773	12.16	50.33	2.52	0.8337	5.07	9.34	4.07	13.41	0.4178	98.4289
VGA99_	2024-03-11	0.201	12.12	50.88	2.72	0.8132	5.18	9.28	4.14	13.15	0.3492	98.8335
VGA99_	2024-04-26	0.1242	11.74	50.69	2.84	0.8216	5.15	9.09	4.03	13.3	0.2937	98.0796
VGA99_	2024-04-26	0.0849	12.62	51.63	2.87	0.8231	5.17	9.18	4.07	12.89	0.347	99.6851
VGA99_	2024-04-26	0.2483	12.32	51.18	2.87	0.8285	5.11	9.18	4.09	12.72	0.401	98.9479
VGA99_	2024-04-26	0.1815	12.58	51.11	2.74	0.8444	5.18	9.31	4.11	12.9	0.4441	99.4001

## Sheet: Supplementary Table E
Supplementary Table E: Gravity core (GC) locations and number of samples taken during expedition M178
Station No.	Position	Water depth (m.b.s.l.)	Number of Samples
M178-35-1	N 37° 41.747 E 15° 22.994	1473	26
M178-29-1	N 37° 26.349 E 15° 25.982	1985	22
M178-18-1	N 37° 39.348 E 15° 16.578	722	7
M178-15-1	N 37° 40.411 E 15° 17.885	625	6
M178-14-1	N 37° 40.221 E 15° 21.500	1588	18
M178-12-2	N 37° 39.865 E 15° 21.713	1582	11
M178-11-1	N 37° 40.385 E 15° 17.781	637	5
M178-10-1	N 37° 40.311 E 15° 17.399	643	4
m.b.s.l. = meters below sea level

## Sheet: Supplementary Table F
Supplementary Table F: C14 age dating results. Analyse obtained at Leibniz-Labor für Altersbestimmung und Isotopenforschung Kiel/Germany.
Last Name	Sample ID	Sample Customer Identification	Extraction Fraction	Pretreatment Yield	d13C / ‰	error d13C / ‰	Weight / mg	Cweight / mg	%C	pMC	pMCError	Age BP	AgeError	Wheel ID
Kolling	57020	M178-14-1, 330 cm	Mussell / Carbonate	93,60%	1.3	0.3	10.01	1,14	11,39%	48.71	0.19	5775	35	1851

## Sheet: Supplementary Table G
Supplementary Table G: Sedimentation rates of the cores
Core	Interval [cm ]	Time marker	Age [yr BP]	diff [cm]	diff [yr]	rate [cm/kyr BP]
M178-10
	0-305	FS	3930	305	3930	77.6081
M178-11
	0-275	FS	3930	275	3930	69.9746
M178-12
	0-209.5	TV	5340	209.5	5340	39.2322
M178-14
	0-66	FV	1260	66	1260	52.381
	66-181	FF	2044	115	784	146.684
	181-320	TV	5340	139	3296	42.1723
M178-15
	0-348	S1 start	7700	348	7700	45.1948
	348-585	S1 end	10000	237	2300	103.043
	585-630	M1	12240	45	2240	20.0893
M178-18
	0-114.5	FV	1260	114.5	1260	90.873
	114.5-123.5	FG	2180	9	920	9.78261
	123.5-189	FL	3150	65.5	1890	34.6561
M178-29
	0-230	S1 start	7700	230	7700	29.8701
	230-460	S1 end	10000	230	2300	100
M178-35
	0-336	S1 start	7700	336	7700	43.6364
	336-573	S1 end	10000	237	2300	103.043
	573-579	M1	12240	6	2240	2.67857

## Sheet: Supplementary Table H
Supplementary Table H: full list of the specific calibration standard used for each element during EMPA analysis
Method	Instrument	Voltage KeV	Current nA	Duameter um	Raster	Automation Software	Matrix Correction
WDS	JEOL JXA-8200	15	6	5	none	JEOL	PRZ (Oxide) Armstrong method
	Si	Ti	Al	Fe	Mn	Mg	Ca	Na	K	P
Calibration standards	Rhyolite (VG568)	VGA99	Rhyolite (VG568)	VGA99	Rhodonite	VGA99	VGA99	Scapolite	Rhyolite (VG568)	VGA99
Peak /Bkg -/ Bkg + seconds	20/10/10	30/-/15	20/10/10	30/15/15	40/20/20	20/10/-	20/10/10	5/-/10	30/15/15	20/10/10
Spectrometer/sequence/analysing crystal	4/1/TAP	5/1/PETH	4/2/TAP	3/1/LIF	3/2/LIF	1/2/TAPH	2/2/PETH	1/1/TAPH	2/1/PETH	5/2/PETH
