# Supplementary figures and images for: Holocene onshore/offshore tephra correlation of Mt. Etna, Sicily
Source: Springer Nature journal article supplement (doi:10.1007/s00445-024-01785-x), 2024-12-06

Appendix E: Pictures of the individual segments of core M178-35 together with a schematic drawing

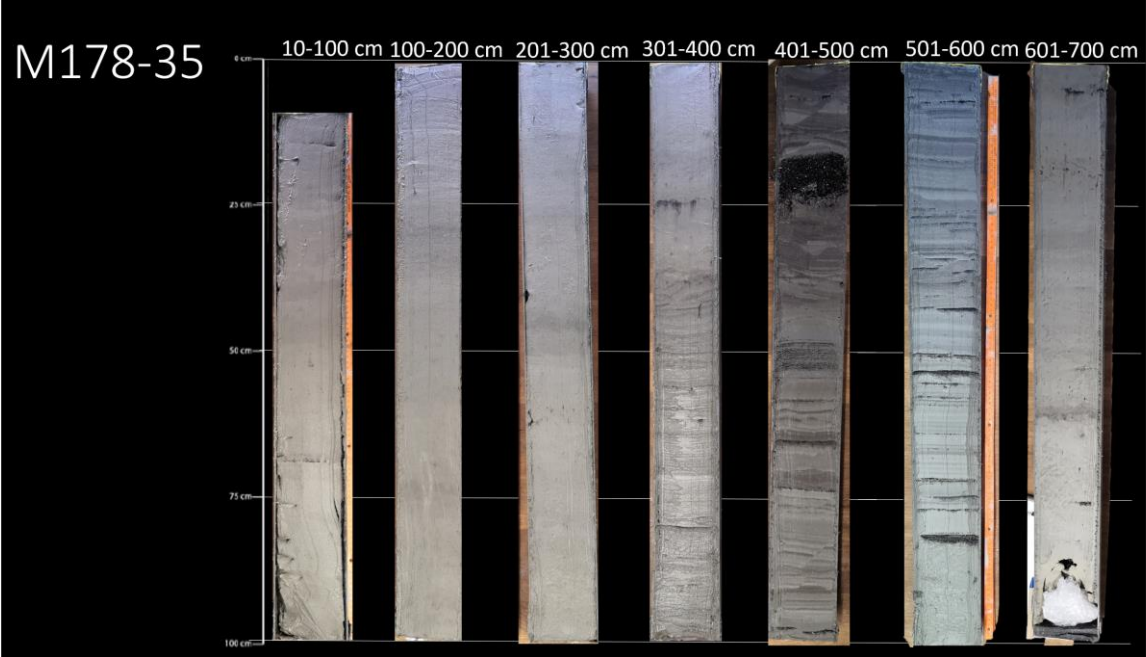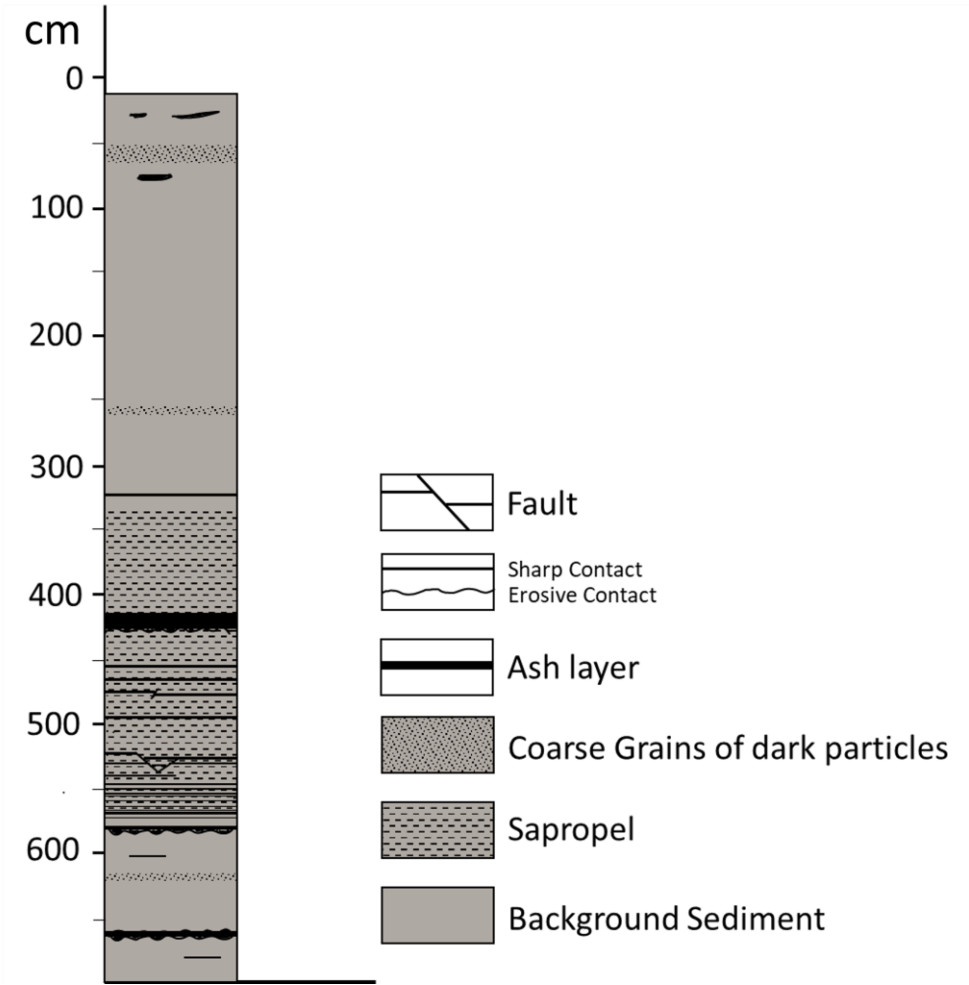

Supplement: MOESM2 [file 445_2024_1785_MOESM2_ESM.pdf]
